# Supplementary material for: Copper-promotedortho-directed C–H amination of 2-arylpyridines with NH-heterocycles
Source: Royal Society of Chemistry journal article supplement (doi:10.1039/d4ob01126k), 2024-01-01

# Copper-Promoted *ortho*-Directed C-H Amination of 2-Arylpyridines with NH-heterocycles

Yang-Hao Zeng, Lin Dong\*

## Supporting Information

### Table of Contents

|                                                            |    |
|------------------------------------------------------------|----|
| 1. General Methods.....                                    | 2  |
| 2. General Procedure for the Synthesis of Substrates ..... | 2  |
| 3. Optimization of the Reaction Conditions .....           | 3  |
| 4. General Procedure for the Synthesis of Products 3.....  | 7  |
| 5. Synthetic Applications of Products 3 .....              | 7  |
| 6. Mechanistic Studies .....                               | 9  |
| 7. References .....                                        | 12 |
| 8. Characterization Data .....                             | 13 |
| 9. NMR Spectra.....                                        | 25 |

## 1. General Methods

All solvents were dried before use following the standard procedures. Unless otherwise indicated, all starting materials purchased from commercial suppliers were used without further purification. NMR data were obtained for  $^1\text{H}$  at 400 MHz and for  $^{13}\text{C}$  at 151 or 101 MHz. Spectrometer and all chemical shift values refer to  $\text{CDCl}_3$  ( $\delta$  ( $^1\text{H}$ ), 7.26 ppm;  $\delta$  ( $^{13}\text{C}$ ), 77.10 ppm). ESI HRMS was recorded on a Waters SYNAPT G2 and Water XEVO G2 Q-ToF. TLC was performed on glass-backed silica plates. UV detection was monitored at 254 nm. Column chromatography was performed on silica gel (300-400 mesh), eluting with ethyl acetate, petroleum ether, methanol and dichloromethane. 2-phenylpyridine derivatives and azole compounds were obtained according to the literature procedures or directly purchased.

## 2. General Procedure for the Synthesis of Substrates

### 2.1 General procedure for the synthesis of 2-phenylpyridine derivatives<sup>[1]</sup>:

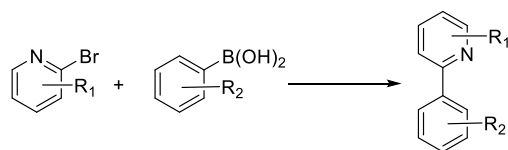

To a stirred solution of 2-bromopyridine derivatives (2.0 mmol, 1 equiv.) in toluene (7 mL), ethanol (1.5 mL), and water (7 mL) was added  $\text{Na}_2\text{CO}_3$  (1.6 g, 15 mmol, 7.5 equiv.),  $\text{Pd}(\text{PPh}_3)_4$  (0.069 g, 0.060 mmol, 3 mol%) and appropriate arylboronic acid (2.6 mmol, 1.3 equiv.) under argon in a 50 mL two-necked flask. The resulting mixture was refluxed for 4 hours. Then the reaction mixture was cooled to room temperature and aqueous  $\text{NH}_4\text{Cl}$  (15 mL) was added. Extract the mixture by ethyl acetate (20 mL) for three times. The organic solution was dried over anhydrous  $\text{Na}_2\text{SO}_4$  and evaporated to dryness. The crude product was purified by column chromatography on silica gel with petroleum ether/ethyl acetate (10:1) to obtain the product.

### 3. Optimization of the Reaction conditions

Table S1. Screening of the Catalyst <sup>a</sup>

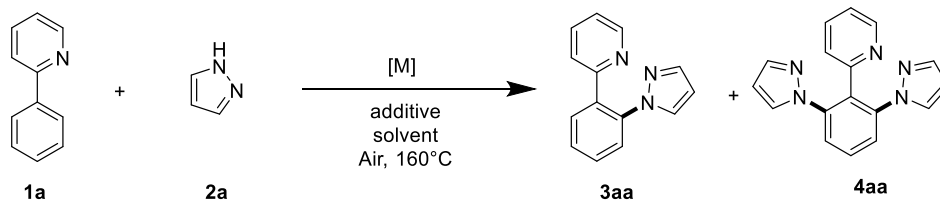

| Entry | [Cu]                                                 | Yield <sup>b</sup> (%) |     |
|-------|------------------------------------------------------|------------------------|-----|
|       |                                                      | 3aa                    | 4aa |
| 1     | CuOAc                                                | ND                     | -   |
| 2     | CuCl                                                 | ND                     | -   |
| 3     | CuBr                                                 | ND                     | -   |
| 4     | CuBr <sub>2</sub>                                    | ND                     | -   |
| 5     | Cu(TFA) <sub>2</sub> · H <sub>2</sub> O              | 41                     | -   |
| 6     | CuBr <sub>2</sub>                                    | ND                     | -   |
| 7     | Cu <sub>2</sub> (OH) <sub>2</sub> CO <sub>3</sub>    | 38                     | -   |
| 8     | CuSO <sub>4</sub>                                    | ND                     | -   |
| 9     | Cu(NO <sub>3</sub> ) <sub>2</sub> ·3H <sub>2</sub> O | ND                     | -   |
| 10    | Cu(OAc) <sub>2</sub>                                 | 50                     | <10 |

<sup>a</sup> Reaction conditions unless otherwise specified: **1a** (0.1 mmol), **2a** (0.3 mmol), [Cu] (1.5 equiv.), Na<sub>2</sub>CO<sub>3</sub> (2 equiv.), Na<sub>2</sub>S<sub>2</sub>O<sub>8</sub> (1.5 equiv.), MesCOOH (1.5 equiv.) in toluene (1 mL) at 160 °C under air for 12 h. <sup>b</sup> isolated yields.

**Table S2. Screening of the Base, Acid and Oxidant <sup>a</sup>**

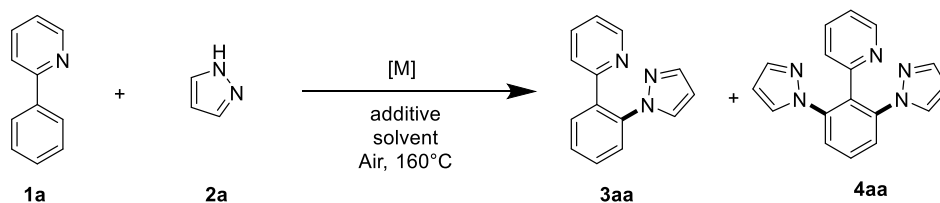

| Entry | Additive                                        |          |                                               | Yield <sup>b</sup> (%) |            |
|-------|-------------------------------------------------|----------|-----------------------------------------------|------------------------|------------|
|       | base                                            | acid     | oxidant                                       | <b>3aa</b>             | <b>4aa</b> |
| 1     | Na <sub>2</sub> CO <sub>3</sub>                 | MesCOOH  | Na <sub>2</sub> S <sub>2</sub> O <sub>8</sub> | 50                     | <10        |
| 2     | K <sub>2</sub> CO <sub>3</sub>                  | MesCOOH  | Na <sub>2</sub> S <sub>2</sub> O <sub>8</sub> | 42                     | <10        |
| 3     | Cs <sub>2</sub> CO <sub>3</sub>                 | MesCOOH  | Na <sub>2</sub> S <sub>2</sub> O <sub>8</sub> | 38                     | -          |
| 4     | (NH <sub>4</sub> ) <sub>2</sub> CO <sub>3</sub> | MesCOOH  | Na <sub>2</sub> S <sub>2</sub> O <sub>8</sub> | 30                     | -          |
| 5     | Ag <sub>2</sub> CO <sub>3</sub>                 | MesCOOH  | Na <sub>2</sub> S <sub>2</sub> O <sub>8</sub> | 27                     | -          |
| 6     | Li <sub>2</sub> CO <sub>3</sub>                 | MesCOOH  | Na <sub>2</sub> S <sub>2</sub> O <sub>8</sub> | 31                     | -          |
| 7     | NaOH                                            | MesCOOH  | Na <sub>2</sub> S <sub>2</sub> O <sub>8</sub> | 24                     | -          |
| 8     | KOH                                             | MesCOOH  | Na <sub>2</sub> S <sub>2</sub> O <sub>8</sub> | 28                     | -          |
| 9     | KOAc                                            | MesCOOH  | Na <sub>2</sub> S <sub>2</sub> O <sub>8</sub> | 32                     | -          |
| 10    | K <sub>3</sub> PO <sub>4</sub>                  | MesCOOH  | Na <sub>2</sub> S <sub>2</sub> O <sub>8</sub> | 45                     | -          |
| 11    | Na <sub>2</sub> CO <sub>3</sub>                 | PhCOOH   | Na <sub>2</sub> S <sub>2</sub> O <sub>8</sub> | 44                     | -          |
| 12    | Na <sub>2</sub> CO <sub>3</sub>                 | HOAc     | Na <sub>2</sub> S <sub>2</sub> O <sub>8</sub> | 40                     | -          |
| 13    | Na <sub>2</sub> CO <sub>3</sub>                 | 1-AdCOOH | Na <sub>2</sub> S <sub>2</sub> O <sub>8</sub> | 32                     | -          |
| 14    | Na <sub>2</sub> CO <sub>3</sub>                 | TsOH     | Na <sub>2</sub> S <sub>2</sub> O <sub>8</sub> | 25                     | -          |
| 15    | Na <sub>2</sub> CO <sub>3</sub>                 | PivOH    | Na <sub>2</sub> S <sub>2</sub> O <sub>8</sub> | 33                     | -          |
| 16    | Na <sub>2</sub> CO <sub>3</sub>                 | PFBA     | Na <sub>2</sub> S <sub>2</sub> O <sub>8</sub> | 44                     | -          |
| 17    | Na <sub>2</sub> CO <sub>3</sub>                 | MesCOOH  | K <sub>2</sub> S <sub>2</sub> O <sub>8</sub>  | 48                     | -          |
| 18    | Na <sub>2</sub> CO <sub>3</sub>                 | MesCOOH  | AgF                                           | 58                     | <10        |
| 19    | Na <sub>2</sub> CO <sub>3</sub>                 | MesCOOH  | Ag <sub>2</sub> O                             | 38                     | -          |
| 20    | Na <sub>2</sub> CO <sub>3</sub>                 | MesCOOH  | AgOAc                                         | 35                     | -          |
| 21    | Na <sub>2</sub> CO <sub>3</sub>                 | MesCOOH  | AgTFA                                         | 44                     | -          |
| 22    | Na <sub>2</sub> CO <sub>3</sub>                 | MesCOOH  | AgOTf                                         | 46                     | -          |

|    |                                 |         |                   |    |   |
|----|---------------------------------|---------|-------------------|----|---|
| 23 | Na <sub>2</sub> CO <sub>3</sub> | MesCOOH | AgNO <sub>3</sub> | 34 | - |
| 24 | Na <sub>2</sub> CO <sub>3</sub> | MesCOOH | selecflour        | 33 | - |
| 25 | Na <sub>2</sub> CO <sub>3</sub> | MesCOOH | NMO               | 36 | - |
| 26 | Na <sub>2</sub> CO <sub>3</sub> | MesCOOH | DDQ               | 38 | - |

---

<sup>a</sup> Reaction conditions unless otherwise specified: **1a** (0.1 mmol), **2a** (0.3 mmol), Cu(OAc)<sub>2</sub> (1.5 equiv), base (2 equiv.), oxidant (1.5 equiv.), acid (1.5 equiv.) in toluene (1 mL) at 160 °C under air for 12 h. <sup>b</sup> isolated yields.

Table S3. Screening of the Solvent <sup>a</sup>

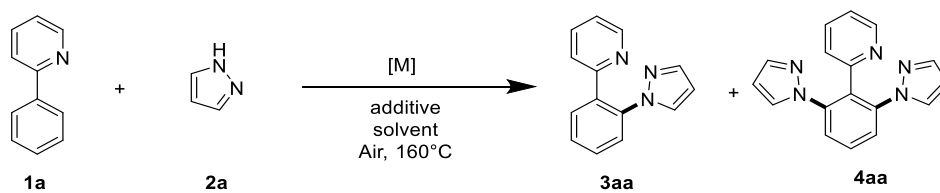

| Entry           | Solvent                     | Yield <sup>b</sup> (%) |            |
|-----------------|-----------------------------|------------------------|------------|
|                 |                             | <b>3aa</b>             | <b>4aa</b> |
| 1               | DMF                         | ND                     | -          |
| 2               | DMSO                        | ND                     | -          |
| 3               | MeCN                        | ND                     | -          |
| 4               | DCE                         | 12                     | -          |
| 5               | MeOH                        | ND                     | -          |
| 6               | Tol                         | 58                     | <10        |
| 7               | TFE                         | 53                     | <10        |
| 8               | HFIP                        | 62                     | 15         |
| 9               | <i>o</i> -Xylene            | 47                     | <10        |
| 10              | <i>m</i> -Xylene            | 61                     | <10        |
| 11 <sup>c</sup> | <i>m</i> -Xylene            | 65                     | <10        |
| 12 <sup>d</sup> | <i>m</i> -Xylene            | 60                     | <10        |
| 13 <sup>c</sup> | <i>m</i> -Xylene : HFIP=1:2 | 73                     | 11         |
| 14 <sup>c</sup> | <i>m</i> -Xylene : HFIP=1:1 | 70                     | -          |
| 15 <sup>c</sup> | <i>m</i> -Xylene : HFIP=2:1 | 67                     | -          |
| 16 <sup>c</sup> | <i>m</i> -Xylene : HFIP=1:3 | 70                     | -          |
| 17 <sup>c</sup> | <i>m</i> -Xylene : HFIP=3:1 | 65                     | -          |

<sup>a</sup> Reaction conditions unless otherwise specified: **1a** (0.1 mmol), **2a** (0.3 mmol), Cu(OAc)<sub>2</sub> (1.5 equiv), Na<sub>2</sub>CO<sub>3</sub> (2 equiv.), MesCOOH (1.5 equiv.), AgF (1.5 equiv.), in solvent (1 mL) at 160 °C under air for 12 h. <sup>b</sup> isolated yields. <sup>c</sup> Solvent = 1.5 mL in total. <sup>d</sup> Solvent = 2 mL in total.

## 4. General Procedure for the Synthesis of products 3

### 4.1 General procedure for the synthesis of products 3:

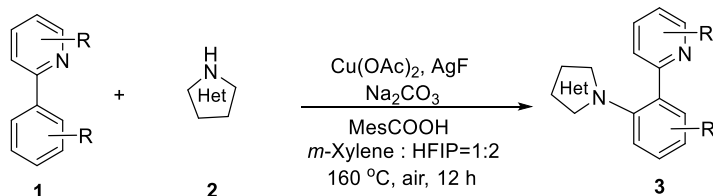

A mixture of **2-phenylpyridine derivatives 1** (0.1 mmol), **azole compounds 2** (1 mmol),  $\text{Cu}(\text{OAc})_2$  (27.2 mg, 1.5 equiv.), AgF (25.4 mg, 2 equiv.),  $\text{Na}_2\text{CO}_3$  (21.2 mg, 2 equiv.) and MesCOOH (24.6 mg, 1.5 equiv.), in the solvent  $m$ -Xylene : HFIP=1:2 (total 1.5 mL) was vigorously stirred at 160 °C for 12 h under air. After cooling to ambient temperature, all volatiles were evaporated under reduced pressure. The resulting residue was purified by column chromatography on silica gel (eluent: petroleum ether/ethyl acetate = 2.5:1, v/v) to give products 3.

### 4.2 Unsuccessful substrates:

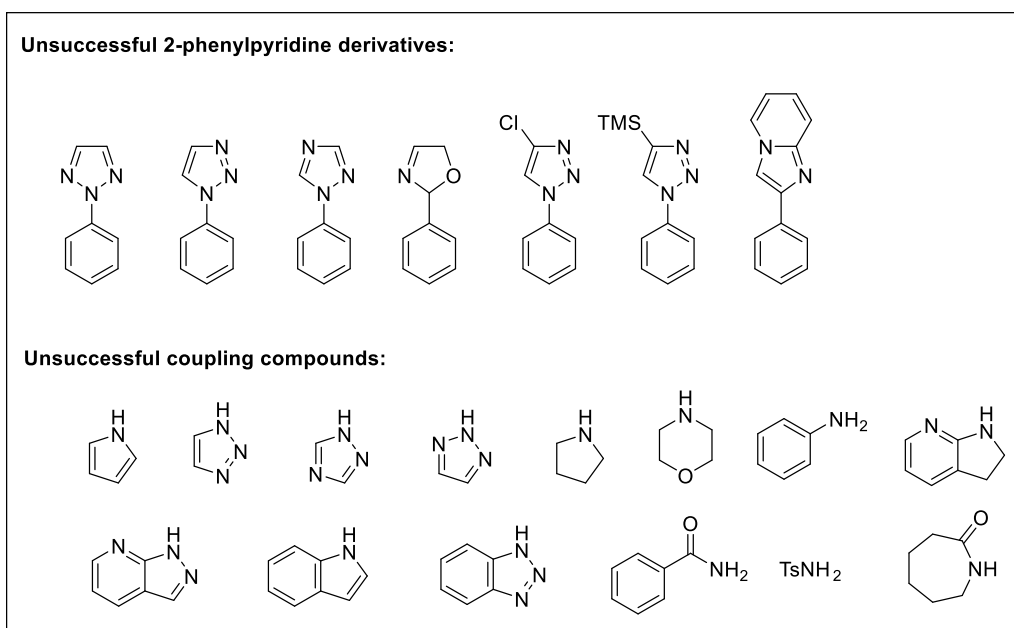

## 5. Synthetic Applications of Products 3

### 5.1 Procedure for the synthesis of compound 7<sup>[2]</sup>:

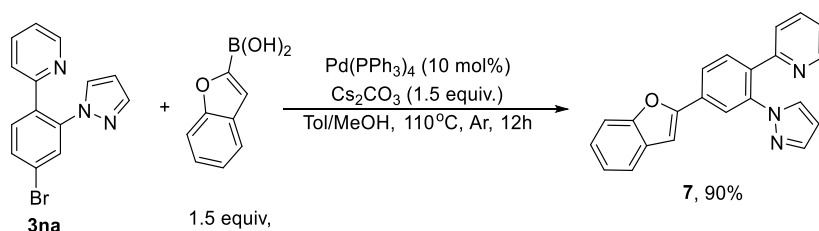

Charge a round bottom flask with **3na** (0.1 mmol, 1.0 equiv.), benzofuran-2-ylboronic acid (1.5 equiv.), palladium catalyst (10 mol%), Cs<sub>2</sub>CO<sub>3</sub> (1.5 equiv.) and add toluene (1.6 mL) and methanol (0.4 mL) subsequently. Then heat the reaction mixture in an oil bath at 110 °C under Ar. Monitor the reaction by TLC analysis for 12 hours till complete conversion of the starting materials. Cool the reaction mixture to 23 °C. Quench the reaction with saturated NH<sub>4</sub>Cl solution and extract the aqueous phase with ethyl acetate (10 mL x 3). Wash the combined organic phases with brine (10 mL). Dry the combined organic phases over MgSO<sub>4</sub> and filter. Concentrating the mixture under reduced pressure. The reaction mixture was purified by flash chromatography eluting with ethyl acetate and PE (1:2.5) to give the product **7** as a white solid (30.3 mg, 90% yield).

### 5.2 Procedure for the synthesis of compound **8**<sup>[3]</sup>:

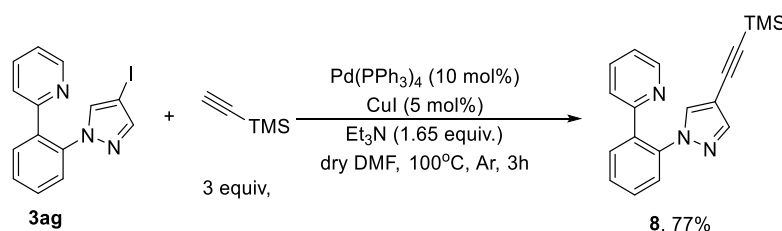

To a solution of **3ag** (0.15 mmol) in dry DMF (0.5 mL) was added Pd(PPh<sub>3</sub>)<sub>4</sub> (10 mol%), CuI (5 mol%), triethylamine (1.65 equiv.) and trimethylsilylacetylene (0.45 mmol) under Ar. Stirring the reaction mixture for 3 h in an oil bath at 110 °C. After completion, the reaction mixture was concentrated and purified by flash chromatography eluting with ethyl acetate and PE (1:2.5) to give the product **8** as a yellow solid (36.6 mg, 77% yield).

### 5.3 Procedure for the synthesis of compound **9**<sup>[4]</sup>:

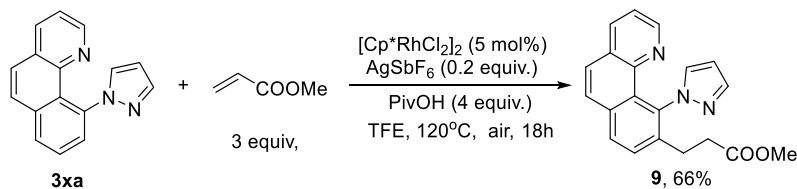

To a flame-dried screw-cap tube equipped with a magnetic stir bar were introduced **3xa** (24.5mg, 0.1 mmol), methyl acrylate (3.0 equiv.), [Cp\*RhCl<sub>2</sub>]<sub>2</sub> (5 mol %), PivOH (4.0 equiv), AgSbF<sub>6</sub> (0.2 equiv.), and TFE (1.0 mL). The reaction mixture was stirred in preheated oil bath at 120 °C under an air atmosphere for 18 h. After completion, the reaction mixture was purified by flash chromatography eluting with ethyl acetate and PE (1:2.5) to give the product **9** as a yellow solid (21.8 mg, 66% yield).



## 6. Mechanistic Studies

### 6.1 Deuterium incorporation experiment:

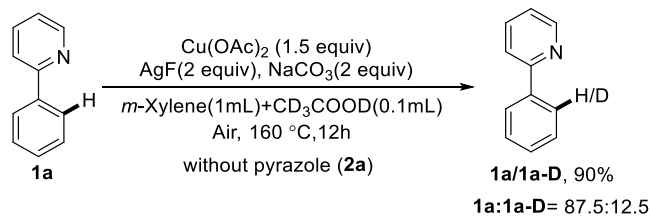

To a mixture of **1a** (15.5 mg, 0.1 mmol), Cu(OAc)<sub>2</sub> (1.5 equiv.), AgF (2 equiv.) and Na<sub>2</sub>CO<sub>3</sub> (2 equiv.) *m*-Xylene (1 mL) was added CD<sub>3</sub>COOD (0.1 mL) and the reaction mixture was stirred at 160 °C for 12 h under air. All volatiles were then removed under reduced pressure and the resulting residue was purified by column chromatography on silica gel (eluent: EtOAc/PE = 1:10, v/v) to afford compound **1a-D/1a** (13.9 mg, 90%), which was characterized by <sup>1</sup>H NMR spectroscopy. <sup>1</sup>H NMR analysis of **1a** 12.5% deuterium incorporation at the 2-position of the phenyl ring.

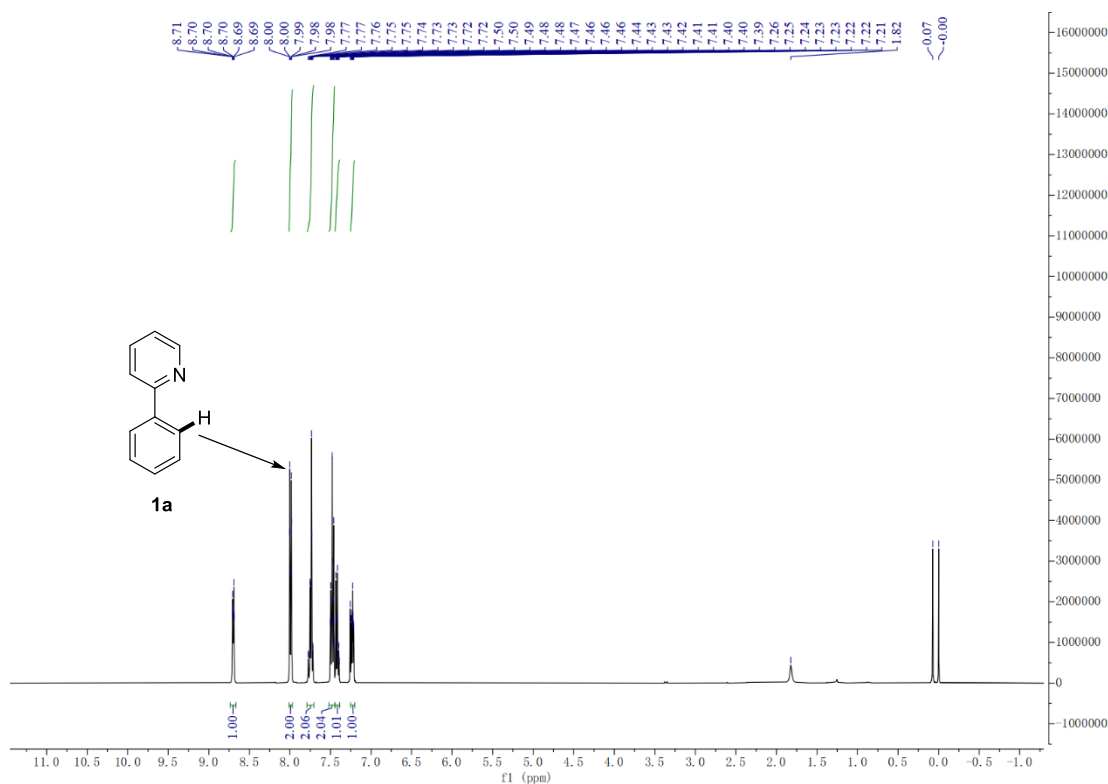

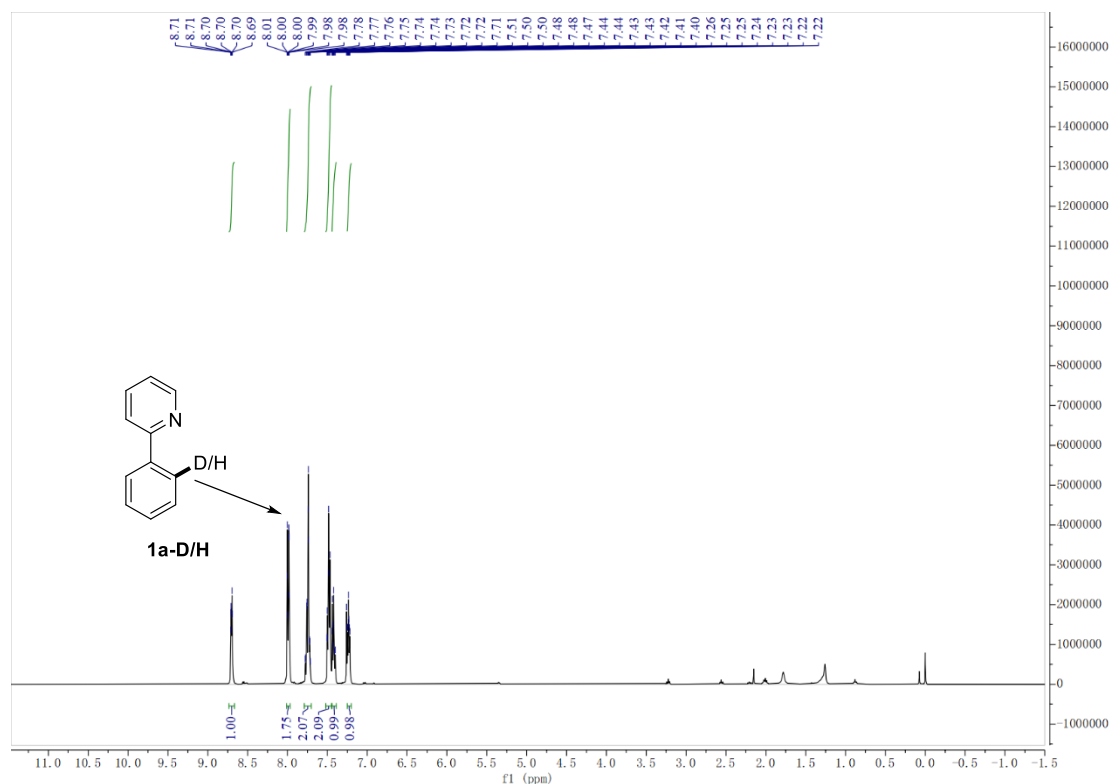

## 6.2 Radical experiments:

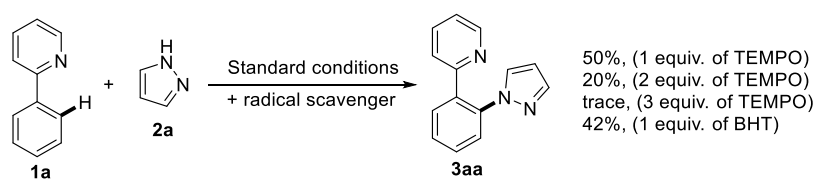

A mixture of **1a** (15.5 mg, 0.1 mmol), pyrazole **2a** (0.5 mmol), Cu(OAc)<sub>2</sub> (1.5 equiv.), AgF (2 equiv.), Na<sub>2</sub>CO<sub>3</sub> (2 equiv.), MesCOOH (1.5 equiv.) and BHT (1 equiv.) or Tempo (1 equiv.) in solvent of *m*-Xylene : HFIP = 1:2 (total 1.5 mL) was stirred at 160 °C for 12 h under air. All volatiles were then removed under reduced pressure and the resulting residue was purified by column chromatography on silica gel (eluent: EtOAc/PE = 1:10, v/v) to afford compound **3aa** with an obviously lower yield.

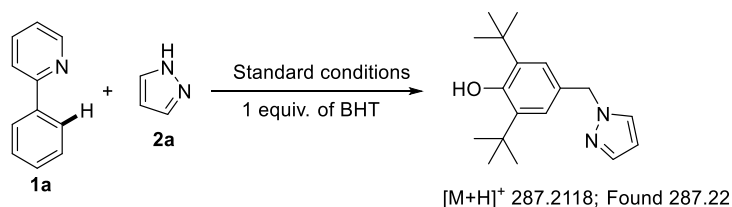

A mixture of **1a** (15.5 mg, 0.1 mmol), pyrazole **2a** (0.5 mmol), Cu(OAc)<sub>2</sub> (1.5 equiv.), AgF (2 equiv.), Na<sub>2</sub>CO<sub>3</sub> (2 equiv.), MesCOOH (1.5 equiv.) and BHT (1 equiv.) in solvent of *m*-Xylene : HFIP = 1:2 (total 1.5 mL) was stirred at 160 °C for 4 h under air. Subsequently, the reaction mixture was analyzed by LC-MS, where radical intermediate's molecular mass was found 287.22.

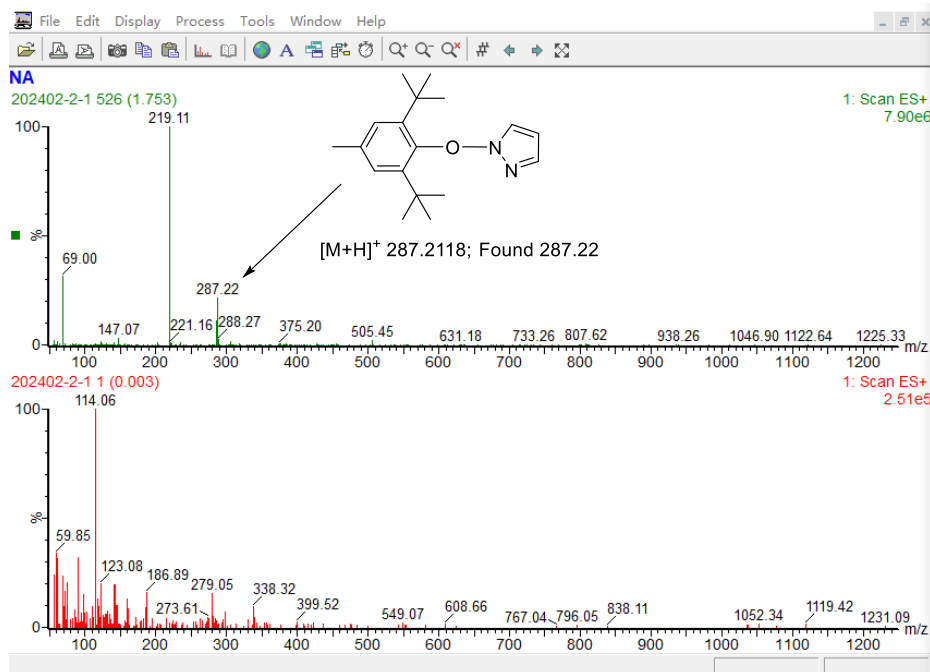

### 6.3 KIE experiment:

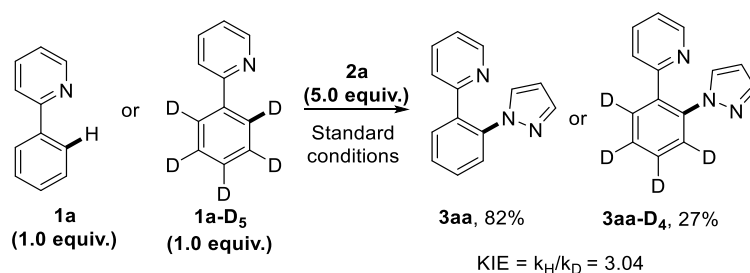

At the same time, a mixture of **1a** (15.5 mg, 0.1 mmol) or **1a-D<sub>5</sub>**, pyrazole **2a** (0.5 mmol), Cu(OAc)<sub>2</sub> (1.5 equiv.), AgF (2 equiv.), Na<sub>2</sub>CO<sub>3</sub> (2 equiv.), MesCOOH (1.5 equiv.) in solvent of *m*-Xylene : HFIP = 1:2 (total 1.5 mL) was stirred at 160 °C for 12 h under air. Then, all volatiles were then removed under reduced pressure and the resulting residue was purified by column chromatography on silica gel (eluent: EtOAc/PE = 1:2.5, v/v) to afford compound **3aa** in 82% yield or **3aa-D<sub>4</sub>** in 27% yield. Thus, the KIE value was 3.04, which meant the first *ortho* C–H bond cleavage might be the rate-determining step.

### 6.4 Competition experiment:

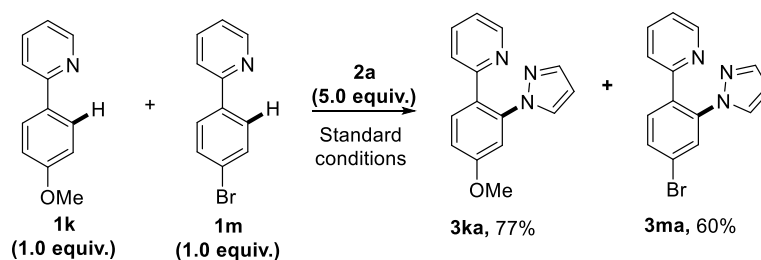

A mixture of **1k** (0.1 mmol), **1m** (0.1 mmol), pyrazole **2a** (0.5 mmol), Cu(OAc)<sub>2</sub> (1.5 equiv.), AgF (2 equiv.), Na<sub>2</sub>CO<sub>3</sub> (2 equiv.), MesCOOH (1.5 equiv.) in solvent of *m*-Xylene : HFIP = 1:2 (total 1.5 mL) was stirred at 160 °C for 12 h under air. All volatiles were then removed under reduced pressure and the resulting residue was purified by column chromatography on silica gel (eluent: EtOAc/PE = 1:2.5, v/v) to afford compound **3ka** in 77% yield or **3ma** in 60% yield, which revealed that electronically rich substrates reacted preferentially.

## 7. References

- [1] Chu, W.-D.; Liang, T.-T.; Ni, H. et al. Palladium-Catalyzed Intermolecular Asymmetric Dearomative Annulation of Phenols with Vinyl Cyclopropanes. *Org. Lett.* **2022**, 24, 27, 4865–4870.
- [2] Wu, S.-S.; Li, Y.-G.; Xie, S.-Y. et al. Supramolecular Nanotubules as a Catalytic Regulator for Palladium Cations: Applications in Selective Catalysis. *Angew. Chem. Int. Ed.* **2017**, 56, 11511–11514.
- [3] Brach, N.; Popek, L.; Truong, M. et al. Divergent Synthesis of 6- or 7-Aza-Indazoles via Intramolecular Diels–Alder Cascade of Pyrazines. *Org. Lett.* **2023**, 25, 7847–7851.
- [4] Liu, H.; Gong, R.-Z.; Zhao, Y.; Zheng, J.; Xu, Y.-J.; Dong, L. Cascade Alkenylation/Intramolecular Friedel–Crafts Alkylation: High Selectivity at the C7-Position of BINOL. *J. Org. Chem.* **2023**, 88, 6108–6119.

## 8. Characterization Data

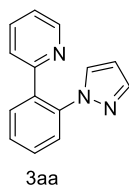

**2-(2-(1H-pyrazol-1-yl)phenyl)pyridine (3aa):** Prepared as shown in general procedure; yellow oil; eluent (petroleum ether/EtOAc = 2.5:1, v/v); yield is 90% (19.9 mg). <sup>1</sup>H NMR (400 MHz, CDCl<sub>3</sub>) δ 8.57 (ddd, *J* = 4.9, 1.9, 1.0 Hz, 1H), 7.74 – 7.67 (m, 1H), 7.56 (d, *J* = 1.9 Hz, 1H), 7.51 (dd, *J* = 5.9, 3.4 Hz, 1H), 7.43 (dd, *J* = 5.9, 3.5 Hz, 2H), 7.39 (td, *J* = 7.7, 1.8 Hz, 1H), 7.13 (d, *J* = 2.4 Hz, 1H), 7.07 (ddd, *J* = 7.6, 4.9, 1.2 Hz, 1H), 6.69 (dt, *J* = 8.0, 1.1 Hz, 1H), 6.16 (t, *J* = 2.2 Hz, 1H). <sup>13</sup>C NMR (151 MHz, CDCl<sub>3</sub>) δ 156.3, 149.7, 140.5, 138.6, 136.0, 135.8, 131.3, 131.0, 129.4, 128.5, 126.5, 123.5, 122.2, 106.7. HRMS (ESI) (*m/z*) Calculated for C<sub>14</sub>H<sub>12</sub>N<sub>3</sub><sup>+</sup> [*M* + *H*]<sup>+</sup>: 222.1026; found: 222.1029.

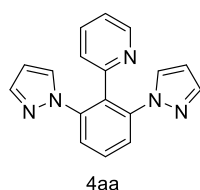

**2-(2,6-di(1H-pyrazol-1-yl)phenyl)pyridine (4aa):** Prepared as shown in general procedure; pale yellow oil; eluent (petroleum ether/EtOAc = 1:1, v/v). <sup>1</sup>H NMR (400 MHz, CDCl<sub>3</sub>) δ 8.47 (dt, *J* = 4.9, 1.3 Hz, 1H), 7.69 (d, *J* = 6.6 Hz, 2H), 7.67 – 7.61 (m, 1H), 7.52 (d, *J* = 1.8 Hz, 2H), 7.49 (td, *J* = 7.8, 1.8 Hz, 1H), 7.21 (d, *J* = 2.5 Hz, 2H), 7.12 (ddd, *J* = 7.7, 4.9, 1.2 Hz, 1H), 6.99 (d, *J* = 7.9 Hz, 1H), 6.14 (t, *J* = 2.2 Hz, 2H). <sup>13</sup>C NMR (101 MHz, CDCl<sub>3</sub>) δ 153.9, 149.2, 140.5, 140.3, 136.4, 131.7, 131.4, 129.7, 126.1, 125.1, 122.5, 106.5. HRMS (ESI) (*m/z*) Calculated for C<sub>17</sub>H<sub>14</sub>N<sub>5</sub><sup>+</sup> [*M* + *H*]<sup>+</sup>: 288.1244; found: 288.1246.

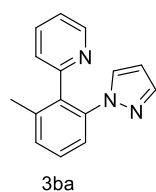

**2-(2-methyl-6-(1H-pyrazol-1-yl)phenyl)pyridine (3ba):** Prepared as shown in general procedure; pale yellow oil; eluent (petroleum ether/EtOAc = 2.5:1, v/v); yield is 63% (14.8 mg). <sup>1</sup>H NMR (400 MHz, CDCl<sub>3</sub>) δ 8.65 (ddd, *J* = 5.0, 1.9, 1.0 Hz, 1H), 7.54 (td, *J* = 7.7, 1.8 Hz, 1H), 7.49 (d, *J* = 1.9 Hz, 1H), 7.45 – 7.37 (m, 2H), 7.35 – 7.30 (m, 1H), 7.17 (ddd, *J* = 7.6, 4.9, 1.2 Hz, 1H), 7.06 (d, *J* = 2.4 Hz, 1H), 6.96 (dt, *J* = 7.8, 1.1 Hz, 1H), 6.06 (t, *J* = 2.1 Hz, 1H), 2.18 (s, 3H). <sup>13</sup>C NMR (151 MHz, CDCl<sub>3</sub>) δ 156.9, 149.3, 140.0, 139.4, 137.9, 136.4, 135.6, 131.3, 130.1, 128.9, 124.6, 123.6, 122.1, 106.0, 20.3. HRMS (ESI) (*m/z*) Calculated for C<sub>15</sub>H<sub>14</sub>N<sub>3</sub><sup>+</sup> [*M* + *H*]<sup>+</sup>: 236.1182; found: 236.1187.

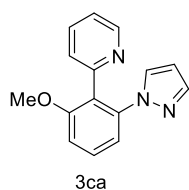

**2-(2-methoxy-6-(1H-pyrazol-1-yl)phenyl)pyridine (3ca):** Prepared as shown in general procedure; pale yellow oil; eluent (petroleum ether/EtOAc = 2.5:1, v/v); yield is 73% (18.3 mg). <sup>1</sup>H NMR (400 MHz, CDCl<sub>3</sub>) δ 8.61 (ddd, *J* = 4.9, 1.9, 1.0 Hz, 1H), 7.56 (td, *J* = 7.7, 1.8 Hz, 1H), 7.50 – 7.43 (m, 2H), 7.24 (dd, *J* = 8.1, 1.0 Hz, 1H), 7.16 (ddd, *J* = 7.6, 4.9, 1.2 Hz, 1H), 7.11 – 7.06 (m, 2H), 7.01 (dd, *J* = 8.4, 1.1 Hz, 1H), 6.07 (dd, *J* = 2.4, 1.8 Hz, 1H), 3.78 (s, 3H). <sup>13</sup>C NMR (151 MHz, CDCl<sub>3</sub>) δ 157.7, 154.3, 149.2, 140.3, 140.1, 136.2, 131.3, 129.9, 125.4, 125.3, 122.1, 118.1, 110.6, 106.1, 56.2. HRMS (ESI) (*m/z*) Calculated for C<sub>15</sub>H<sub>14</sub>N<sub>3</sub>O<sup>+</sup> [*M* + *H*]<sup>+</sup>: 252.1132; found: 252.1138.

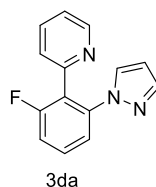

**2-(2-fluoro-6-(1H-pyrazol-1-yl)phenyl)pyridine (3da):** Prepared as shown in general procedure; pale yellow oil; eluent (petroleum ether/EtOAc = 2.5:1, v/v); yield is 95% (22.7 mg). <sup>1</sup>H NMR (400 MHz, CDCl<sub>3</sub>) δ 8.62 (ddd, *J* = 4.9, 1.8, 0.9 Hz, 1H), 7.62 (td, *J* = 7.7, 1.8 Hz, 1H), 7.52 (d, *J* = 2.0 Hz, 1H), 7.50 – 7.42 (m,

2H), 7.24 – 7.18 (m, 2H), 7.17 – 7.11 (m, 2H), 6.15 (t,  $J = 2.1$  Hz, 1H).  $^{13}\text{C}$  NMR (101 MHz,  $\text{CDCl}_3$ )  $\delta$  160.3 (d,  $J_{\text{C-F}} = 247$  Hz), 151.7, 149.6, 140.7, 140.4 (d,  $J_{\text{C-F}} = 5$  Hz), 136.5, 131.1, 130.2 (d,  $J_{\text{C-F}} = 9$  Hz), 125.3, 124.3 (d,  $J_{\text{C-F}} = 18$  Hz), 122.8, 121.5 (d,  $J_{\text{C-F}} = 3$  Hz), 115.4 (d,  $J_{\text{C-F}} = 22$  Hz), 106.7. HRMS (ESI) (m/z) Calculated for  $\text{C}_{14}\text{H}_{11}\text{N}_3\text{F}^+$  [ $\text{M} + \text{H}$ ] $^+$ : 240.0932; found: 240.0933.

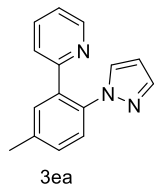

**2-(5-methyl-2-(1H-pyrazol-1-yl)phenyl)pyridine (3ea):** Prepared as shown in general procedure; pale yellow oil; eluent (petroleum ether/EtOAc = 2.5:1, v/v); yield is 91% (21.3 mg).  $^1\text{H}$  NMR (400 MHz,  $\text{CDCl}_3$ )  $\delta$  8.63 (ddd,  $J = 4.9, 1.9, 1.0$  Hz, 1H), 7.59 (dd,  $J = 12.8, 2.0$  Hz, 2H), 7.48 – 7.38 (m, 2H), 7.30 (dd,  $J = 8.1, 2.1$  Hz, 1H), 7.18 – 7.10 (m, 2H), 6.71 (dt,  $J = 8.0, 1.1$  Hz, 1H), 6.20 (t,  $J = 2.1$  Hz, 1H), 2.44 (s, 3H).  $^{13}\text{C}$  NMR (151 MHz,  $\text{CDCl}_3$ )  $\delta$  156.4, 149.6, 140.4, 138.7, 136.3, 136.0, 135.6, 131.4, 131.4, 130.1, 126.5, 123.5, 122.1, 106.5, 21.1. HRMS (ESI) (m/z) Calculated for  $\text{C}_{15}\text{H}_{14}\text{N}_3^+$  [ $\text{M} + \text{H}$ ] $^+$ : 236.1182; found: 236.1186.

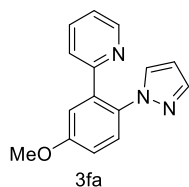

**2-(5-methoxy-2-(1H-pyrazol-1-yl)phenyl)pyridine (3fa):** Prepared as shown in general procedure; pale yellow oil; eluent (petroleum ether/EtOAc = 2.5:1, v/v); yield is 90% (22.6 mg).  $^1\text{H}$  NMR (400 MHz,  $\text{CDCl}_3$ )  $\delta$  8.62 (ddd,  $J = 4.9, 1.9, 1.0$  Hz, 1H), 7.60 (dd,  $J = 1.9, 0.6$  Hz, 1H), 7.47 – 7.41 (m, 2H), 7.29 (d,  $J = 2.9$  Hz, 1H), 7.18 – 7.11 (m, 2H), 7.02 (dd,  $J = 8.7, 3.0$  Hz, 1H), 6.70 (dt,  $J = 7.9, 1.1$  Hz, 1H), 6.19 (t,  $J = 2.1$  Hz, 1H), 3.87 (s, 3H).  $^{13}\text{C}$  NMR (151 MHz,  $\text{CDCl}_3$ )  $\delta$  159.6, 156.0, 149.6, 140.2, 137.3, 136.1, 131.9, 131.5, 128.1, 123.4, 122.3, 115.6, 114.9, 106.4, 55.7. HRMS (ESI) (m/z) Calculated for  $\text{C}_{15}\text{H}_{14}\text{N}_3\text{O}^+$  [ $\text{M} + \text{H}$ ] $^+$ : 252.1132; found: 252.1139.

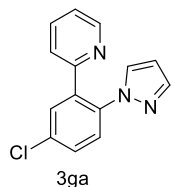

**2-(5-chloro-2-(1H-pyrazol-1-yl)phenyl)pyridine (3ga):** Prepared as shown in general procedure; yellow solid; eluent (petroleum ether/EtOAc = 2.5:1, v/v); yield is 88% (22.4 mg).  $^1\text{H}$  NMR (400 MHz,  $\text{CDCl}_3$ )  $\delta$  8.64 (d,  $J = 5.0$  Hz, 1H), 7.77 (d,  $J = 2.3$  Hz, 1H), 7.63 (d,  $J = 1.8$  Hz, 1H), 7.53 – 7.48 (m, 2H), 7.48 – 7.45 (m, 1H), 7.22 – 7.13 (m, 2H), 6.73 (d,  $J = 7.9$  Hz, 1H), 6.23 (t,  $J = 2.2$  Hz, 1H).  $^{13}\text{C}$  NMR (151 MHz,  $\text{CDCl}_3$ )  $\delta$  154.9, 149.8, 140.9, 137.1, 136.3, 134.4, 131.4, 131.0, 129.5, 127.9, 123.5, 122.7, 107.1. HRMS (ESI) (m/z) Calculated for  $\text{C}_{14}\text{H}_{11}\text{N}_3\text{Cl}^+$  [ $\text{M} + \text{H}$ ] $^+$ : 256.0636; found: 256.0637.

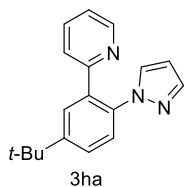

**2-(5-(tert-butyl)-2-(1H-pyrazol-1-yl)phenyl)pyridine (3ha):** Prepared as shown in general procedure; yellow oil; eluent (petroleum ether/EtOAc = 2.5:1, v/v); yield is 90% (14.9 mg).  $^1\text{H}$  NMR (400 MHz,  $\text{CDCl}_3$ )  $\delta$  8.69 – 8.63 (m, 1H), 7.75 (d,  $J = 2.2$  Hz, 1H), 7.62 (d,  $J = 1.8$  Hz, 1H), 7.57 – 7.43 (m, 3H), 7.16 (dd,  $J = 7.7, 4.0$  Hz, 2H), 6.75 (d,  $J = 7.9$  Hz, 1H), 6.21 (t,  $J = 2.1$  Hz, 1H), 1.39 (s, 9H).  $^{13}\text{C}$  NMR (151 MHz,  $\text{CDCl}_3$ )  $\delta$  156.8, 151.8, 149.7, 140.4, 136.2, 136.0, 135.3, 131.4, 127.8, 126.7, 126.2, 123.7, 122.1, 106.5, 34.9, 31.3. HRMS (ESI) (m/z) Calculated for  $\text{C}_{18}\text{H}_{20}\text{N}_3^+$  [ $\text{M} + \text{H}$ ] $^+$ : 278.1652; found: 278.1656.

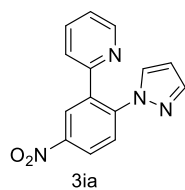

**2-(5-nitro-2-(1H-pyrazol-1-yl)phenyl)pyridine (3ia):** Prepared as shown in general procedure; yellow solid; eluent (petroleum ether/EtOAc = 2.5:1, v/v); yield is 65% (17.3 mg). <sup>1</sup>H NMR (400 MHz, CDCl<sub>3</sub>) δ 8.71 (ddd, *J* = 4.9, 1.8, 1.0 Hz, 1H), 8.62 (d, *J* = 2.6 Hz, 1H), 8.36 (dd, *J* = 8.8, 2.6 Hz, 1H), 7.83 (d, *J* = 8.8 Hz, 1H), 7.69 (d, *J* = 1.8 Hz, 1H), 7.59 (td, *J* = 7.8, 1.8 Hz, 1H), 7.28 (ddd, *J* = 7.6, 4.9, 1.1 Hz, 1H), 7.18 (d, *J* = 2.5 Hz, 1H), 6.88 (dt, *J* = 7.9, 1.1 Hz, 1H), 6.31 – 6.23 (m, 1H). <sup>13</sup>C NMR (101 MHz, CDCl<sub>3</sub>) δ 154.5, 150.3, 146.8, 143.1, 142.0, 136.7, 135.9, 131.3, 127.0, 126.9, 124.4, 123.7, 123.3, 108.0. HRMS (ESI) (*m/z*) Calculated for C<sub>14</sub>H<sub>11</sub>N<sub>4</sub>O<sub>2</sub><sup>+</sup> [*M* + *H*]<sup>+</sup>: 267.0877; found: 267.0876.

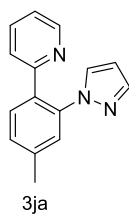

**2-(4-methyl-2-(1H-pyrazol-1-yl)phenyl)pyridine (3ja):** Prepared as shown in general procedure; yellow oil; eluent (petroleum ether/EtOAc = 2.5:1, v/v); yield is 88% (20.7 mg). <sup>1</sup>H NMR (400 MHz, CDCl<sub>3</sub>) δ 8.67 – 8.59 (m, 1H), 7.69 – 7.59 (m, 2H), 7.44 (td, *J* = 7.7, 1.9 Hz, 1H), 7.39 (d, *J* = 1.8 Hz, 1H), 7.31 (dd, *J* = 7.9, 1.8 Hz, 1H), 7.17 – 7.10 (m, 2H), 6.69 (dt, *J* = 7.9, 1.1 Hz, 1H), 6.21 (t, *J* = 2.1 Hz, 1H), 2.43 (s, 3H). <sup>13</sup>C NMR (151 MHz, CDCl<sub>3</sub>) δ 156.3, 149.6, 140.5, 139.8, 138.4, 136.0, 132.9, 131.4, 130.9, 129.4, 127.1, 123.5, 122.0, 106.6, 21.1. HRMS (ESI) (*m/z*) Calculated for C<sub>15</sub>H<sub>14</sub>N<sub>3</sub><sup>+</sup> [*M* + *H*]<sup>+</sup>: 236.1182; found: 236.1188.

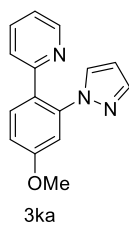

**2-(4-methoxy-2-(1H-pyrazol-1-yl)phenyl)pyridine (3ka):** Prepared as shown in general procedure; pale yellow oil; eluent (petroleum ether/EtOAc = 2.5:1, v/v); yield is 89% (22.3 mg). <sup>1</sup>H NMR (400 MHz, CDCl<sub>3</sub>) δ 8.61 (ddd, *J* = 4.9, 1.9, 1.0 Hz, 1H), 7.70 (d, *J* = 8.6 Hz, 1H), 7.64 (dd, *J* = 1.8, 0.6 Hz, 1H), 7.43 (td, *J* = 7.7, 1.8 Hz, 1H), 7.16 (dd, *J* = 2.4, 0.7 Hz, 1H), 7.14 – 7.08 (m, 2H), 7.05 (dd, *J* = 8.6, 2.6 Hz, 1H), 6.65 (dt, *J* = 8.0, 1.1 Hz, 1H), 6.22 (t, *J* = 2.1 Hz, 1H), 3.87 (s, 3H). <sup>13</sup>C NMR (151 MHz, CDCl<sub>3</sub>) δ 160.4, 156.2, 149.6, 140.6, 139.5, 136.0, 132.1, 131.5, 128.2, 123.5, 121.8, 115.2, 111.2, 106.8, 55.7. HRMS (ESI) (*m/z*) Calculated for C<sub>15</sub>H<sub>14</sub>N<sub>3</sub>O<sup>+</sup> [*M* + *H*]<sup>+</sup>: 252.1132; found: 252.1138.

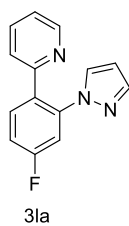

**2-(4-fluoro-2-(1H-pyrazol-1-yl)phenyl)pyridine (3la):** Prepared as shown in general procedure; pale yellow oil; eluent (petroleum ether/EtOAc = 2.5:1, v/v); yield is 85% (20.3 mg). <sup>1</sup>H NMR (400 MHz, CDCl<sub>3</sub>) δ 8.64 (ddd, *J* = 4.9, 1.9, 1.0 Hz, 1H), 7.73 (dd, *J* = 8.7, 6.1 Hz, 1H), 7.64 (d, *J* = 1.8 Hz, 1H), 7.48 (td, *J* = 7.7, 1.8 Hz, 1H), 7.34 (dd, *J* = 9.1, 2.6 Hz, 1H), 7.24 – 7.19 (m, 1H), 7.14 (d, *J* = 2.4 Hz, 2H), 6.76 – 6.70 (m, 1H), 6.23 (t, *J* = 2.2 Hz, 1H). <sup>13</sup>C NMR (151 MHz, CDCl<sub>3</sub>) δ 162.7(d, *J*<sub>C-F</sub> = 251 Hz), 155.6, 149.8, 141.0, 139.7(d, *J*<sub>C-F</sub> = 11 Hz), 136.2, 132.8(d, *J*<sub>C-F</sub> = 9 Hz), 131.6(d, *J*<sub>C-F</sub> = 3 Hz), 131.3, 123.6, 122.3, 115.6(d, *J*<sub>C-F</sub> = 21 Hz), 113.6(d, *J*<sub>C-F</sub> = 24 Hz), 107.1. HRMS (ESI) (*m/z*) Calculated for C<sub>14</sub>H<sub>11</sub>N<sub>3</sub>F<sup>+</sup> [*M* + *H*]<sup>+</sup>: 240.0932; found: 240.0934.

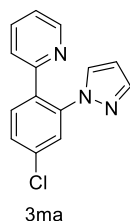

**2-(4-chloro-2-(1H-pyrazol-1-yl)phenyl)pyridine (3ma):** Prepared as shown in general procedure; pale yellow solid; eluent (petroleum ether/EtOAc = 2.5:1, v/v); yield is 86% (21.9 mg). <sup>1</sup>H NMR (400 MHz, CDCl<sub>3</sub>) δ 8.65 (ddd, *J* = 4.9, 1.9, 0.9 Hz, 1H), 7.72 (d, *J* = 8.3 Hz, 1H), 7.64 (dd, *J* = 9.4, 2.0 Hz, 2H), 7.53 – 7.46 (m, 2H), 7.22 – 7.15 (m, 2H), 6.74 (dt, *J* = 8.0, 1.0 Hz, 1H), 6.25 (t, *J* = 2.1 Hz, 1H). <sup>13</sup>C NMR (151 MHz, CDCl<sub>3</sub>) δ 155.3, 149.8, 141.0, 139.3, 136.3, 135.1, 134.0, 132.3, 131.3, 128.7, 126.6, 123.6, 122.5, 107.2. HRMS (ESI) (*m/z*) Calculated for C<sub>14</sub>H<sub>11</sub>N<sub>3</sub>Cl<sup>+</sup> [*M* + *H*]<sup>+</sup>: 256.0636; found: 256.0638.

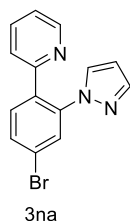

**2-(4-bromo-2-(1H-pyrazol-1-yl)phenyl)pyridine (3na):** Prepared as shown in general procedure; pale yellow oil; eluent (petroleum ether/EtOAc = 2.5:1, v/v); yield is 75% (22.4mg). <sup>1</sup>H NMR (400 MHz, CDCl<sub>3</sub>) 8.64 (dt, *J* = 4.8, 1.5 Hz, 1H), 7.78 (t, *J* = 1.2 Hz, 1H), 7.65 (d, *J* = 1.3 Hz, 3H), 7.50 (td, *J* = 7.7, 1.8 Hz, 1H), 7.23 – 7.15 (m, 2H), 6.75 (dt, *J* = 7.9, 1.1 Hz, 1H), 6.25 (t, *J* = 2.2 Hz, 1H). <sup>13</sup>C NMR (151 MHz, CDCl<sub>3</sub>) δ 155.3, 149.8, 141.0, 139.4, 136.3, 134.5, 132.4, 131.6, 131.3, 129.5, 123.6, 123.0, 122.6, 107.2. HRMS (ESI) (*m/z*) Calculated for C<sub>14</sub>H<sub>11</sub>N<sub>3</sub>Br<sup>+</sup> [*M* + *H*]<sup>+</sup>: 300.0131; found: 300.0130.

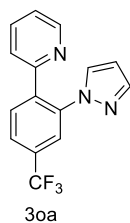

**2-(2-(1H-pyrazol-1-yl)-4-(trifluoromethyl)phenyl)pyridine (3oa):** Prepared as shown in general procedure; pale yellow solid; eluent (petroleum ether/EtOAc = 2.5:1, v/v); yield is 77% (22.3 mg). <sup>1</sup>H NMR (400 MHz, CDCl<sub>3</sub>) δ 8.74 – 8.62 (m, 1H), 7.92 – 7.87 (m, 2H), 7.80 – 7.73 (m, 1H), 7.67 (d, *J* = 1.8 Hz, 1H), 7.53 (td, *J* = 7.7, 1.8 Hz, 1H), 7.27 – 7.16 (m, 2H), 6.80 (d, *J* = 7.9 Hz, 1H), 6.27 (t, *J* = 2.1 Hz, 1H). <sup>13</sup>C NMR (151 MHz, CDCl<sub>3</sub>) δ 155.0, 150.0, 141.3, 138.9, 138.8, 136.4, 132.0, 131.7(q, *J*<sub>C-F</sub> = 33 Hz), 131.4, 125.0(q, *J*<sub>C-F</sub> = 3 Hz), 123.5(q, *J*<sub>C-F</sub> = 273 Hz), 123.7(q, *J*<sub>C-F</sub> = 12 Hz), 123.6, 122.9, 107.4. HRMS (ESI) (*m/z*) Calculated for C<sub>15</sub>H<sub>11</sub>N<sub>3</sub> F<sub>3</sub><sup>+</sup> [*M* + *H*]<sup>+</sup>: 290.0900 ; found: 290.0897.

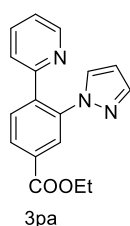

**ethyl 3-(1H-pyrazol-1-yl)-4-(pyridin-2-yl)benzoate (3pa):** Prepared as shown in general procedure; white solid; eluent (petroleum ether/EtOAc = 2:1, v/v); yield is 65% (19.1mg). <sup>1</sup>H NMR (400 MHz, CDCl<sub>3</sub>) δ 8.67 (ddd, *J* = 4.9, 1.9, 1.0 Hz, 1H), 8.26 (d, *J* = 1.7 Hz, 1H), 8.19 (dd, *J* = 8.0, 1.7 Hz, 1H), 7.87 (d, *J* = 8.1 Hz, 1H), 7.66 (dd, *J* = 1.9, 0.6 Hz, 1H), 7.52 (td, *J* = 7.7, 1.8 Hz, 1H), 7.27 – 7.19 (m, 2H), 6.79 (dt, *J* = 8.0, 1.1 Hz, 1H), 6.31 – 6.25 (m, 1H), 4.42 (q, *J* = 7.1 Hz, 2H), 1.41 (t, *J* = 7.1 Hz, 3H). <sup>13</sup>C NMR (151 MHz, CDCl<sub>3</sub>) δ 165.4, 155.4, 149.9, 140.9, 139.8, 138.7, 136.3, 131.6, 131.4, 131.3, 129.4, 127.8, 123.6, 122.7, 107.1, 61.5, 14.3. HRMS (ESI) (*m/z*) Calculated for C<sub>17</sub>H<sub>16</sub>N<sub>3</sub>O<sub>2</sub><sup>+</sup> [*M* + *H*]<sup>+</sup>: 294.1237; found: 294.1234.

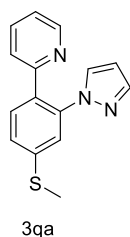

**2-(4-(methylthio)-2-(1H-pyrazol-1-yl)phenyl)pyridine (3qa):** Prepared as shown in general procedure; white solid; eluent (petroleum ether/EtOAc = 2:1, v/v); yield is 77% (20.6 mg). <sup>1</sup>H NMR (400 MHz, CDCl<sub>3</sub>) δ 8.64 (ddd, *J* = 4.9, 1.9, 1.0 Hz, 1H), 7.71 (d, *J* = 8.2 Hz, 1H), 7.66 (dd, *J* = 1.8, 0.6 Hz, 1H), 7.50 – 7.41 (m, 2H), 7.38 (dd, *J* = 8.3, 2.0 Hz, 1H), 7.20 – 7.13 (m, 2H), 6.69 (dt, *J* = 7.9, 1.1 Hz, 1H), 6.25 (t, *J* = 2.1 Hz, 1H), 2.54 (s, 3H). <sup>13</sup>C NMR (151 MHz, CDCl<sub>3</sub>) δ 155.8, 149.7,



141.0, 140.7, 138.9, 136.1, 132.1, 131.4, 131.2, 126.1, 123.4, 122.1, 106.9, 15.4. HRMS (ESI) (m/z) Calculated for C<sub>15</sub>H<sub>14</sub>N<sub>3</sub>S<sup>+</sup> [M + H]<sup>+</sup>: 268.0903; found: 268.0902.

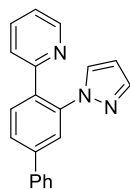

3ra

**2-(3-(1H-pyrazol-1-yl)-[1,1'-biphenyl]-4-yl)pyridine (3ra):** Prepared as shown in general procedure; pale yellow solid; eluent (petroleum ether/EtOAc = 3:1, v/v); yield is 79% (23.4 mg). <sup>1</sup>H NMR (400 MHz, CDCl<sub>3</sub>) δ 8.68 (ddd, *J* = 5.0, 1.8, 1.0 Hz, 1H), 7.88 (d, *J* = 8.1 Hz, 1H), 7.83 (d, *J* = 1.8 Hz, 1H), 7.76 (dd, *J* = 8.0, 1.9 Hz, 1H), 7.71 – 7.66 (m, 3H), 7.52 – 7.43 (m, 3H), 7.42 – 7.36 (m, 1H), 7.25 (d, *J* = 2.4 Hz, 1H), 7.18 (ddd, *J* = 7.5, 4.9, 1.2 Hz, 1H), 6.77 (dt, *J* = 8.0, 1.1 Hz, 1H), 6.27 (t, *J* = 2.1 Hz, 1H). <sup>13</sup>C NMR (101 MHz, CDCl<sub>3</sub>) δ 156.0, 149.8, 142.6, 140.7, 139.4, 139.0, 136.1, 134.5, 131.6, 131.5, 129.0, 128.1, 127.2, 127.2, 125.2, 123.8, 122.3, 106.9. HRMS (ESI) (m/z) Calculated for C<sub>20</sub>H<sub>16</sub>N<sub>3</sub><sup>+</sup> [M + H]<sup>+</sup>: 298.1339; found: 298.1339.

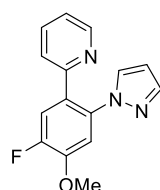

3sa

**2-(5-fluoro-4-methoxy-2-(1H-pyrazol-1-yl)phenyl)pyridine (3s):** Prepared as shown in general procedure; white solid; eluent (petroleum ether/EtOAc = 3:1, v/v); yield is 94% (25.3 mg). <sup>1</sup>H NMR (400 MHz, CDCl<sub>3</sub>) δ 8.61 (ddd, *J* = 4.9, 1.9, 1.0 Hz, 1H), 7.66 (d, *J* = 1.9 Hz, 1H), 7.55 (d, *J* = 11.7 Hz, 1H), 7.43 (td, *J* = 7.8, 1.8 Hz, 1H), 7.19 – 7.06 (m, 3H), 6.60 (dt, *J* = 7.9, 1.1 Hz, 1H), 6.23 (t, *J* = 2.1 Hz, 1H), 3.94 (s, 3H). <sup>13</sup>C NMR (101 MHz, CDCl<sub>3</sub>) δ 154.7(d, *J*<sub>C-F</sub> = 2 Hz), 152.0(d, *J*<sub>C-F</sub> = 249 Hz), 149.7, 148.3(d, *J*<sub>C-F</sub> = 11 Hz), 140.7, 136.2, 134.6(d, *J*<sub>C-F</sub> = 3 Hz), 131.7, 128.6(d, *J*<sub>C-F</sub> = 7 Hz), 122.8(d, *J*<sub>C-F</sub> = 8 Hz), 118.0, 117.8, 111.7(d, *J*<sub>C-F</sub> = 2 Hz), 107.0, 56.5. HRMS (ESI) (m/z) Calculated for C<sub>15</sub>H<sub>13</sub>N<sub>3</sub>OF<sup>+</sup> [M + H]<sup>+</sup>: 270.1037; found: 270.1037.

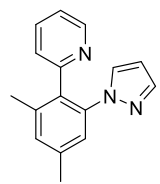

3ta

**2-(2,4-dimethyl-6-(1H-pyrazol-1-yl)phenyl)pyridine (3ta):** Prepared as shown in general procedure; pale yellow oil; eluent (petroleum ether/EtOAc = 3:1, v/v); yield is 84% (20.9mg). <sup>1</sup>H NMR (400 MHz, CDCl<sub>3</sub>) δ 8.62 (ddd, *J* = 5.0, 1.8, 1.0 Hz, 1H), 7.53 (td, *J* = 7.7, 1.8 Hz, 1H), 7.48 (d, *J* = 1.9 Hz, 1H), 7.26 – 7.24 (m, 1H), 7.19 – 7.13 (m, 2H), 7.04 (d, *J* = 2.4 Hz, 1H), 6.94 (dt, *J* = 7.9, 1.1 Hz, 1H), 6.05 (t, *J* = 2.1 Hz, 1H), 2.39 (s, 3H), 2.14 (s, 3H). <sup>13</sup>C NMR (101 MHz, CDCl<sub>3</sub>) δ 156.9, 149.1, 139.9, 139.1, 139.0, 137.7, 136.5, 132.7, 131.3, 130.9, 124.8, 124.1, 122.1, 106.0, 21.1, 20.1. HRMS (ESI) (m/z) Calculated for C<sub>16</sub>H<sub>16</sub>N<sub>3</sub><sup>+</sup> [M + H]<sup>+</sup>: 250.1339; found: 250.1339.

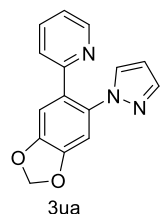

3ua

**2-(6-(1H-pyrazol-1-yl)benzo[d][1,3]dioxol-5-yl)pyridine (3ua):** Prepared as shown in general procedure; pale yellow solid; eluent (petroleum ether/EtOAc = 2.5:1, v/v); yield is 51% (13.6 mg). <sup>1</sup>H NMR (400 MHz, CDCl<sub>3</sub>) δ 8.62 – 8.55 (m, 1H), 7.70 (d, *J* = 1.8 Hz, 1H), 7.43 (td, *J* = 7.7, 1.8 Hz, 1H), 7.35 – 7.23 (m, 2H), 7.12 (ddd, *J* = 7.6, 4.9, 1.1 Hz, 1H), 6.98 (d, *J* = 8.2 Hz, 1H), 6.68 (dt, *J* = 8.0, 1.1 Hz, 1H), 6.29 (t, *J* = 2.2 Hz, 1H), 6.11 (s, 2H). <sup>13</sup>C NMR (101 MHz, CDCl<sub>3</sub>) δ 155.6, 149.5, 149.2, 143.3, 140.9, 136.1, 132.0, 131.1, 124.4, 123.1, 122.0, 121.8, 108.8, 106.8, 102.6. HRMS (ESI) (m/z) Calculated for C<sub>15</sub>H<sub>12</sub>N<sub>3</sub>O<sub>2</sub><sup>+</sup> [M + H]<sup>+</sup>: 266.0924; found: 266.0922.

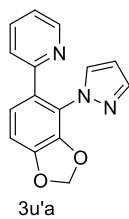

**2-(4-(1H-pyrazol-1-yl)benzo[d][1,3]dioxol-5-yl)pyridine (3u'a):** Prepared as shown in general procedure; pale yellow solid; eluent (petroleum ether/EtOAc = 2.5, v/v); yield is 37% (9.8 mg). <sup>1</sup>H NMR (400 MHz, CDCl<sub>3</sub>) δ 8.61 (ddd, *J* = 4.8, 1.8, 1.0 Hz, 1H), 7.62 (d, *J* = 1.8 Hz, 1H), 7.41 (td, *J* = 7.8, 1.9 Hz, 1H), 7.24 (s, 1H), 7.14 – 7.07 (m, 2H), 7.01 (s, 1H), 6.60 (dd, *J* = 8.0, 1.0 Hz, 1H), 6.19 (t, *J* = 2.1 Hz, 1H), 6.08 (s, 2H). <sup>13</sup>C NMR (101 MHz, CDCl<sub>3</sub>) δ 155.9, 149.6, 148.3, 148.0, 140.4, 136.1, 133.0, 131.7, 130.3, 123.4, 122.0, 109.9, 107.5, 106.6, 102.2. HRMS (ESI) (*m/z*) Calculated for C<sub>15</sub>H<sub>12</sub>N<sub>3</sub>O<sub>2</sub><sup>+</sup> [*M* + *H*]<sup>+</sup>: 266.0924; found: 266.0923.

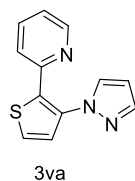

**2-(3-(1H-pyrazol-1-yl)thiophen-2-yl)pyridine (3va):** Prepared as shown in general procedure; pale yellow solid; eluent (petroleum ether/EtOAc = 2:1, v/v); yield is 64% (14.6 mg). <sup>1</sup>H NMR (400 MHz, CDCl<sub>3</sub>) δ 8.57 (ddd, *J* = 4.9, 1.9, 1.0 Hz, 1H), 7.80 – 7.72 (m, 1H), 7.53 (dd, *J* = 2.4, 0.6 Hz, 1H), 7.48 (td, *J* = 7.8, 1.8 Hz, 1H), 7.42 (d, *J* = 5.3 Hz, 1H), 7.18 (d, *J* = 5.3 Hz, 1H), 7.13 (ddd, *J* = 7.5, 4.9, 1.1 Hz, 1H), 6.55 (dt, *J* = 8.1, 1.1 Hz, 1H), 6.43 (t, *J* = 2.1 Hz, 1H). <sup>13</sup>C NMR (151 MHz, CDCl<sub>3</sub>) δ 150.5, 149.5, 141.00, 137.0, 136.6, 135.3, 131.0, 127.1, 126.5, 122.6, 120.8, 107.1. HRMS (ESI) (*m/z*) Calculated for C<sub>12</sub>H<sub>10</sub>N<sub>3</sub>S<sup>+</sup> [*M* + *H*]<sup>+</sup>: 228.0590; found: 228.0590.

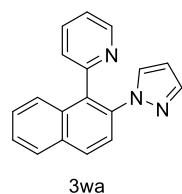

**2-(2-(1H-pyrazol-1-yl)naphthalen-1-yl)pyridine (3wa):** Prepared as shown in general procedure; white solid; eluent (petroleum ether/EtOAc = 2:1, v/v); yield is 51% (13.8 mg). <sup>1</sup>H NMR (400 MHz, CDCl<sub>3</sub>) δ 8.80 (ddd, *J* = 5.0, 1.9, 1.0 Hz, 1H), 8.08 – 7.99 (m, 1H), 7.98 – 7.90 (m, 1H), 7.78 (d, *J* = 8.8 Hz, 1H), 7.65 (td, *J* = 7.7, 1.8 Hz, 1H), 7.62 – 7.57 (m, 2H), 7.54 (ddd, *J* = 8.2, 6.9, 1.4 Hz, 1H), 7.47 (ddd, *J* = 8.3, 6.8, 1.4 Hz, 1H), 7.30 (ddd, *J* = 7.6, 5.0, 1.2 Hz, 1H), 7.16 – 7.09 (m, 2H), 6.12 (t, *J* = 2.1 Hz, 1H). <sup>13</sup>C NMR (151 MHz, CDCl<sub>3</sub>) δ 156.1, 149.5, 140.5, 136.8, 136.6, 132.9, 132.3, 131.8, 131.8, 129.9, 128.1, 127.2, 126.5, 126.2, 125.6, 123.8, 122.5, 106.3. HRMS (ESI) (*m/z*) Calculated for C<sub>18</sub>H<sub>14</sub>N<sub>3</sub><sup>+</sup> [*M* + *H*]<sup>+</sup>: 272.1182; found: 272.1180.

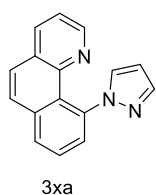

**10-(1H-pyrazol-1-yl)benzo[h]quinoline (3xa):** Prepared as shown in general procedure; white solid; eluent (petroleum ether/EtOAc = 5:1, v/v); yield is 83% (20.4 mg). <sup>1</sup>H NMR (400 MHz, CDCl<sub>3</sub>) δ 8.47 (dd, *J* = 4.3, 1.9 Hz, 1H), 7.98 (dd, *J* = 8.0, 1.9 Hz, 1H), 7.92 (dd, *J* = 6.9, 2.4 Hz, 1H), 7.78 – 7.69 (m, 2H), 7.67 – 7.62 (m, 2H), 7.60 (d, *J* = 8.8 Hz, 1H), 7.58 (d, *J* = 2.4 Hz, 1H), 7.27 (dd, *J* = 8.0, 4.3 Hz, 1H), 6.44 (t, *J* = 2.1 Hz, 1H). <sup>13</sup>C NMR (151 MHz, CDCl<sub>3</sub>) δ 147.4, 144.4, 138.5, 137.5, 134.4, 134.3, 130.8, 128.8, 127.6, 126.6, 126.3, 126.2, 126.1, 125.7, 120.7, 104.8. HRMS (ESI) (*m/z*) Calculated for C<sub>16</sub>H<sub>12</sub>N<sub>3</sub><sup>+</sup> [*M* + *H*]<sup>+</sup>: 246.1026; found: 246.1025.

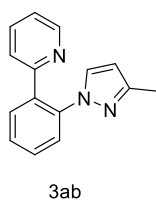

**2-(2-(3-methyl-1H-pyrazol-1-yl)phenyl)pyridine (3ab):** Prepared as shown in general procedure; yellow oil; eluent (petroleum ether/EtOAc = 3:1, v/v); yield is 78% (18.4 mg). <sup>1</sup>H NMR (400 MHz, CDCl<sub>3</sub>) δ 8.66 (dt, *J* = 4.9, 1.3 Hz, 1H), 7.77 – 7.71 (m, 1H), 7.62 – 7.57 (m, 1H), 7.53 – 7.48 (m, 2H), 7.48 – 7.44 (m, 1H), 7.17 (ddd, *J* = 7.5, 4.9, 1.1 Hz, 1H), 7.00 (d, *J* = 2.3 Hz, 1H), 6.84 – 6.77 (m, 1H), 5.99 (d, *J* = 2.3 Hz, 1H), 2.32 (s, 3H). <sup>13</sup>C NMR (101 MHz, CDCl<sub>3</sub>) δ 156.5, 149.9,

149.7, 138.7, 136.1, 135.4, 132.1, 131.0, 129.5, 128.2, 126.4, 123.8, 122.1, 106.6, 13.6. HRMS (ESI) (m/z) Calculated for  $C_{15}H_{14}N_3^+$  [M + H]<sup>+</sup>: 236.1182; found: 236.1182.

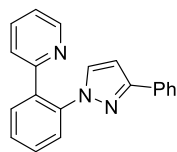

3ac

**2-(2-(3-phenyl-1H-pyrazol-1-yl)phenyl)pyridine (3ac):** Prepared as shown in general procedure; white solid; eluent (petroleum ether/EtOAc = 3:1, v/v); yield is 83% (24.7 mg). <sup>1</sup>H NMR (400 MHz, CDCl<sub>3</sub>) δ 8.67 (d, *J* = 5.0 Hz, 1H), 7.82 (d, *J* = 7.6 Hz, 2H), 7.79 (dd, *J* = 6.4, 2.8 Hz, 1H), 7.71 – 7.66 (m, 1H), 7.54 (dt, *J* = 5.8, 2.3 Hz, 2H), 7.52 – 7.46 (m, 1H), 7.40 (t, *J* = 7.5 Hz, 2H), 7.32 (t, *J* = 7.3 Hz, 1H), 7.22 – 7.20 (m, 1H), 7.19 – 7.15 (m, 1H), 6.91 (d, *J* = 7.9 Hz, 1H), 6.55 (d, *J* = 2.5 Hz, 1H). <sup>13</sup>C NMR (101 MHz, CDCl<sub>3</sub>) δ 156.4, 152.5, 149.7, 138.6, 136.2, 135.7, 133.1, 132.8, 131.1, 129.6, 128.6, 128.6, 127.9, 126.5, 125.78, 123.8, 122.2, 104.1. HRMS (ESI) (m/z) Calculated for  $C_{20}H_{16}N_3^+$  [M + H]<sup>+</sup>: 298.1339; found: 298.1338.

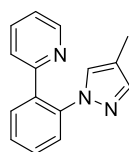

3ad

**2-(2-(4-methyl-1H-pyrazol-1-yl)phenyl)pyridine (3ad):** Prepared as shown in general procedure; yellow oil; eluent (petroleum ether/EtOAc = 3:1, v/v); yield is 85% (20.1 mg). <sup>1</sup>H NMR (400 MHz, CDCl<sub>3</sub>) δ 8.65 (ddd, *J* = 4.9, 1.8, 1.0 Hz, 1H), 7.78 – 7.71 (m, 1H), 7.57 – 7.52 (m, 1H), 7.52 – 7.48 (m, 2H), 7.48 (d, *J* = 2.5 Hz, 1H), 7.43 (s, 1H), 7.17 (ddd, *J* = 7.5, 4.9, 1.2 Hz, 1H), 6.98 – 6.94 (m, 1H), 6.79 (dt, *J* = 8.0, 1.1 Hz, 1H), 1.99 (s, 3H). <sup>13</sup>C NMR (101 MHz, CDCl<sub>3</sub>) δ 156.5, 149.7, 141.3, 138.8, 136.0, 135.5, 131.1, 129.9, 129.4, 128.3, 126.3, 123.7, 122.2, 117.2, 8.8. HRMS (ESI) (m/z) Calculated for  $C_{15}H_{14}N_3^+$  [M + H]<sup>+</sup>: 236.1182; found: 236.1182.

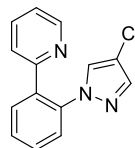

3ae

**2-(2-(4-chloro-1H-pyrazol-1-yl)phenyl)pyridine (3ae):** Prepared as shown in general procedure; white solid; eluent (petroleum ether/EtOAc = 3:1, v/v); yield is 78% (20.0 mg). <sup>1</sup>H NMR (400 MHz, CDCl<sub>3</sub>) δ 8.68 – 8.62 (m, 1H), 7.78 – 7.70 (m, 1H), 7.59 – 7.54 (m, 2H), 7.53 (t, *J* = 1.9 Hz, 2H), 7.52 (s, 1H), 7.25 – 7.17 (m, 2H), 6.87 (dd, *J* = 7.9, 1.1 Hz, 1H). <sup>13</sup>C NMR (101 MHz, CDCl<sub>3</sub>) δ 156.0, 149.9, 139.0, 138.1, 136.3, 135.8, 131.2, 129.6, 129.1, 129.1, 126.3, 123.5, 122.5, 111.3. HRMS (ESI) (m/z) Calculated for  $C_{14}H_{11}N_3Cl^+$  [M + H]<sup>+</sup>: 256.0636; found: 256.0636.

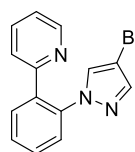

3af

**2-(2-(4-bromo-1H-pyrazol-1-yl)phenyl)pyridine (3af):** Prepared as shown in general procedure; yellow oil; eluent (petroleum ether/EtOAc = 3:1, v/v); yield is 53% (15.9 mg). <sup>1</sup>H NMR (400 MHz, CDCl<sub>3</sub>) δ 8.65 (dt, *J* = 4.8, 1.4 Hz, 1H), 7.78 – 7.71 (m, 1H), 7.57 (s, 1H), 7.57 – 7.53 (m, 2H), 7.52 (s, 2H), 7.26 (s, 1H), 7.21 (ddd, *J* = 7.6, 4.9, 1.2 Hz, 1H), 6.86 (dd, *J* = 7.9, 1.1 Hz, 1H). <sup>13</sup>C NMR (101 MHz, CDCl<sub>3</sub>) δ 156.0, 149.8, 141.1, 138.1, 136.3, 135.9, 131.3, 131.2, 129.6, 129.1, 126.3, 123.5, 122.5, 94.5. HRMS (ESI) (m/z) Calculated for  $C_{14}H_{11}N_3Br^+$  [M + H]<sup>+</sup>: 300.0131; found: 300.0129.

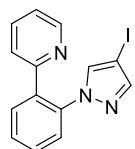

3ag

**2-(2-(4-iodo-1H-pyrazol-1-yl)phenyl)pyridine (3ag):** Prepared as shown in general procedure; yellow solid; eluent (petroleum ether/EtOAc = 3:1, v/v); yield is 80% (27.7 mg). <sup>1</sup>H NMR (400 MHz, CDCl<sub>3</sub>) δ 8.64 (ddd, *J* = 4.9, 1.8, 1.0 Hz, 1H), 7.79 – 7.71 (m, 1H), 7.62 (s, 1H), 7.57 – 7.52 (m, 2H), 7.52 (s, 2H), 7.28 (s, 1H), 7.20 (ddd, *J* = 7.6, 4.9, 1.1 Hz, 1H), 6.84 (dt, *J* = 7.9, 1.1 Hz, 1H). <sup>13</sup>C NMR (101 MHz, CDCl<sub>3</sub>) δ 156.0, 149.8, 145.5, 137.9, 136.3, 135.9, 135.5, 131.2, 129.6, 129.1, 126.3,

123.5, 122.4, 57.6. HRMS (ESI) (m/z) Calculated for C<sub>14</sub>H<sub>11</sub>N<sub>3</sub>I<sup>+</sup> [M + H]<sup>+</sup>: 347.9992; found: 347.9990.

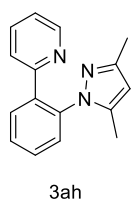

**2-(2-(3,5-dimethyl-1H-pyrazol-1-yl)phenyl)pyridine (3ah):** Prepared as shown in general procedure; yellow solid; eluent (petroleum ether/EtOAc = 3:1, v/v); yield is 50% (12.5 mg). <sup>1</sup>H NMR (400 MHz, CDCl<sub>3</sub>) δ 8.67 – 8.61 (m, 1H), 7.89 (dd, *J* = 7.3, 1.8 Hz, 1H), 7.56 – 7.48 (m, 2H), 7.48 – 7.41 (m, 2H), 7.13 (ddd, *J* = 7.6, 4.8, 1.2 Hz, 1H), 6.65 (d, *J* = 8.0 Hz, 1H), 5.77 (s, 1H), 2.29 (s, 3H), 1.60 (s, 3H). <sup>13</sup>C NMR (101 MHz, CDCl<sub>3</sub>) δ 155.9, 149.7, 148.9, 140.8, 137.7, 137.4, 136.2, 130.7, 129.5, 129.3, 128.6, 123.5, 122.1, 105.9, 13.6, 11.0. HRMS (ESI) (m/z) Calculated for C<sub>16</sub>H<sub>16</sub>N<sub>3</sub><sup>+</sup> [M + H]<sup>+</sup>: 250.1339; found: 250.1339.

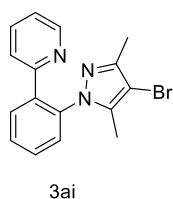

**2-(2-(4-bromo-3,5-dimethyl-1H-pyrazol-1-yl)phenyl)pyridine (3ai):** Prepared as shown in general procedure; yellow solid; eluent (petroleum ether/EtOAc = 3:1, v/v); yield is 62% (20.3 mg). <sup>1</sup>H NMR (400 MHz, CDCl<sub>3</sub>) δ 8.65 (ddd, *J* = 4.9, 1.9, 1.0 Hz, 1H), 7.88 (dd, *J* = 7.6, 1.7 Hz, 1H), 7.57 (td, *J* = 7.5, 1.6 Hz, 1H), 7.50 (dtd, *J* = 13.7, 7.8, 1.8 Hz, 2H), 7.42 (dd, *J* = 7.7, 1.5 Hz, 1H), 7.17 (ddd, *J* = 7.5, 4.9, 1.1 Hz, 1H), 6.68 (dt, *J* = 7.9, 1.1 Hz, 1H), 2.29 (s, 3H), 1.62 (s, 3H). <sup>13</sup>C NMR (101 MHz, CDCl<sub>3</sub>) δ 155.6, 149.9, 147.5, 139.1, 137.7, 137.3, 136.3, 130.8, 129.7, 128.3, 123.3, 122.3, 95.2, 12.5, 10.5. HRMS (ESI) (m/z) Calculated for C<sub>16</sub>H<sub>15</sub>N<sub>3</sub>Br<sup>+</sup> [M + H]<sup>+</sup>: 328.0444; found: 328.0443.

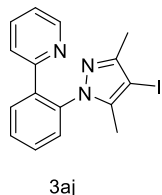

**2-(2-(4-iodo-3,5-dimethyl-1H-pyrazol-1-yl)phenyl)pyridine (3aj):** Prepared as shown in general procedure; yellow solid; eluent (petroleum ether/EtOAc = 3:1, v/v); yield is 53% (19.9 mg). <sup>1</sup>H NMR (400 MHz, CDCl<sub>3</sub>) δ 8.65 (ddd, *J* = 4.9, 1.9, 1.0 Hz, 1H), 7.88 (dd, *J* = 7.6, 1.8 Hz, 1H), 7.57 (td, *J* = 7.5, 1.5 Hz, 1H), 7.50 (dtd, *J* = 17.2, 7.7, 1.8 Hz, 2H), 7.42 (dd, *J* = 7.7, 1.5 Hz, 1H), 7.17 (ddd, *J* = 7.5, 4.9, 1.1 Hz, 1H), 6.66 (dt, *J* = 8.0, 1.1 Hz, 1H), 2.30 (s, 3H), 1.66 (s, 3H). <sup>13</sup>C NMR (101 MHz, CDCl<sub>3</sub>) δ 155.5, 150.7, 149.8, 142.5, 137.7, 137.5, 136.2, 130.8, 129.7, 129.6, 128.2, 123.3, 122.3, 63.6, 14.2, 12.1. HRMS (ESI) (m/z) Calculated for C<sub>16</sub>H<sub>15</sub>N<sub>3</sub>I<sup>+</sup> [M + H]<sup>+</sup>: 376.0305; found: 376.0305.

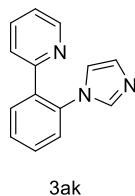

**2-(2-(1H-imidazol-1-yl)phenyl)pyridine (3ak):** Prepared as shown in general procedure; yellow solid; eluent (petroleum ether/EtOAc = 1:1, v/v); yield is 50% (11.1 mg). <sup>1</sup>H NMR (400 MHz, CDCl<sub>3</sub>) δ 8.69 – 8.60 (m, 1H), 7.77 (dd, *J* = 7.2, 2.2 Hz, 1H), 7.54 (ddd, *J* = 8.7, 6.4, 2.3 Hz, 2H), 7.51 – 7.47 (m, 1H), 7.45 – 7.36 (m, 2H), 7.19 (dd, *J* = 7.6, 4.9 Hz, 1H), 7.04 (s, 1H), 6.88 (d, *J* = 1.5 Hz, 1H), 6.82 (d, *J* = 7.9 Hz, 1H). <sup>13</sup>C NMR (101 MHz, CDCl<sub>3</sub>) δ 155.7, 149.9, 137.5, 136.5, 136.4, 135.2, 131.5, 129.7, 129.6, 128.9, 126.4, 123.1, 122.5, 120.6. HRMS (ESI) (m/z) Calculated for C<sub>14</sub>H<sub>12</sub>N<sub>3</sub><sup>+</sup> [M + H]<sup>+</sup>: 222.1026; found: 222.1026.

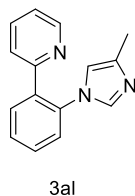

**2-(2-(4-methyl-1H-imidazol-1-yl)phenyl)pyridine (3al):** Prepared as shown in general procedure; yellow solid; eluent (petroleum ether/EtOAc = 1:1, v/v); yield is 64% (15.1 mg). <sup>1</sup>H NMR (400 MHz, CDCl<sub>3</sub>) δ 8.65 (dt, *J* = 4.9, 1.4 Hz, 1H), 7.80 – 7.74 (m, 1H), 7.54 (dd, *J* = 7.5, 1.9 Hz, 1H), 7.52 – 7.46 (m, 2H), 7.38 – 7.33 (m, 1H), 7.30 – 7.26 (m, 1H), 7.20 (ddd, *J* = 7.6, 4.9, 1.2 Hz, 1H), 6.89 – 6.82 (m, 1H), 6.61 (s, 1H), 2.27 – 2.14 (m, 3H). <sup>13</sup>C NMR (101 MHz, CDCl<sub>3</sub>) δ 155.8, 149.9, 138.7, 136.6, 136.4, 136.2, 135.3, 131.5, 129.6, 128.6, 126.3, 123.2, 122.5, 116.9, 13.6. HRMS (ESI) (*m/z*) Calculated for C<sub>15</sub>H<sub>14</sub>N<sub>3</sub><sup>+</sup> [*M* + *H*]<sup>+</sup>: 236.1182; found: 236.1180.

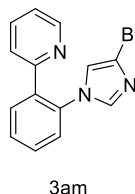

**2-(2-(4-bromo-1H-imidazol-1-yl)phenyl)pyridine (3am):** Prepared as shown in general procedure; yellow solid; eluent (petroleum ether/EtOAc = 1:1, v/v); yield is 80% (24.0 mg). <sup>1</sup>H NMR (400 MHz, CDCl<sub>3</sub>) δ 8.65 (d, *J* = 5.0 Hz, 1H), 7.77 (dd, *J* = 7.5, 1.8 Hz, 1H), 7.61 (td, *J* = 6.8, 6.0, 1.7 Hz, 1H), 7.59 – 7.51 (m, 2H), 7.42 – 7.35 (m, 1H), 7.29 (d, *J* = 1.6 Hz, 1H), 7.24 (dd, *J* = 7.6, 4.9 Hz, 1H), 6.95 (d, *J* = 7.9 Hz, 1H), 6.91 (d, *J* = 1.6 Hz, 1H). <sup>13</sup>C NMR (101 MHz, CDCl<sub>3</sub>) δ 155.3, 150.1, 137.3, 136.7, 136.5, 134.4, 131.6, 129.8, 129.4, 126.3, 123.1, 122.8, 119.7, 115.9. HRMS (ESI) (*m/z*) Calculated for C<sub>14</sub>H<sub>11</sub>N<sub>3</sub>Br<sup>+</sup> [*M* + *H*]<sup>+</sup>: 300.0131; found: 300.0129.

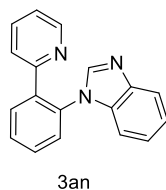

**1-(2-(pyridin-2-yl)phenyl)-1H-benzo[d]imidazole (3an):** Prepared as shown in general procedure; yellow solid; eluent (petroleum ether/EtOAc = 1:1, v/v); yield is 68% (18.5 mg). <sup>1</sup>H NMR (400 MHz, CDCl<sub>3</sub>) δ 8.63 – 8.55 (m, 1H), 7.90 (dd, *J* = 7.3, 2.1 Hz, 1H), 7.82 – 7.75 (m, 2H), 7.62 (dtd, *J* = 14.0, 7.4, 1.8 Hz, 2H), 7.52 (dd, *J* = 7.3, 1.9 Hz, 1H), 7.33 (td, *J* = 7.7, 1.8 Hz, 1H), 7.26 (tt, *J* = 5.4, 3.0 Hz, 1H), 7.21 (q, *J* = 4.0, 2.5 Hz, 2H), 7.08 (dd, *J* = 7.6, 4.9 Hz, 1H), 6.71 (d, *J* = 7.9 Hz, 1H). <sup>13</sup>C NMR (101 MHz, CDCl<sub>3</sub>) δ 155.5, 145.0, 143.3, 137.7, 136.4, 134.5, 133.5, 131.8, 129.9, 129.4, 127.4, 123.6, 122.9, 122.5, 122.5, 120.3, 110.4. HRMS (ESI) (*m/z*) Calculated for C<sub>18</sub>H<sub>14</sub>N<sub>3</sub><sup>+</sup> [*M* + *H*]<sup>+</sup>: 272.1182; found: 272.1182.

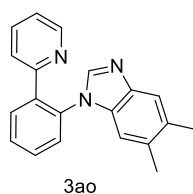

**5,6-dimethyl-1-(2-(pyridin-2-yl)phenyl)-1H-benzo[d]imidazole (3ao):** Prepared as shown in general procedure; yellow solid; eluent (petroleum ether/EtOAc = 1:1, v/v); yield is 67% (18.5 mg). <sup>1</sup>H NMR (400 MHz, CDCl<sub>3</sub>) δ 8.64 – 8.58 (m, 1H), 7.93 – 7.87 (m, 1H), 7.64 – 7.61 (m, 1H), 7.60 (d, *J* = 2.8 Hz, 2H), 7.54 (s, 1H), 7.52 – 7.48 (m, 1H), 7.33 (td, *J* = 7.7, 1.9 Hz, 1H), 7.09 (ddd, *J* = 7.6, 4.9, 1.2 Hz, 1H), 7.01 (s, 1H), 6.68 (d, *J* = 7.8 Hz, 1H), 2.36 (s, 3H), 2.28 (s, 3H). <sup>13</sup>C NMR (101 MHz, CDCl<sub>3</sub>) δ 155.6, 145.0, 142.5, 141.9, 137.6, 136.4, 133.8, 133.0, 132.9, 131.7, 131.5, 129.8, 129.1, 127.3, 123.0, 122.5, 120.3, 110.5, 20.4, 20.3. HRMS (ESI) (*m/z*) Calculated for C<sub>20</sub>H<sub>18</sub>N<sub>3</sub><sup>+</sup> [*M* + *H*]<sup>+</sup>: 300.1495; found: 300.1495.

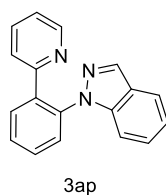

**1-(2-(pyridin-2-yl)phenyl)-1H-indazole (3ap):** Prepared as shown in general procedure; yellow solid; eluent (petroleum ether/EtOAc = 1:1, v/v); yield is 95% (25.8 mg). <sup>1</sup>H NMR (400 MHz, CDCl<sub>3</sub>) δ 8.62 – 8.53 (m, 1H), 8.14 (s, 1H), 7.97 – 7.90 (m, 1H), 7.68 (d, *J* = 8.0 Hz, 1H), 7.61 (d, *J* = 5.5 Hz, 1H), 7.59 (d, *J* = 2.3 Hz, 2H), 7.19 (td, *J* = 7.7, 1.9 Hz, 1H), 7.16 – 7.10 (m, 1H), 7.08 – 7.00 (m, 2H), 6.98 (dd, *J* = 7.6, 4.9 Hz, 1H), 6.60 (d, *J* = 8.0 Hz, 1H). <sup>13</sup>C NMR (101 MHz,

CDCl<sub>3</sub>)  $\delta$  156.2, 149.7, 140.0, 137.3, 137.1, 135.8, 135.1, 131.3, 129.7, 128.9, 127.9, 126.7, 124.3, 123.2, 121.9, 121.0, 120.7, 110.1. HRMS (ESI) (m/z) Calculated for C<sub>18</sub>H<sub>14</sub>N<sub>3</sub><sup>+</sup> [M + H]<sup>+</sup>: 272.1182; found: 272.1181.

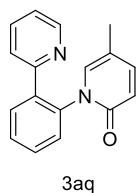

**5-methyl-1-(2-(pyridin-2-yl)phenyl)pyridin-2(1H)-one (3aq):** Prepared as shown in general procedure; yellow solid; eluent (petroleum ether/EtOAc = 3:1, v/v); yield is 69% (18.1 mg). <sup>1</sup>H NMR (400 MHz, CDCl<sub>3</sub>)  $\delta$  8.68 – 8.62 (m, 1H), 7.97 (d, *J* = 2.5 Hz, 1H), 7.89 (dd, *J* = 7.7, 1.9 Hz, 1H), 7.75 (d, *J* = 7.9 Hz, 1H), 7.59 (td, *J* = 7.8, 1.9 Hz, 1H), 7.44 – 7.37 (m, 2H), 7.32 (td, *J* = 7.5, 1.3 Hz, 1H), 7.17 – 7.10 (m, 2H), 6.67 (d, *J* = 8.3 Hz, 1H), 2.22 (s, 3H). <sup>13</sup>C NMR (101 MHz, CDCl<sub>3</sub>)  $\delta$  161.9, 155.3, 151.8, 149.5, 147.6, 140.2, 135.9, 133.0, 131.4, 130.0, 127.7, 125.3, 124.6, 122.2, 122.0, 110.6, 17.5. HRMS (ESI) (m/z) Calculated for C<sub>17</sub>H<sub>15</sub>N<sub>2</sub>O<sup>+</sup> [M + H]<sup>+</sup>: 263.1179; found: 263.1179.

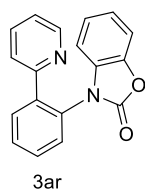

**3-(2-(pyridin-2-yl)phenyl)benzo[d]oxazol-2(3H)-one (3ar):** Prepared as shown in general procedure; yellow solid; eluent (petroleum ether/EtOAc = 3:1, v/v); yield is 70% (20.2 mg). <sup>1</sup>H NMR (400 MHz, CDCl<sub>3</sub>)  $\delta$  8.47 (dt, *J* = 4.9, 1.3 Hz, 1H), 7.83 – 7.78 (m, 1H), 7.62 (ddq, *J* = 9.2, 4.5, 2.1 Hz, 2H), 7.58 – 7.51 (m, 2H), 7.39 – 7.34 (m, 1H), 7.16 (dd, *J* = 8.0, 1.3 Hz, 1H), 7.09 (ddd, *J* = 7.6, 4.9, 1.2 Hz, 1H), 7.03 (td, *J* = 7.8, 1.4 Hz, 1H), 6.96 (td, *J* = 7.7, 1.3 Hz, 1H), 6.62 (dd, *J* = 7.7, 1.4 Hz, 1H). <sup>13</sup>C NMR (101 MHz, CDCl<sub>3</sub>)  $\delta$  156.0, 153.5, 149.7, 142.6, 138.6, 136.6, 132.0, 131.4, 130.7, 130.0, 129.9, 128.7, 123.8, 123.0, 122.6, 122.4, 109.8, 109.3. HRMS (ESI) (m/z) Calculated for C<sub>18</sub>H<sub>13</sub>N<sub>2</sub>O<sub>2</sub><sup>+</sup> [M + H]<sup>+</sup>: 289.0972; found: 289.0972.

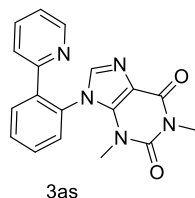

**1,3-dimethyl-9-(2-(pyridin-2-yl)phenyl)-3,9-dihydro-1H-purine-2,6-dione (3as):** Prepared as shown in general procedure; white solid; eluent (petroleum ether/EtOAc = 1:1, v/v); yield is 66% (22.1 mg). <sup>1</sup>H NMR (400 MHz, CDCl<sub>3</sub>)  $\delta$  8.50 (d, *J* = 4.9 Hz, 1H), 7.71 (d, *J* = 7.6 Hz, 1H), 7.62 (d, *J* = 7.5 Hz, 1H), 7.57 (q, *J* = 6.9 Hz, 2H), 7.48 (d, *J* = 4.8 Hz, 2H), 7.20 – 7.06 (m, 2H), 3.58 (s, 3H), 3.31 (s, 3H). <sup>13</sup>C NMR (101 MHz, CDCl<sub>3</sub>)  $\delta$  155.9, 154.3, 151.7, 149.6, 148.8, 142.7, 137.7, 136.5, 132.7, 130.8, 130.0, 129.3, 128.1, 123.5, 122.5, 108.0, 29.9, 28.0. HRMS (ESI) (m/z) Calculated for C<sub>18</sub>H<sub>16</sub>N<sub>5</sub>O<sub>2</sub><sup>+</sup> [M + H]<sup>+</sup>: 334.1299; found: 334.1307.

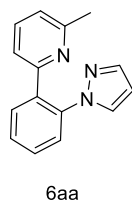

**2-(2-(1H-pyrazol-1-yl)phenyl)-6-methylpyridine (6aa):** Prepared as shown in general procedure; yellow oil; eluent (petroleum ether/EtOAc = 3:1, v/v); yield is 22% (5.2 mg). <sup>1</sup>H NMR (400 MHz, CDCl<sub>3</sub>)  $\delta$  7.79 – 7.71 (m, 1H), 7.63 (dd, *J* = 1.8, 0.6 Hz, 1H), 7.60 – 7.55 (m, 1H), 7.54 – 7.47 (m, 2H), 7.38 (t, *J* = 7.7 Hz, 1H), 7.19 (dd, *J* = 2.4, 0.7 Hz, 1H), 7.08 – 7.00 (m, 1H), 6.61 (d, *J* = 7.8 Hz, 1H), 6.22 (t, *J* = 2.1 Hz, 1H), 2.58 (s, 3H). <sup>13</sup>C NMR (151 MHz, CDCl<sub>3</sub>)  $\delta$  158.4, 155.6, 140.4, 138.6, 136.3, 136.0, 131.5, 131.0, 129.3, 128.6, 126.5, 121.7, 120.5, 106.5, 24.6. HRMS (ESI) (m/z) Calculated for C<sub>15</sub>H<sub>14</sub>N<sub>3</sub><sup>+</sup> [M + H]<sup>+</sup>: 236.1182; found: 236.1181.

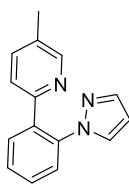

6ba

**2-(2-(1H-pyrazol-1-yl)phenyl)-5-methylpyridine (6ba):** Prepared as shown in general procedure; yellow oil; eluent (petroleum ether/EtOAc = 3:1, v/v); yield is 80% (18.8 mg).  $^1\text{H}$  NMR (400 MHz,  $\text{CDCl}_3$ )  $\delta$  8.46 (dt,  $J = 1.9, 0.9$  Hz, 1H), 7.77 – 7.71 (m, 1H), 7.63 (d,  $J = 1.8$  Hz, 1H), 7.58 – 7.53 (m, 1H), 7.51 – 7.46 (m, 2H), 7.30 – 7.26 (m, 1H), 7.18 (d,  $J = 2.4$  Hz, 1H), 6.64 (dd,  $J = 8.0, 0.8$  Hz, 1H), 6.23 (t,  $J = 2.1$  Hz, 1H), 2.30 (s, 3H).  $^{13}\text{C}$  NMR (151 MHz,  $\text{CDCl}_3$ )  $\delta$  153.4, 150.1, 140.5, 138.6, 136.7, 135.8, 131.8, 131.4, 131.0, 129.2, 128.6, 126.5, 123.0, 106.7, 18.2. HRMS (ESI) (m/z) Calculated for  $\text{C}_{15}\text{H}_{14}\text{N}_3^+$  [M + H] $^+$ : 236.1182; found: 236.1184.

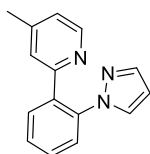

6ca

**2-(2-(1H-pyrazol-1-yl)phenyl)-4-methylpyridine (6ca):** Prepared as shown in general procedure; yellow oil; eluent (petroleum ether/EtOAc = 3:1, v/v); yield is 75% (17.7 mg).  $^1\text{H}$  NMR (400 MHz,  $\text{CDCl}_3$ )  $\delta$  8.47 (dd,  $J = 5.0, 0.9$  Hz, 1H), 7.77 – 7.71 (m, 1H), 7.63 (d,  $J = 1.8$  Hz, 1H), 7.60 – 7.55 (m, 1H), 7.52 – 7.45 (m, 2H), 7.17 (d,  $J = 2.4$  Hz, 1H), 6.97 (ddd,  $J = 5.1, 1.7, 0.8$  Hz, 1H), 6.57 (dt,  $J = 1.7, 0.9$  Hz, 1H), 6.22 (t,  $J = 2.1$  Hz, 1H), 2.15 (s, 3H).  $^{13}\text{C}$  NMR (151 MHz,  $\text{CDCl}_3$ )  $\delta$  156.0, 149.3, 147.3, 140.4, 138.6, 136.0, 131.4, 131.0, 129.3, 128.5, 126.5, 124.4, 123.2, 106.6, 21.0. HRMS (ESI) (m/z) Calculated for  $\text{C}_{15}\text{H}_{14}\text{N}_3^+$  [M + H] $^+$ : 236.1182; found: 236.1183.

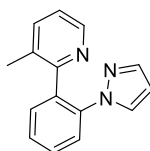

6da

**2-(2-(1H-pyrazol-1-yl)phenyl)-3-methylpyridine (6da):** Prepared as shown in general procedure; yellow oil; eluent (petroleum ether/EtOAc = 3:1, v/v); yield is 80% (18.8 mg).  $^1\text{H}$  NMR (400 MHz,  $\text{CDCl}_3$ )  $\delta$  8.52 (dd,  $J = 4.9, 1.7$  Hz, 1H), 7.73 – 7.67 (m, 1H), 7.58 – 7.50 (m, 2H), 7.48 – 7.41 (m, 2H), 7.39 (ddd,  $J = 7.7, 1.7, 0.8$  Hz, 1H), 7.16 (dd,  $J = 7.7, 4.8$  Hz, 1H), 6.97 (d,  $J = 2.4$  Hz, 1H), 6.11 (t,  $J = 2.1$  Hz, 1H), 1.73 (s, 3H).  $^{13}\text{C}$  NMR (151 MHz,  $\text{CDCl}_3$ )  $\delta$  156.8, 147.1, 140.5, 138.8, 137.7, 134.1, 132.7, 130.8, 130.6, 129.4, 127.7, 124.8, 122.7, 106.5, 18.3. HRMS (ESI) (m/z) Calculated for  $\text{C}_{15}\text{H}_{14}\text{N}_3^+$  [M + H] $^+$ : 236.1182; found: 236.1183.

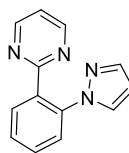

6ea

**2-(2-(1H-pyrazol-1-yl)phenyl)pyrimidine (6ea):** Prepared as shown in general procedure; yellow oil; eluent (petroleum ether/EtOAc = 3:1, v/v); yield is 88% (19.6 mg).  $^1\text{H}$  NMR (400 MHz,  $\text{CDCl}_3$ )  $\delta$  8.66 (d,  $J = 4.9$  Hz, 2H), 7.91 – 7.83 (m, 1H), 7.61 – 7.53 (m, 2H), 7.51 (q,  $J = 4.4, 3.8$  Hz, 2H), 7.46 (d,  $J = 2.4$  Hz, 1H), 7.13 (t,  $J = 4.9$  Hz, 1H), 6.29 (t,  $J = 2.1$  Hz, 1H).  $^{13}\text{C}$  NMR (151 MHz,  $\text{CDCl}_3$ )  $\delta$  165.8, 157.1, 140.4, 139.3, 134.5, 131.4, 130.4, 130.3, 128.1, 125.8, 119.0, 106.6. HRMS (ESI) (m/z) Calculated for  $\text{C}_{13}\text{H}_{11}\text{N}_4^+$  [M + H] $^+$ : 223.0978; found: 223.0978.

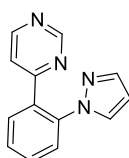

6fa

**4-(2-(1H-pyrazol-1-yl)phenyl)pyrimidine (6fa):** Prepared as shown in general procedure; yellow oil; eluent (petroleum ether/EtOAc = 3:1, v/v); yield is 81% (18.1 mg).  $^1\text{H}$  NMR (400 MHz,  $\text{CDCl}_3$ )  $\delta$  9.22 (s, 1H), 8.50 (d,  $J = 5.2$  Hz, 1H), 7.88 – 7.82 (m, 1H), 7.64 (d,  $J = 1.9$  Hz, 1H), 7.60 (s, 1H), 7.59 – 7.54 (m, 2H), 7.37 (d,  $J = 2.4$  Hz, 1H), 6.66 (dd,  $J = 5.3, 1.4$  Hz, 1H), 6.35 (t,  $J = 2.1$  Hz, 1H).  $^{13}\text{C}$  NMR (151 MHz,  $\text{CDCl}_3$ )  $\delta$  163.7, 158.9, 156.5, 141.0, 138.8, 133.5, 131.1, 131.1, 131.0, 129.1, 126.8, 120.4, 107.5. HRMS (ESI) (m/z) Calculated for  $\text{C}_{13}\text{H}_{11}\text{N}_4^+$  [M + H] $^+$ : 223.0978; found: 223.0976.

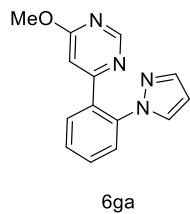

**4-(2-(1H-pyrazol-1-yl)phenyl)-6-methoxypyrimidine (6ga):** Prepared as shown in general procedure; yellow oil; eluent (petroleum ether/EtOAc = 3:1, v/v); yield is 61% (15.4 mg). <sup>1</sup>H NMR (400 MHz, CDCl<sub>3</sub>) δ 8.77 (d, *J* = 1.2 Hz, 1H), 7.81 (dt, *J* = 6.4, 1.6 Hz, 1H), 7.66 (d, *J* = 1.7 Hz, 1H), 7.58 – 7.50 (m, 3H), 7.38 – 7.35 (m, 1H), 6.34 (t, *J* = 2.1 Hz, 1H), 6.16 (d, *J* = 1.2 Hz, 1H), 3.91 (s, 3H). <sup>13</sup>C NMR (151 MHz, CDCl<sub>3</sub>) δ 169.8, 163.8, 158.3, 140.9, 138.8, 133.8, 131.1, 130.8, 130.5, 128.8, 126.8, 107.2, 106.9, 53.9. HRMS (ESI) (*m/z*) Calculated for C<sub>14</sub>H<sub>13</sub>N<sub>4</sub>O<sup>+</sup> [*M* + *H*]<sup>+</sup>: 253.1084; found: 253.1084.

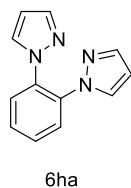

**1,2-di(1H-pyrazol-1-yl)benzene (6ha):** Prepared as shown in general procedure; yellow oil; eluent (petroleum ether/EtOAc = 3:1, v/v); yield is 73% (15.4 mg). <sup>1</sup>H NMR (400 MHz, CDCl<sub>3</sub>) δ 7.71 (s, 2H), 7.70 – 7.67 (m, 2H), 7.51 (dd, *J* = 6.0, 3.5 Hz, 2H), 7.01 (d, *J* = 2.5 Hz, 2H), 6.30 (t, *J* = 2.1 Hz, 2H). <sup>13</sup>C NMR (151 MHz, CDCl<sub>3</sub>) δ 141.2, 134.6, 130.5, 128.9, 127.0, 107.5. HRMS (ESI) (*m/z*) Calculated for C<sub>12</sub>H<sub>11</sub>N<sub>4</sub><sup>+</sup> [*M* + *H*]<sup>+</sup>: 211.0978; found: 211.0978.

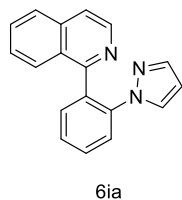

**1-(2-(1H-pyrazol-1-yl)phenyl)isoquinoline (6ia):** Prepared as shown in general procedure; yellow oil; eluent (petroleum ether/EtOAc = 3:1, v/v); yield is 42% (15.4 mg). <sup>1</sup>H NMR (400 MHz, CDCl<sub>3</sub>) δ 8.60 (d, *J* = 5.7 Hz, 1H), 7.82 – 7.73 (m, 2H), 7.67 – 7.59 (m, 3H), 7.59 – 7.50 (m, 3H), 7.38 – 7.30 (m, 2H), 6.93 (d, *J* = 2.5 Hz, 1H), 5.87 (t, *J* = 2.1 Hz, 1H). <sup>13</sup>C NMR (101 MHz, CDCl<sub>3</sub>) δ 158.7, 142.3, 140.4, 139.4, 135.9, 133.2, 131.4, 130.7, 130.3, 129.9, 127.9, 127.5, 127.1, 126.6, 126.4, 125.1, 120.6, 106.5. HRMS (ESI) (*m/z*) Calculated for C<sub>18</sub>H<sub>14</sub>N<sub>3</sub><sup>+</sup> [*M* + *H*]<sup>+</sup>: 272.1182; found: 272.1182.

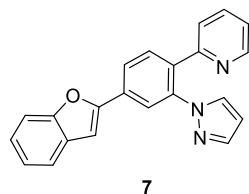

**2-(4-(benzofuran-2-yl)-2-(1H-pyrazol-1-yl)phenyl)pyridine (7):** Prepared as shown in general procedure; white solid; eluent (petroleum ether/EtOAc = 3:1, v/v); yield is 90%. <sup>1</sup>H NMR (400 MHz, CDCl<sub>3</sub>) δ 8.68 (ddd, *J* = 5.0, 1.8, 1.0 Hz, 1H), 8.10 (d, *J* = 1.8 Hz, 1H), 8.01 (dd, *J* = 8.2, 1.8 Hz, 1H), 7.89 (d, *J* = 8.2 Hz, 1H), 7.71 (d, *J* = 1.9 Hz, 1H), 7.63 – 7.58 (m, 1H), 7.55 – 7.47 (m, 2H), 7.31 (ddd, *J* = 8.3, 7.2, 1.4 Hz, 1H), 7.25 (dd, *J* = 6.1, 1.6 Hz, 2H), 7.19 (ddd, *J* = 7.6, 4.9, 1.1 Hz, 1H), 7.16 (d, *J* = 0.9 Hz, 1H), 6.77 (dt, *J* = 8.0, 1.1 Hz, 1H), 6.30 (t, *J* = 2.1 Hz, 1H). <sup>13</sup>C NMR (101 MHz, CDCl<sub>3</sub>) δ 155.7, 155.1, 154.3, 149.9, 140.9, 139.1, 136.2, 135.4, 131.8, 131.7, 131.5, 129.0, 124.9, 124.7, 123.6, 123.2, 123.0, 122.4, 121.3, 111.3, 107.0, 103.0. HRMS (ESI) (*m/z*) Calculated for C<sub>22</sub>H<sub>16</sub>N<sub>3</sub>O<sup>+</sup> [*M* + *H*]<sup>+</sup>: 338.1288; found: 338.1288.

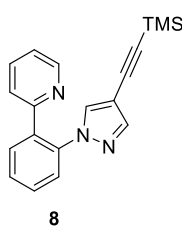

**2-(2-(4-((trimethylsilyl)ethynyl)-1H-pyrazol-1-yl)phenyl)pyridine (8):** Prepared as shown in general procedure; yellow solid; eluent (petroleum ether/EtOAc = 3:1, v/v); yield is 77%. <sup>1</sup>H NMR (400 MHz, CDCl<sub>3</sub>) δ 8.65 (ddd, *J* = 4.9, 1.9, 1.0 Hz, 1H), 7.80 – 7.73 (m, 1H), 7.70 (d, *J* = 0.7 Hz, 1H), 7.58 – 7.52 (m, 2H), 7.52 – 7.48 (m, 2H), 7.42 (d, *J* = 0.7 Hz, 1H), 7.20 (ddd, *J* = 7.6, 4.9, 1.2 Hz, 1H), 6.86 (dt, *J* = 8.0, 1.1 Hz, 1H), 0.20 (s, 9H). <sup>13</sup>C NMR (101 MHz, CDCl<sub>3</sub>) δ 156.0, 149.9, 143.5, 137.9, 136.4, 136.1, 134.2, 131.3, 129.5, 129.1, 126.6, 123.5, 122.4,



104.6, 95.9, 95.8, 0.0. HRMS (ESI) (m/z) Calculated for C<sub>19</sub>H<sub>20</sub>N<sub>3</sub>Si<sup>+</sup> [M + H]<sup>+</sup>: 318.1421; found: 318.1422.

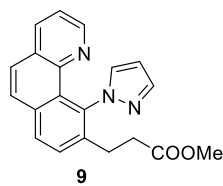

**methyl 3-(10-(1H-pyrazol-1-yl)benzo[h]quinolin-9-yl)propanoate**

**(9)**: Prepared as shown in general procedure; yellow solid; eluent (petroleum ether/EtOAc = 3:1, v/v); yield is 66%. <sup>1</sup>H NMR (400 MHz, CDCl<sub>3</sub>) δ 8.51 (dd, *J* = 4.3, 1.9 Hz, 1H), 8.05 (dd, *J* = 8.1, 1.9 Hz, 1H), 7.99 (d, *J* = 8.3 Hz, 1H), 7.84 – 7.78 (m, 2H), 7.67 (t, *J* = 8.8 Hz, 2H), 7.55 (d, *J* = 2.3 Hz, 1H), 7.33 (dd, *J* = 8.0, 4.2 Hz, 1H), 6.55 (t, *J* = 2.1 Hz, 1H), 3.63 (s, 3H), 2.85 (m, 2H), 2.64 (m, 2H). <sup>13</sup>C NMR (101 MHz, CDCl<sub>3</sub>) δ 173.2, 148.5, 145.6, 140.1, 139.5, 136.6, 135.3, 134.1, 131.9, 130.0, 129.2, 128.3, 127.6, 127.4, 126.4, 121.5, 106.1, 51.6, 35.6, 27.1. HRMS (ESI) (m/z) Calculated for C<sub>20</sub>H<sub>18</sub>N<sub>3</sub>O<sub>2</sub><sup>+</sup> [M + H]<sup>+</sup>: 332.1394; found: 332.1394.

## 9. NMR spectra

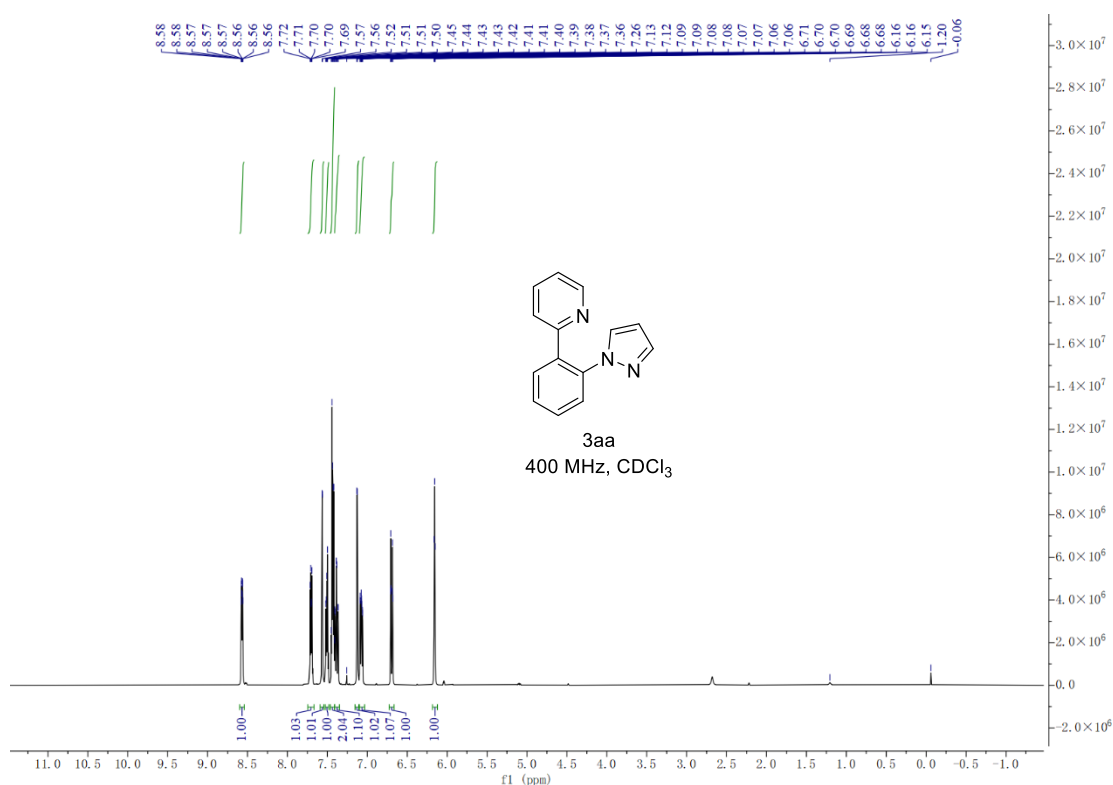

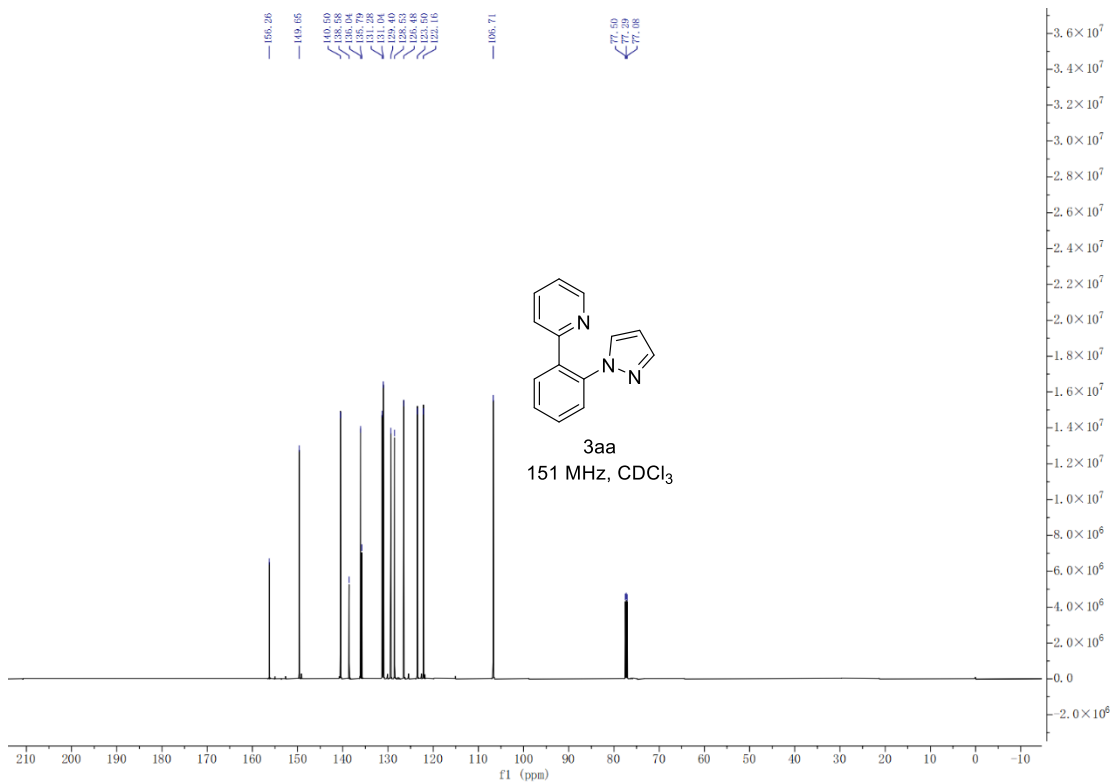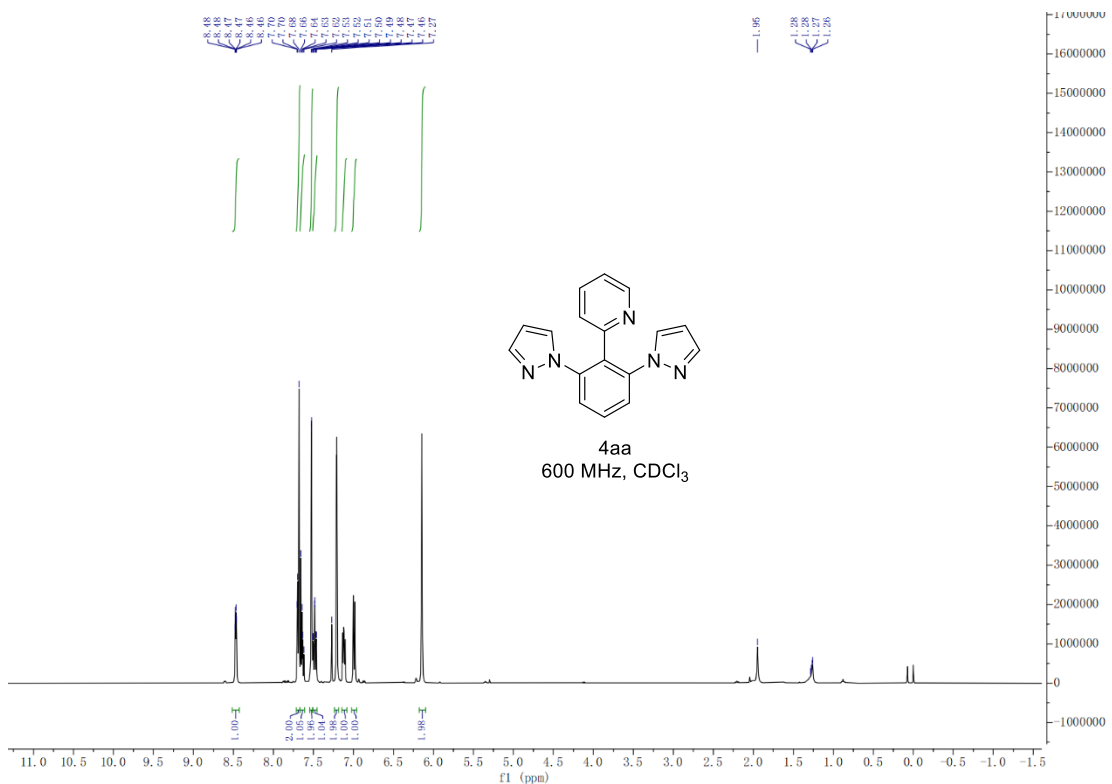

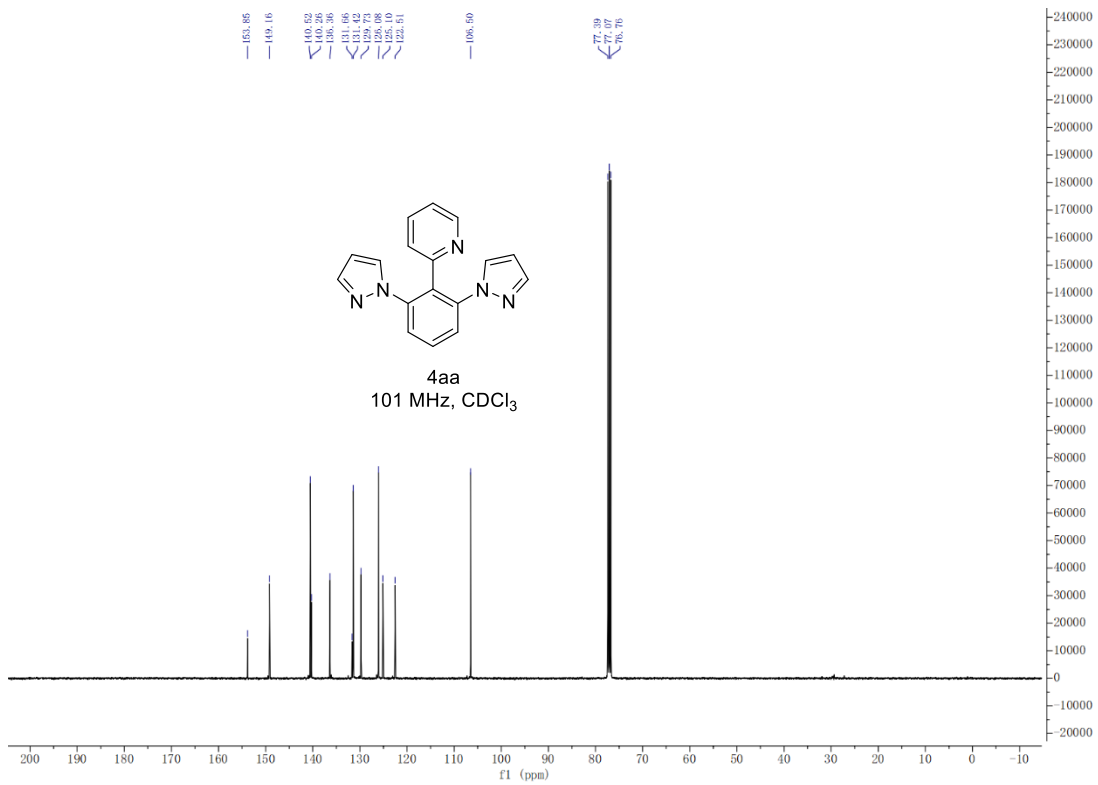



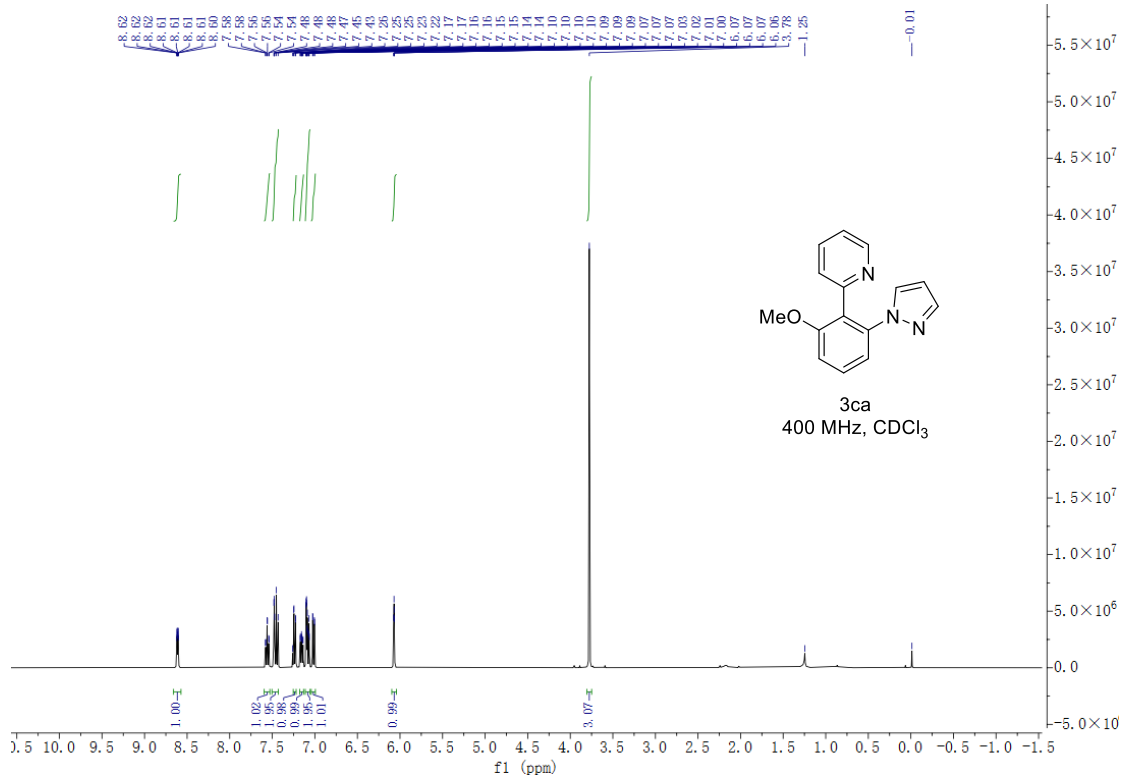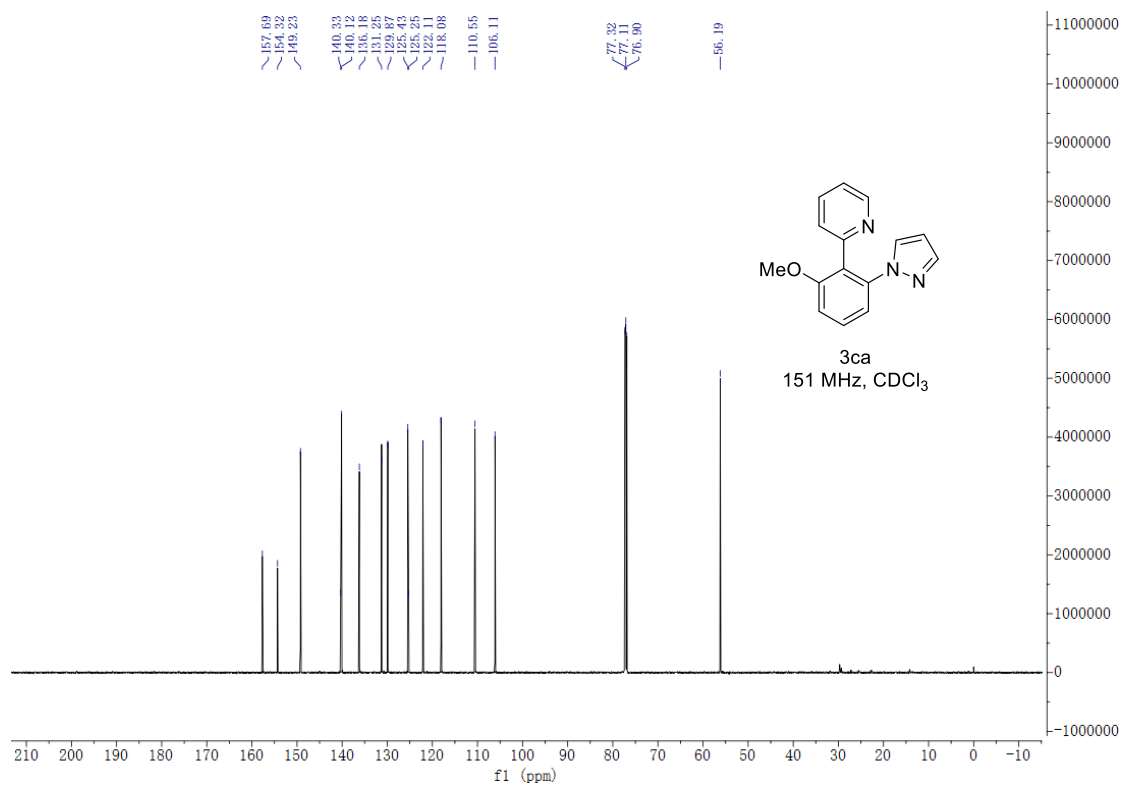

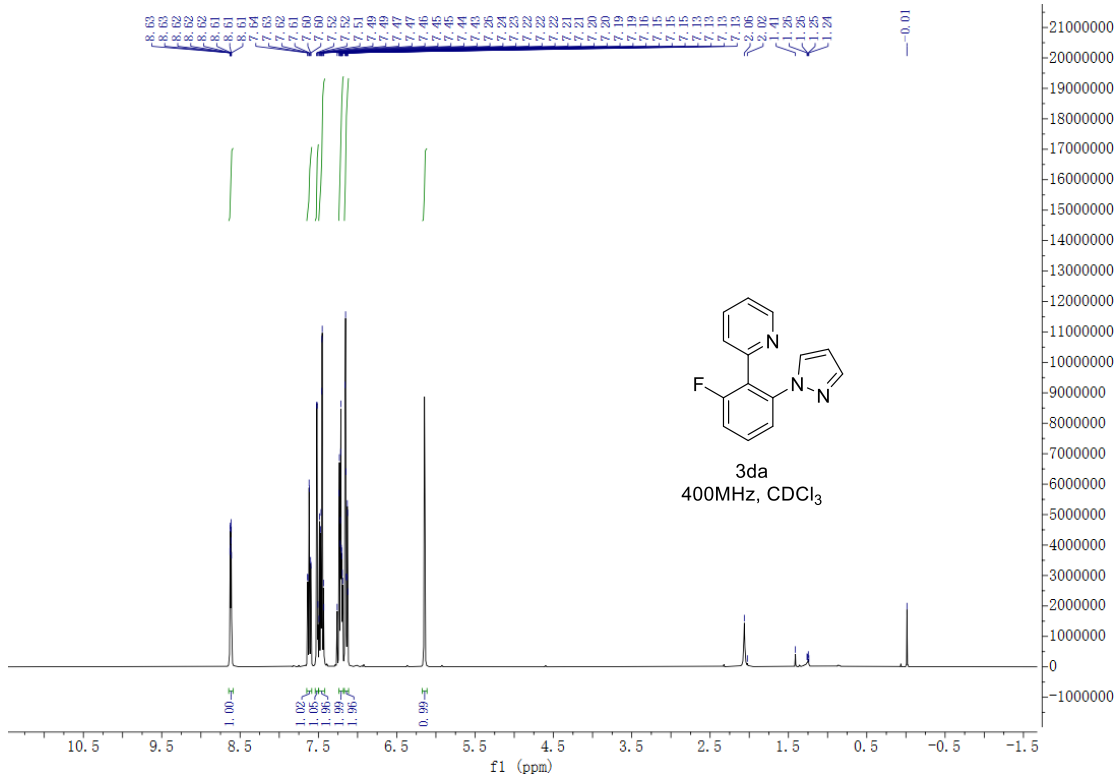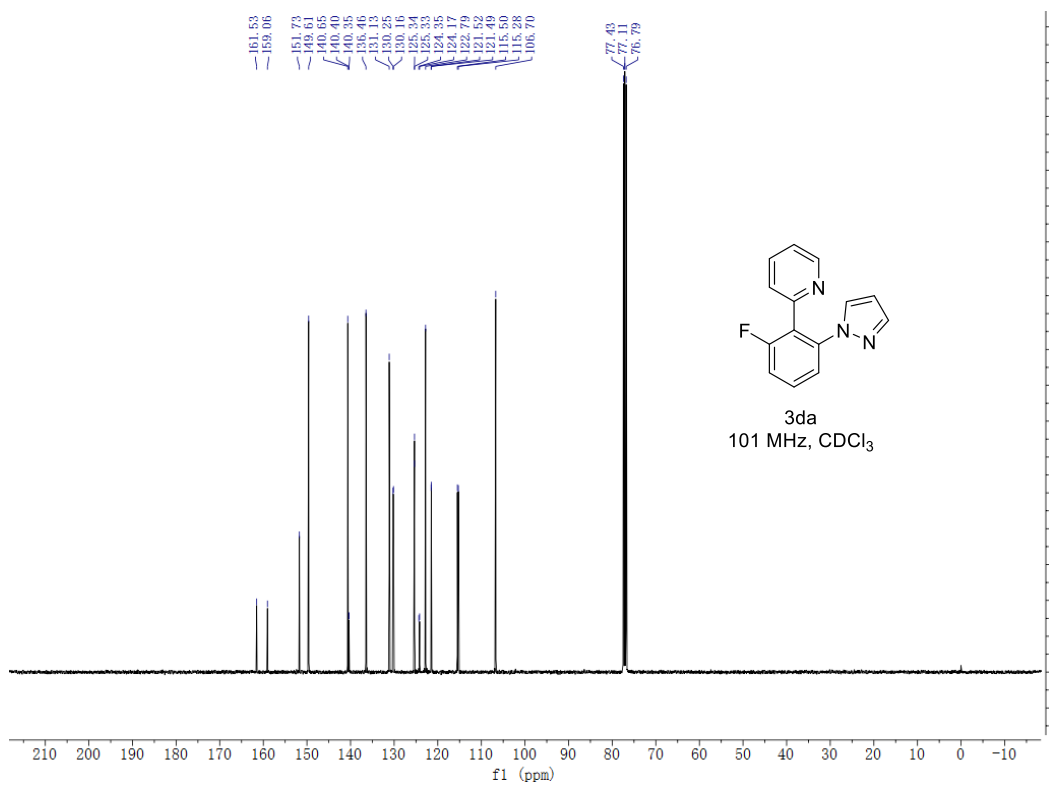

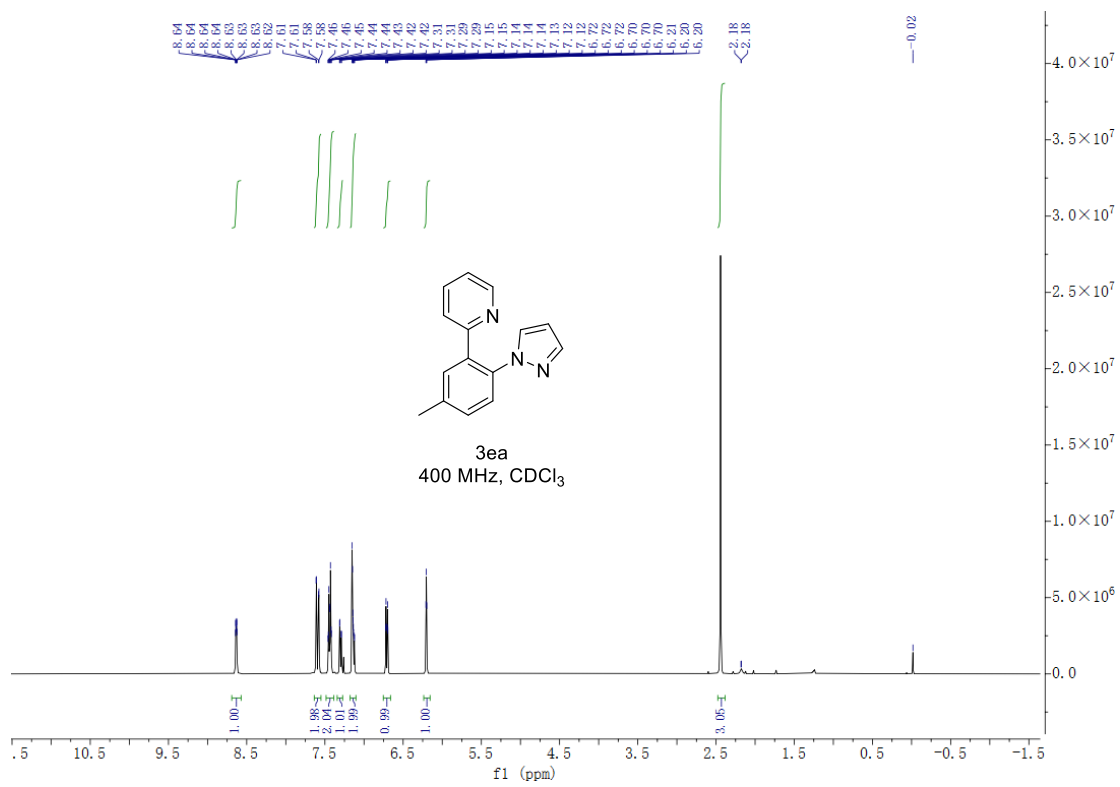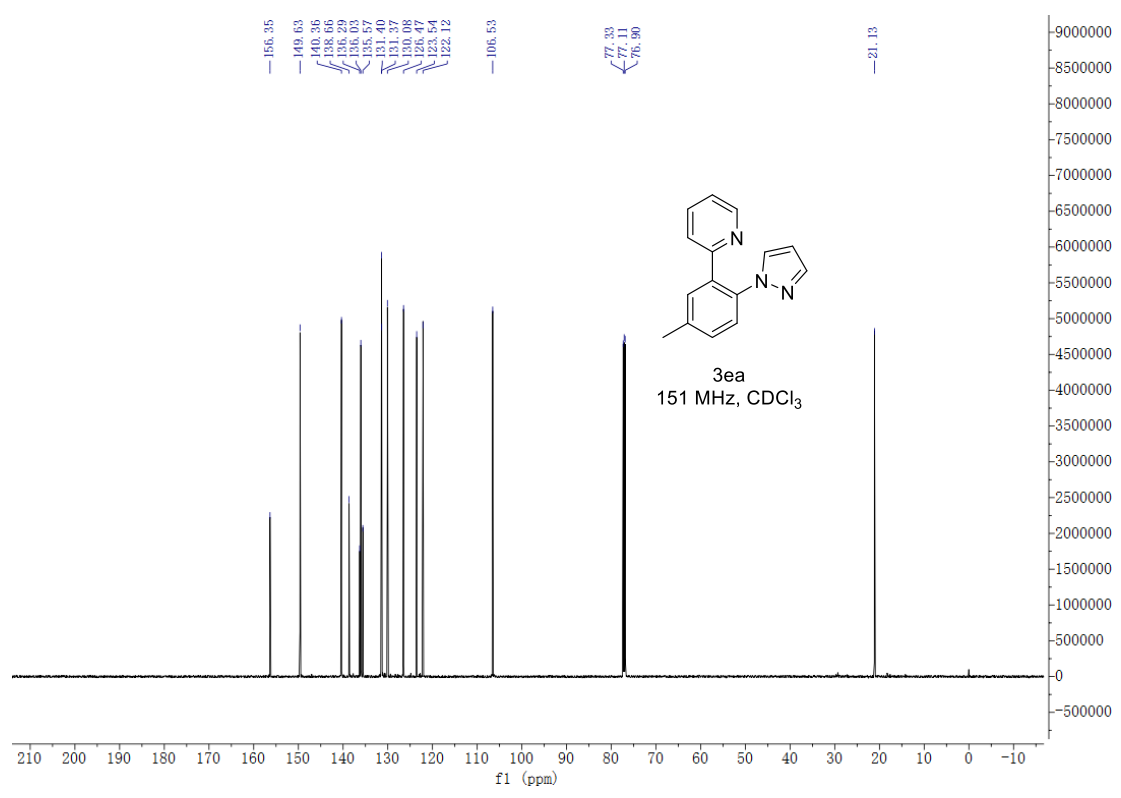





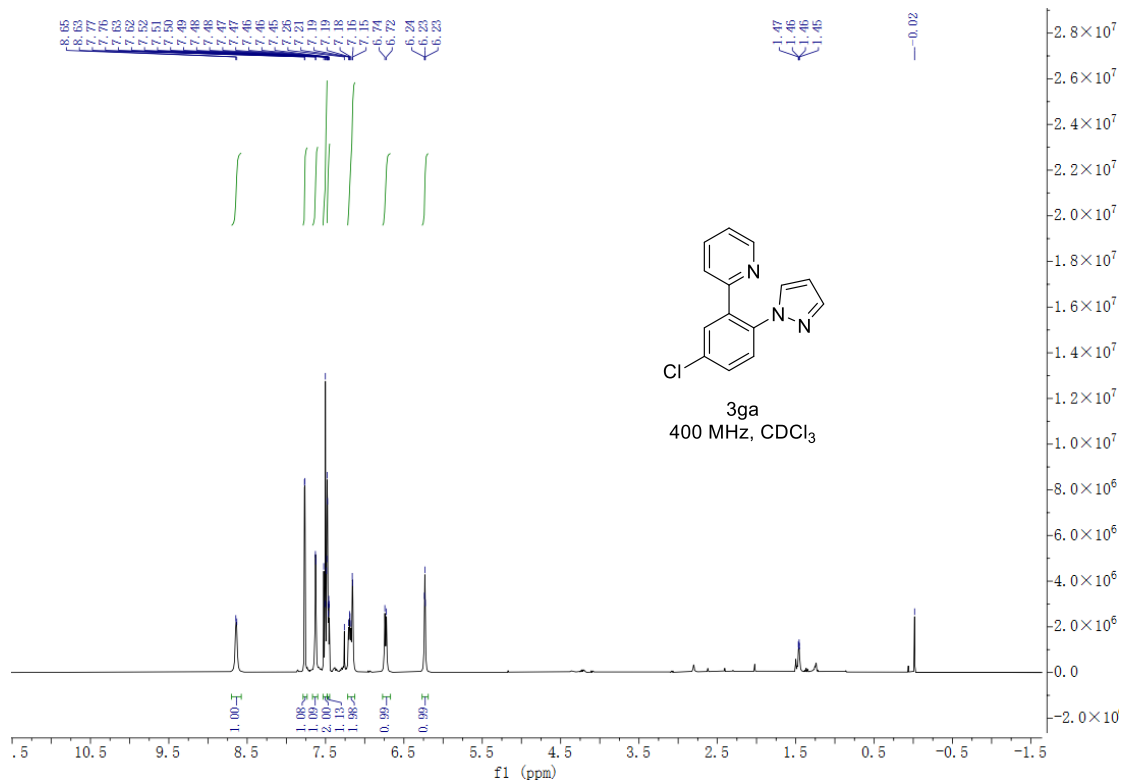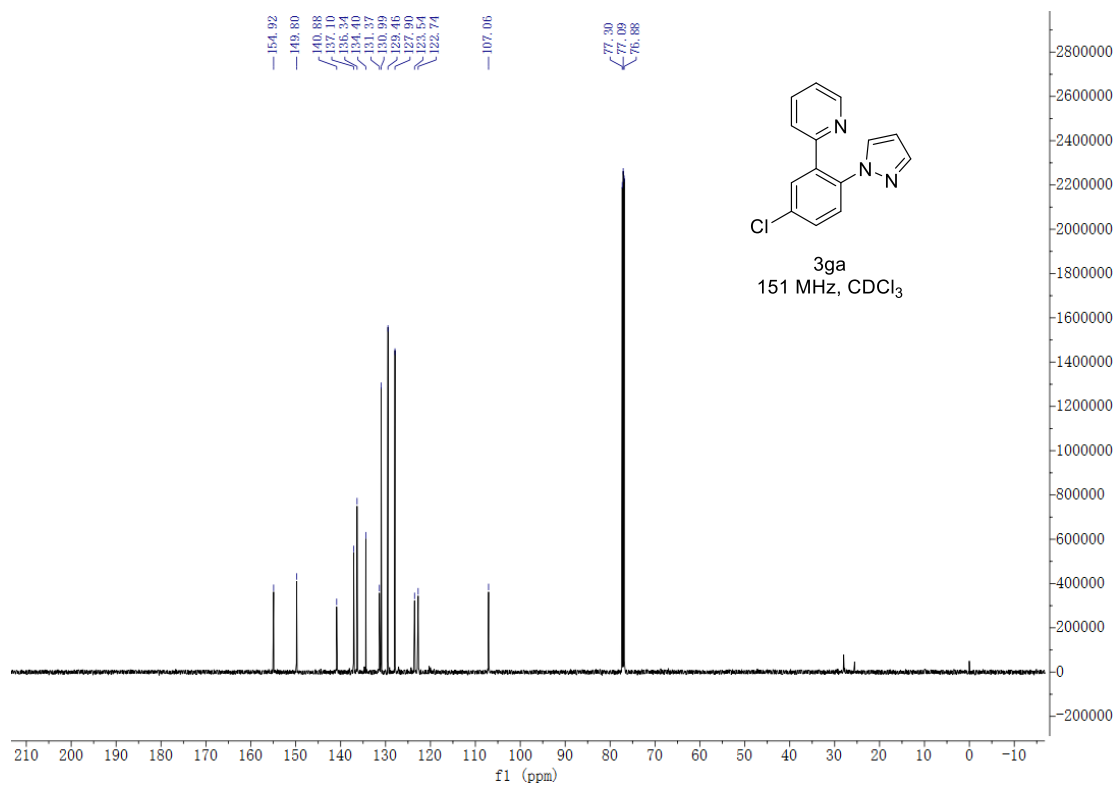

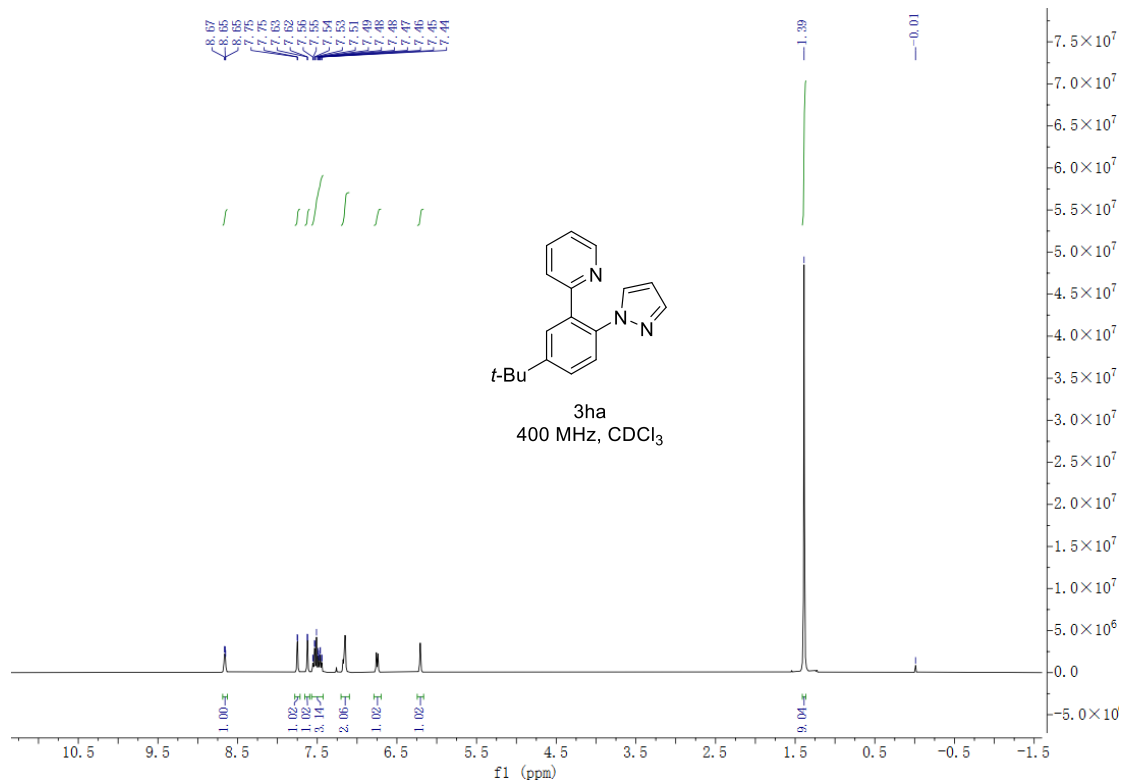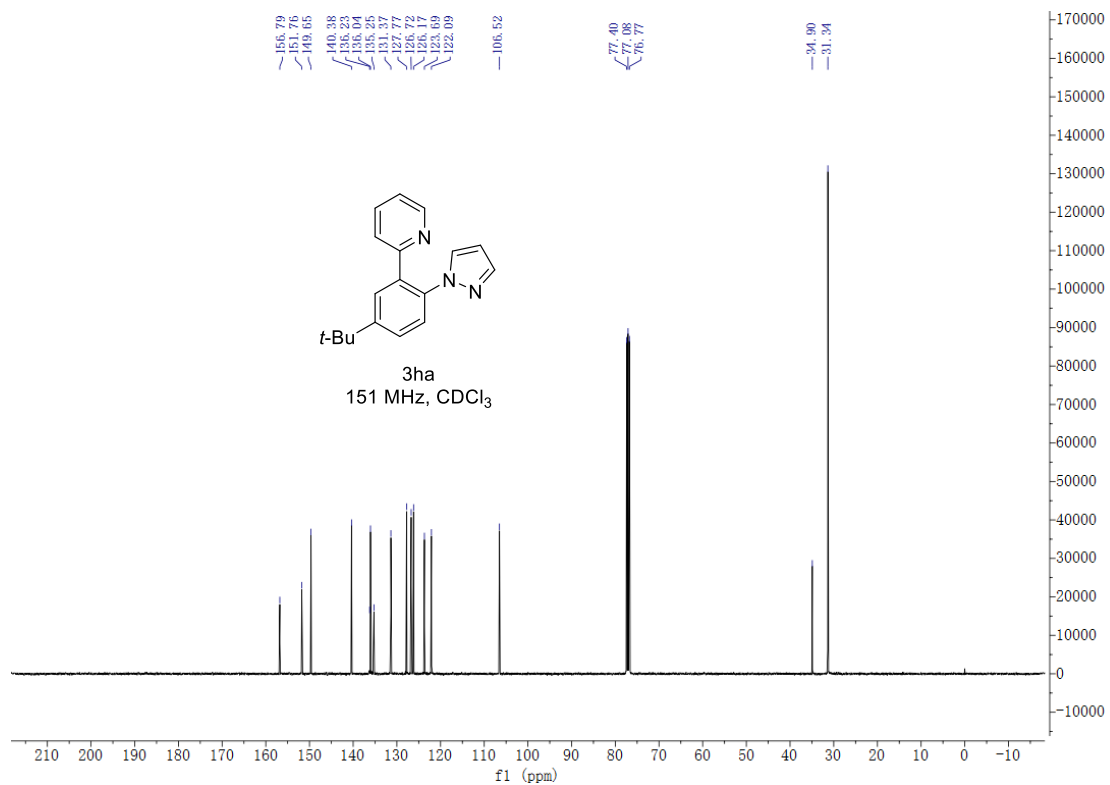



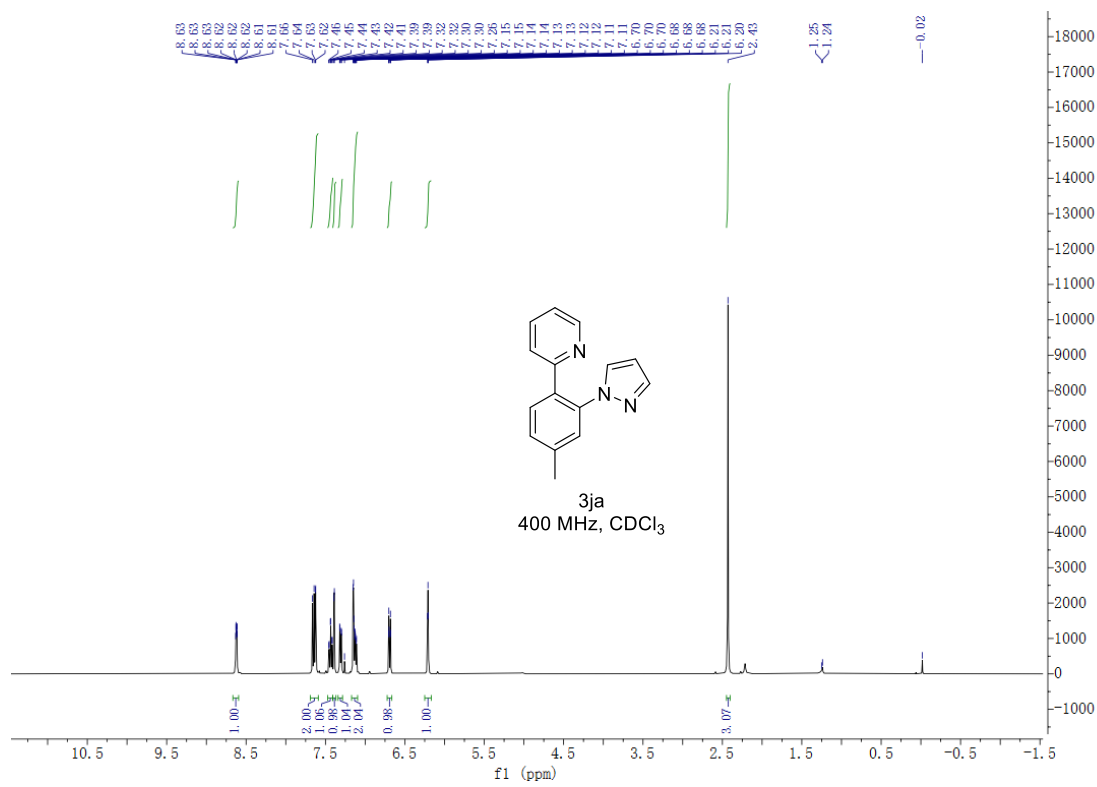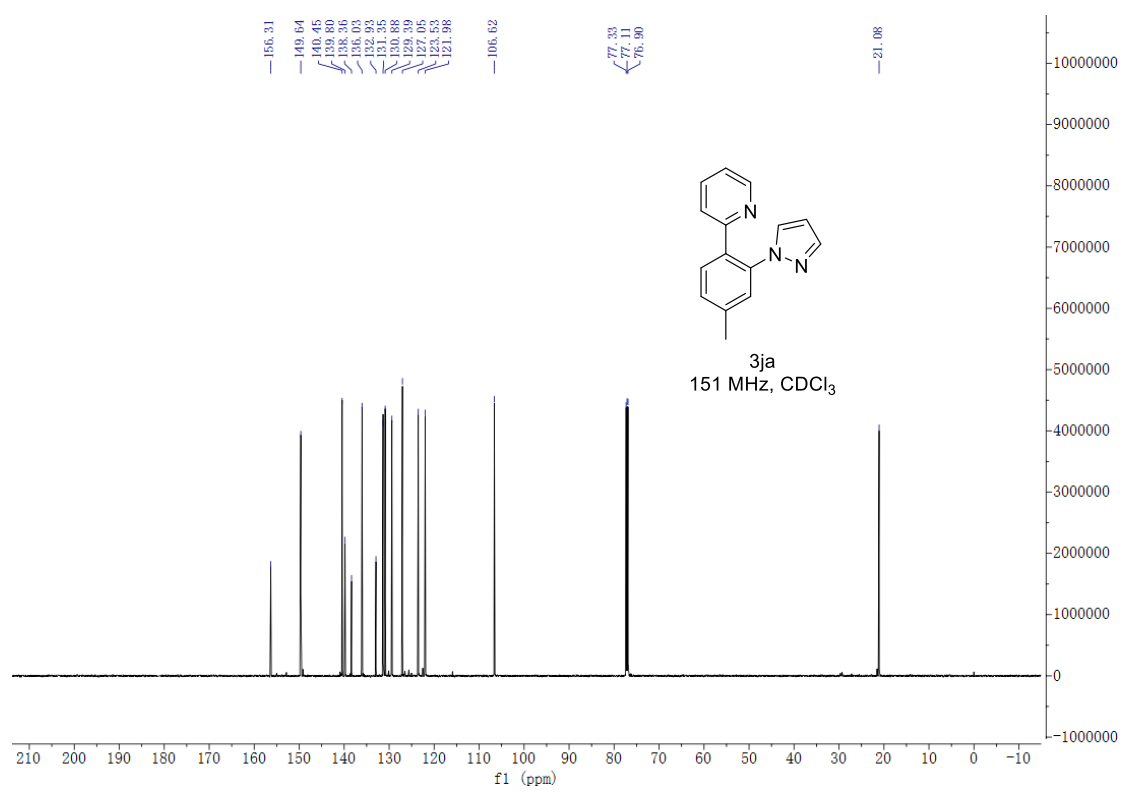



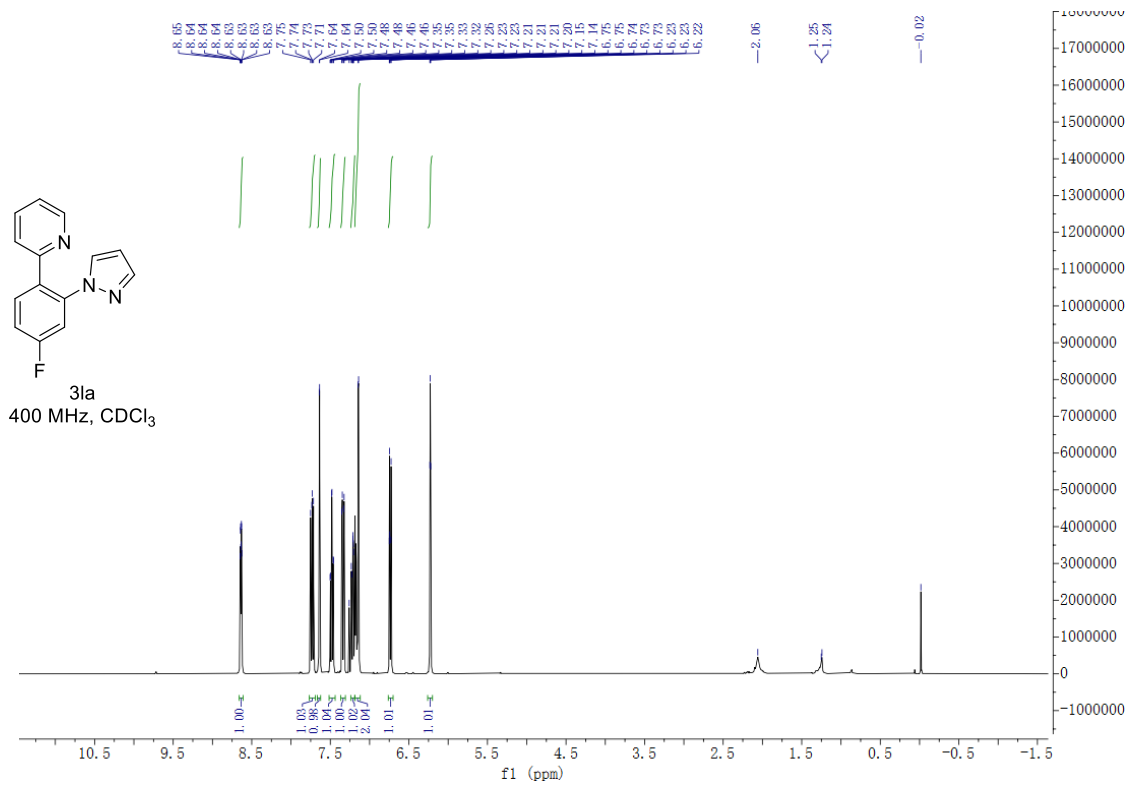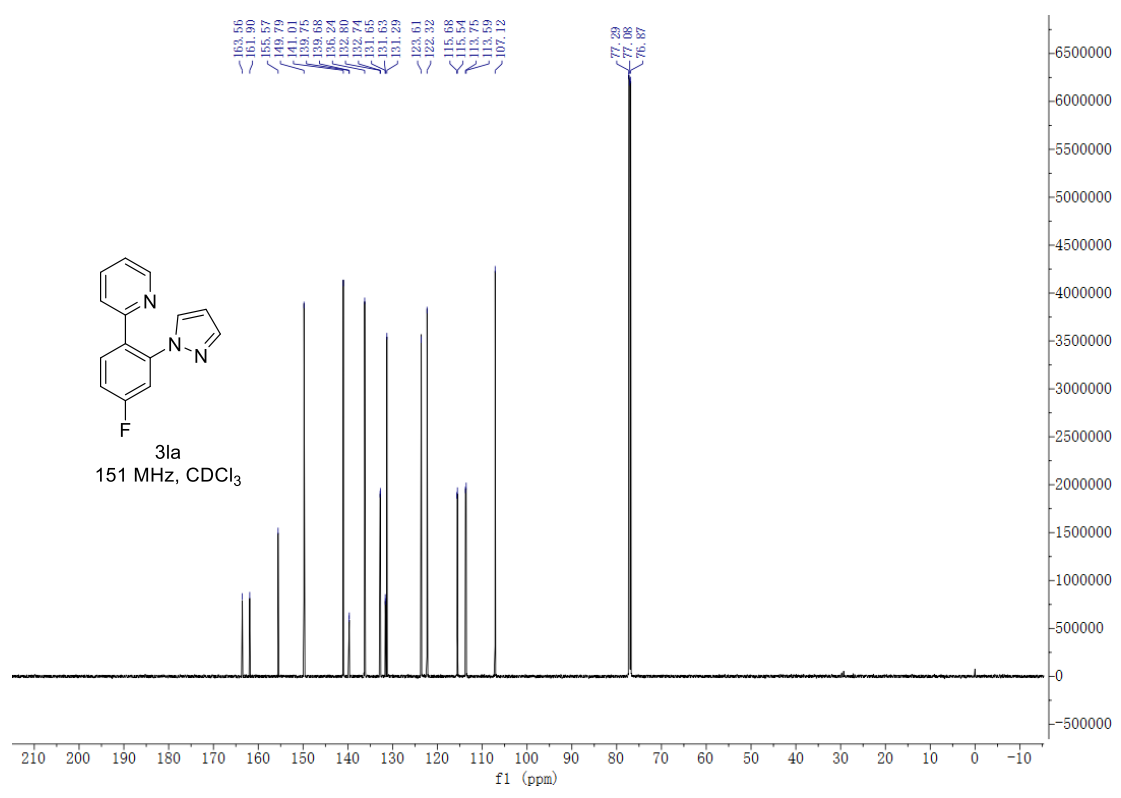

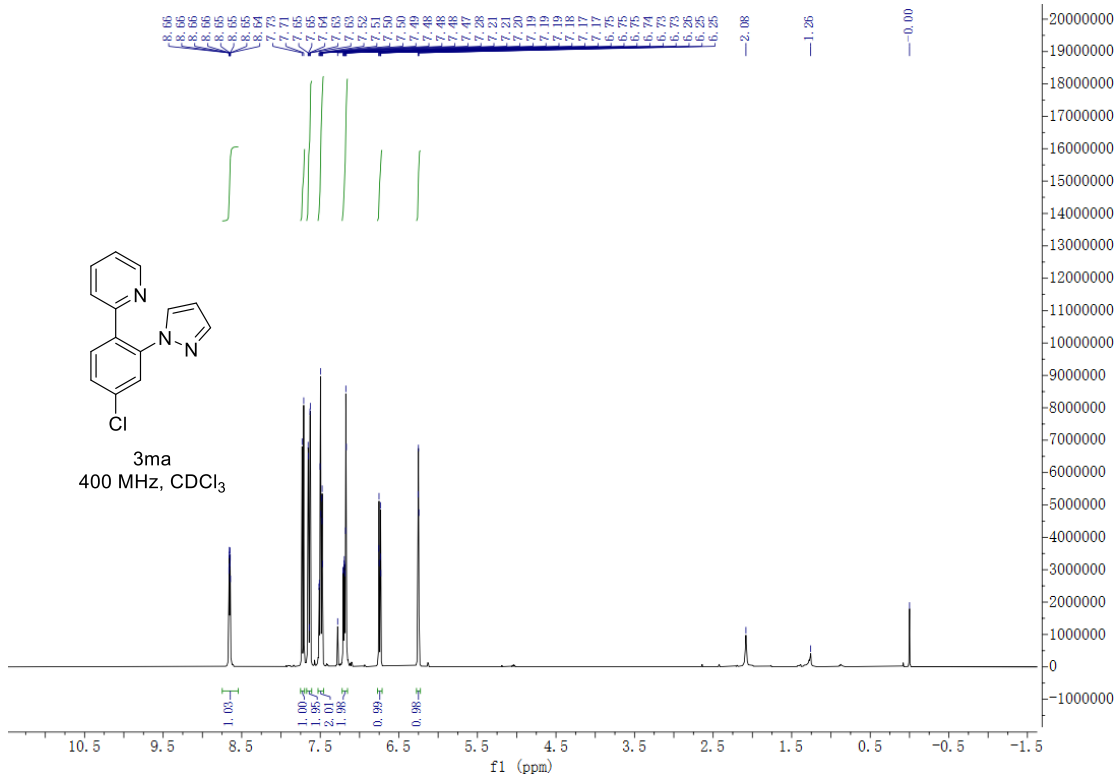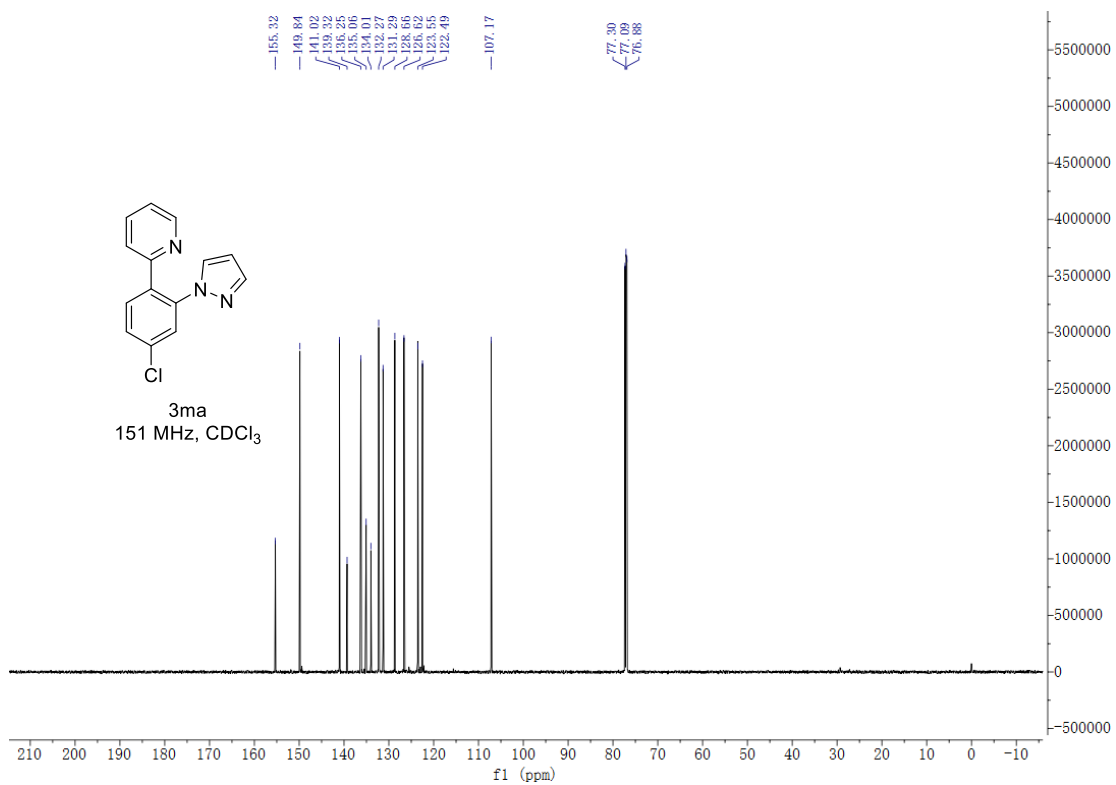

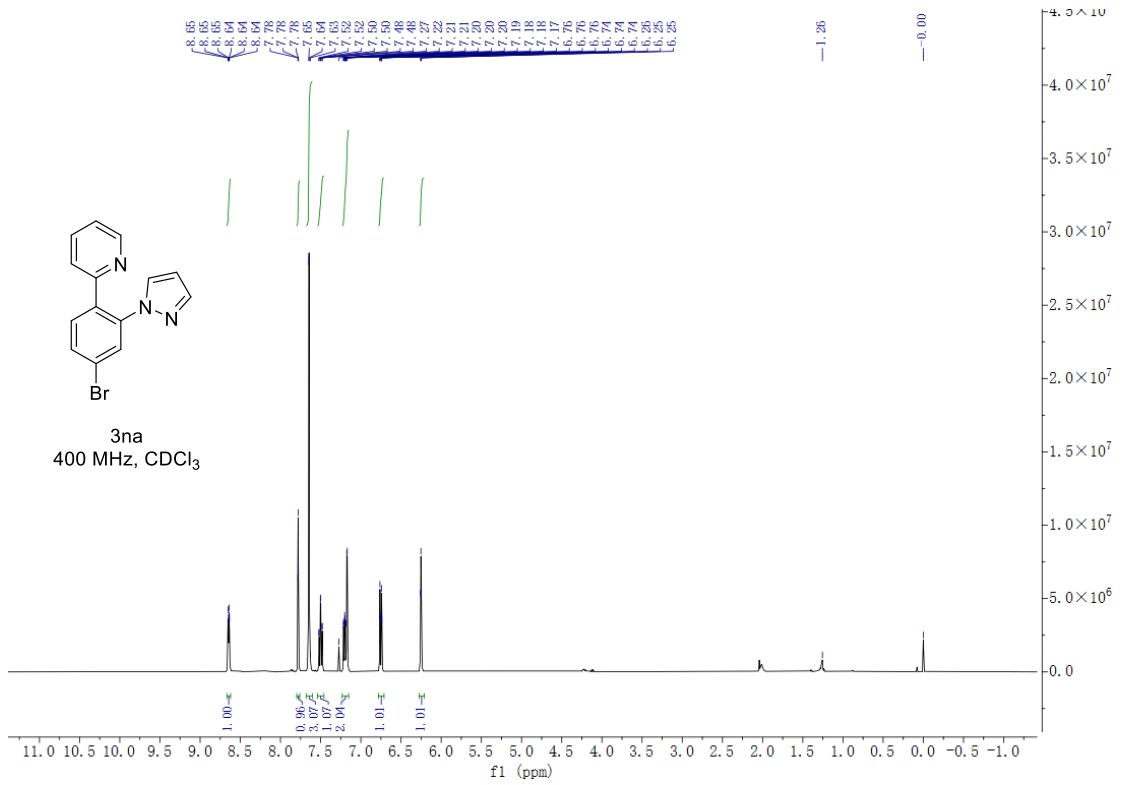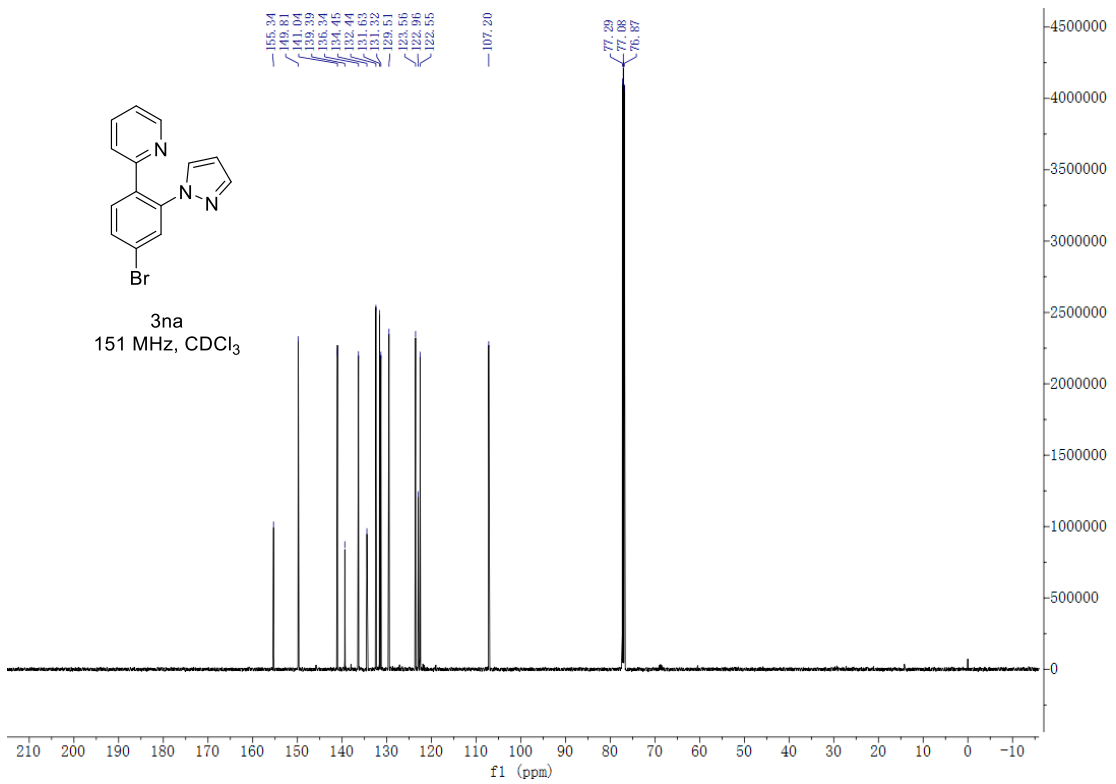



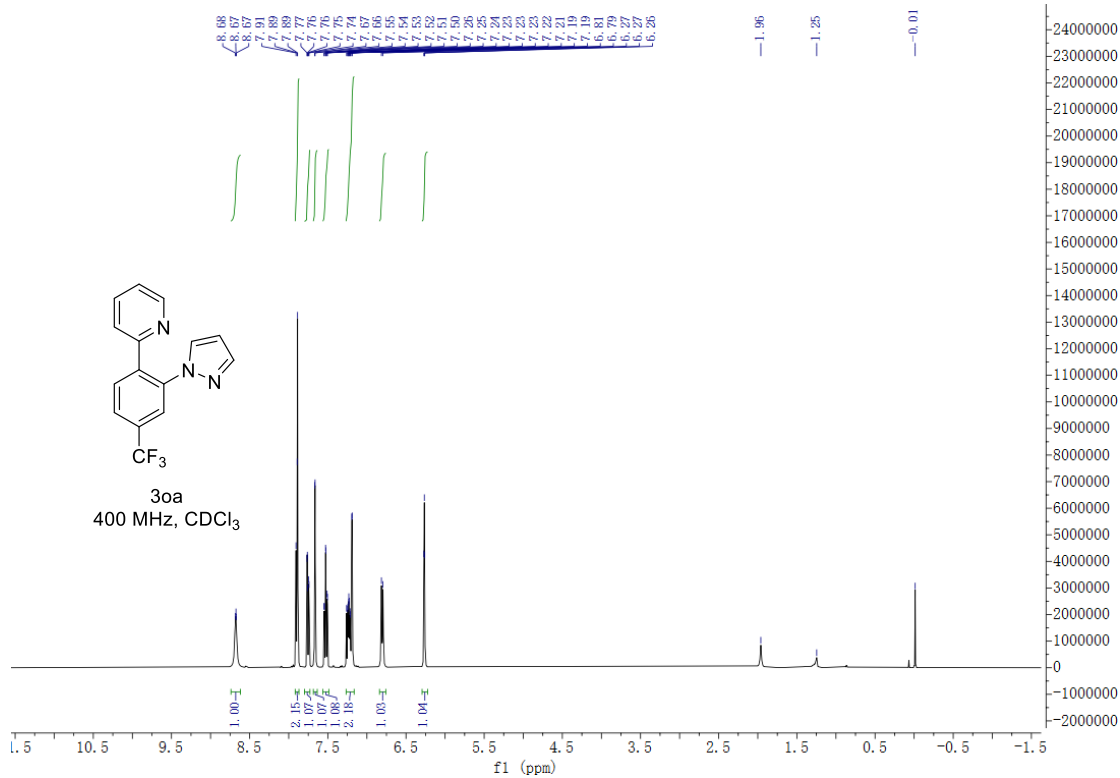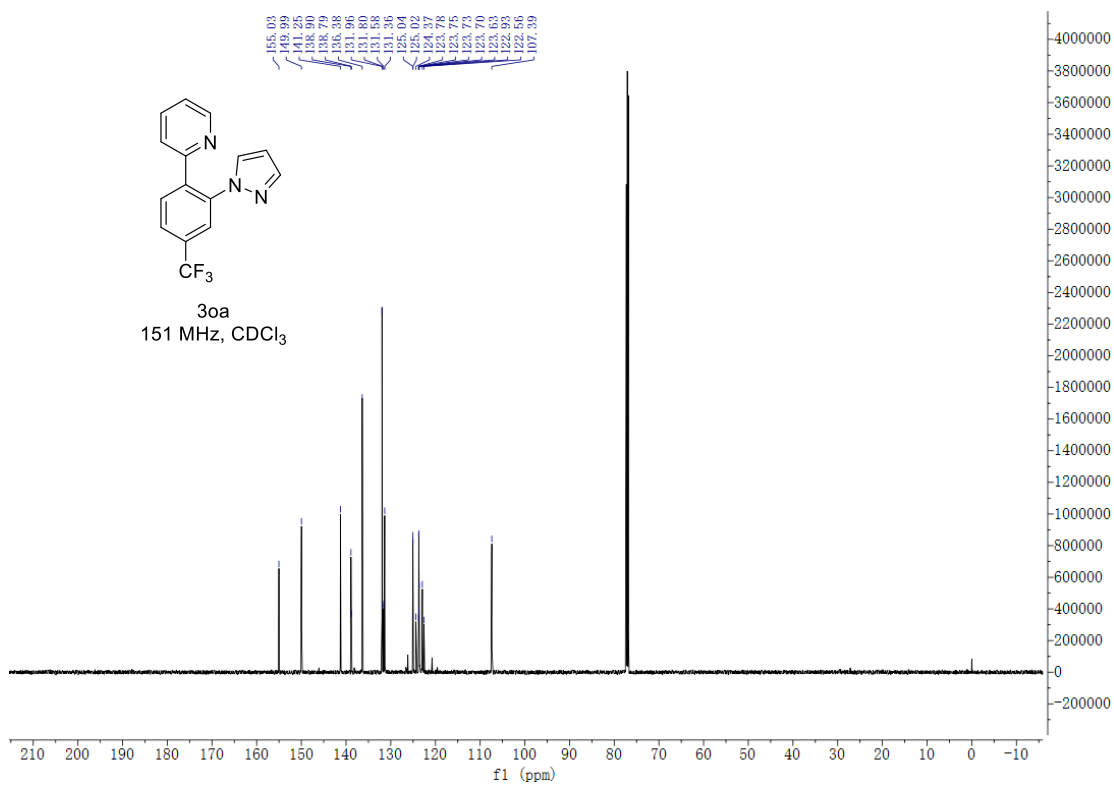

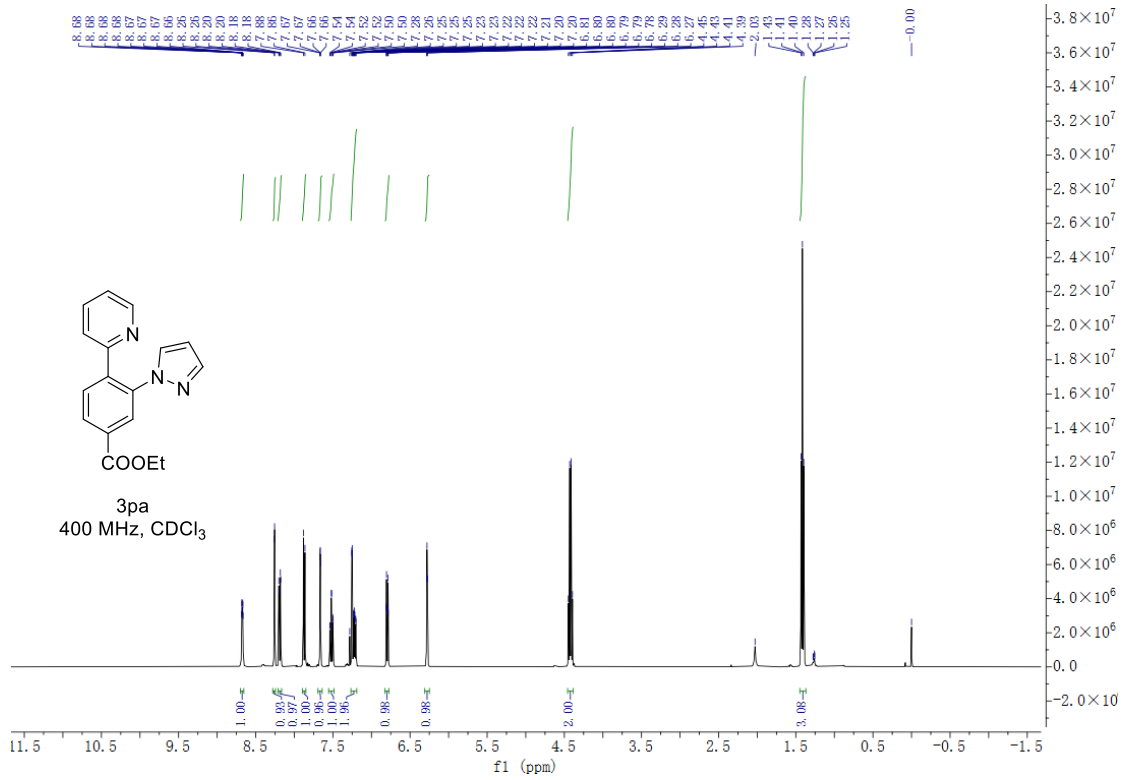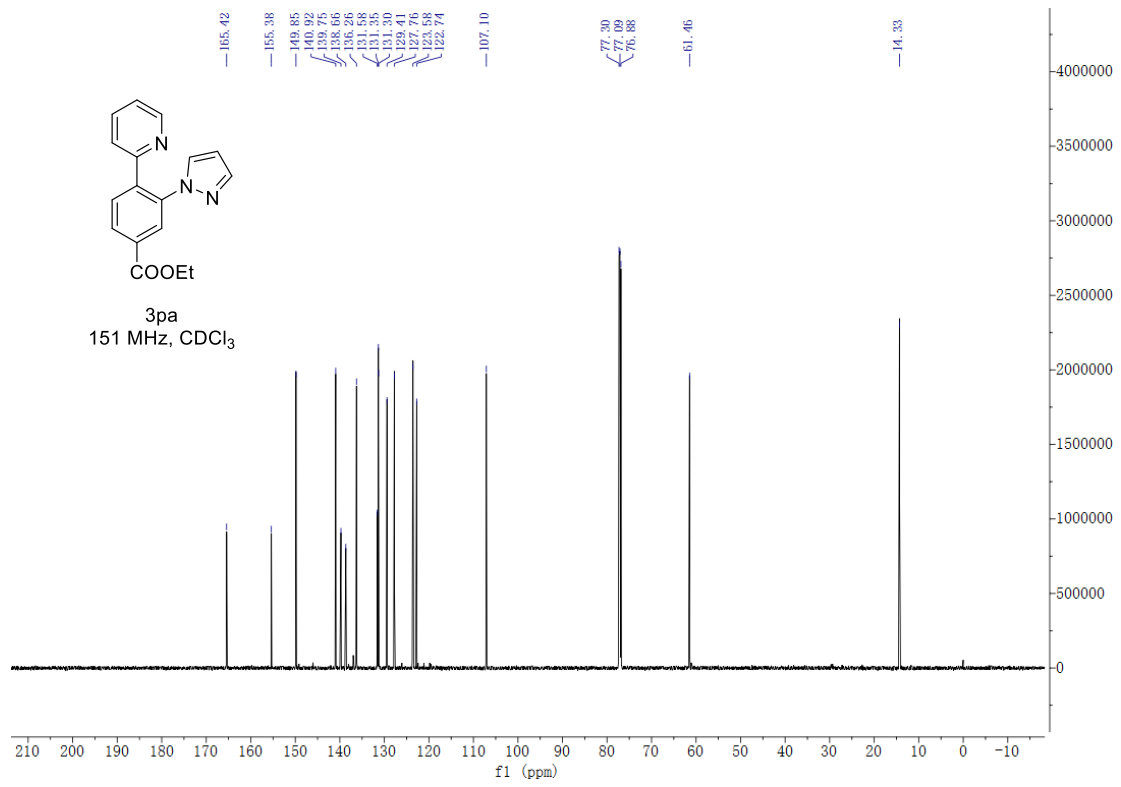

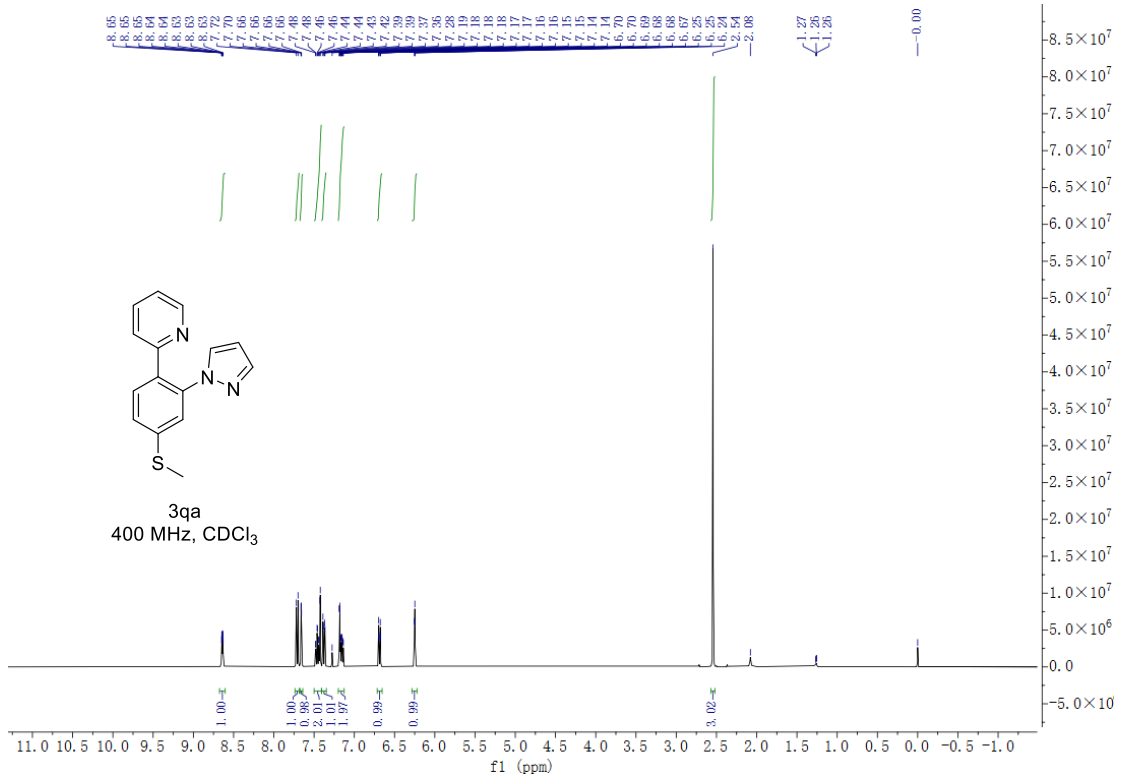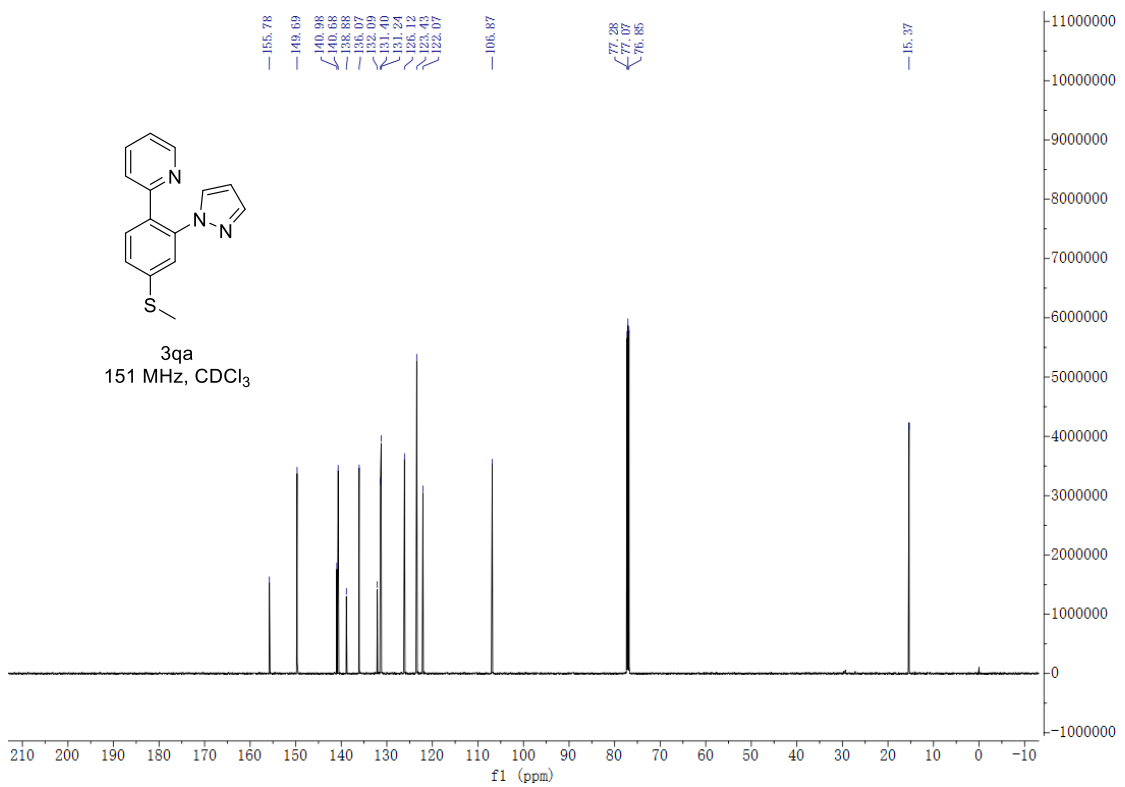









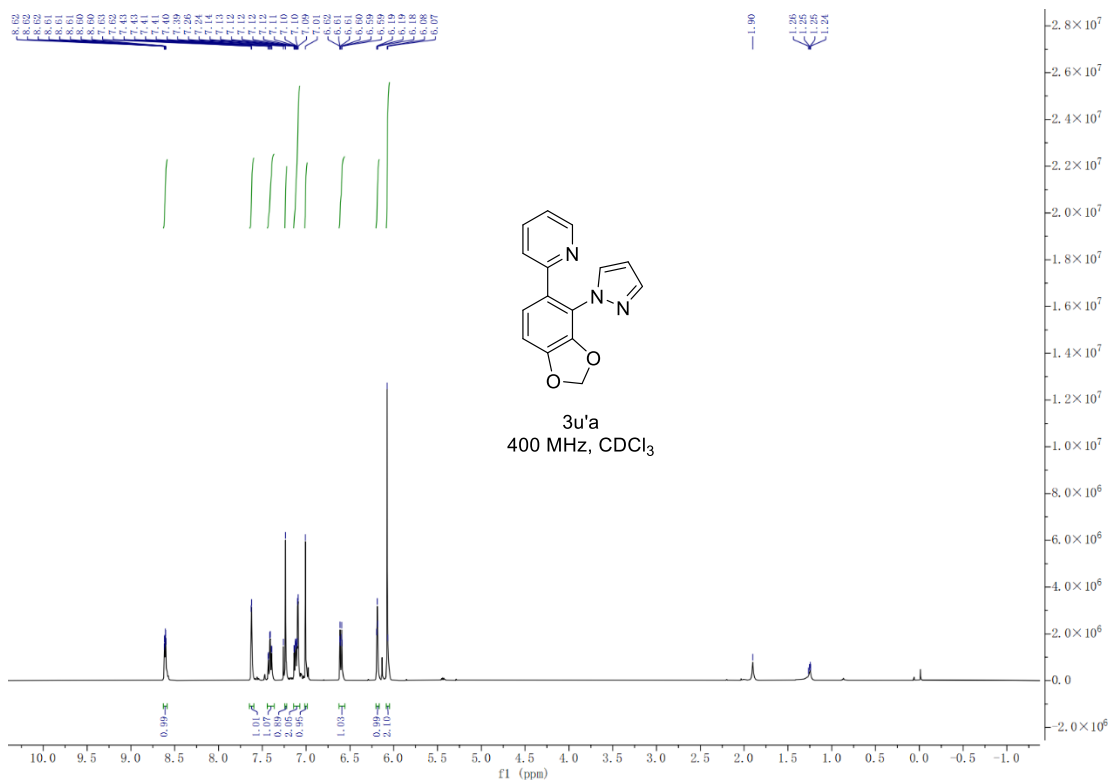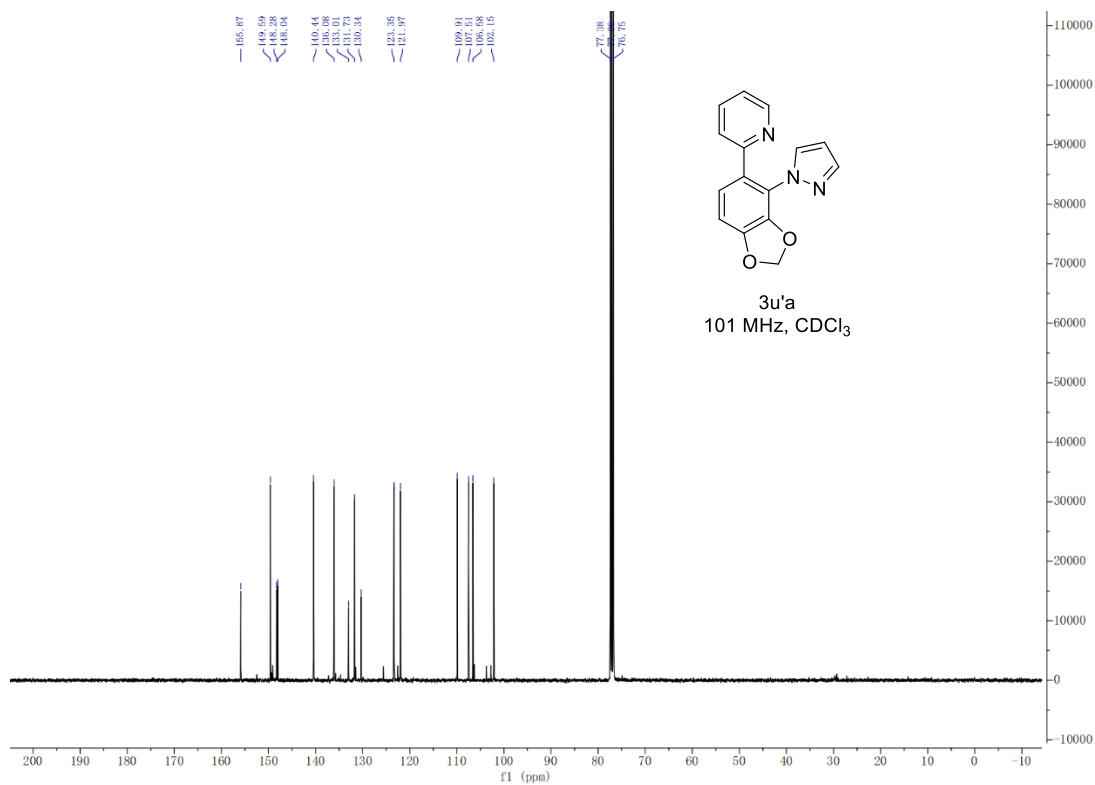









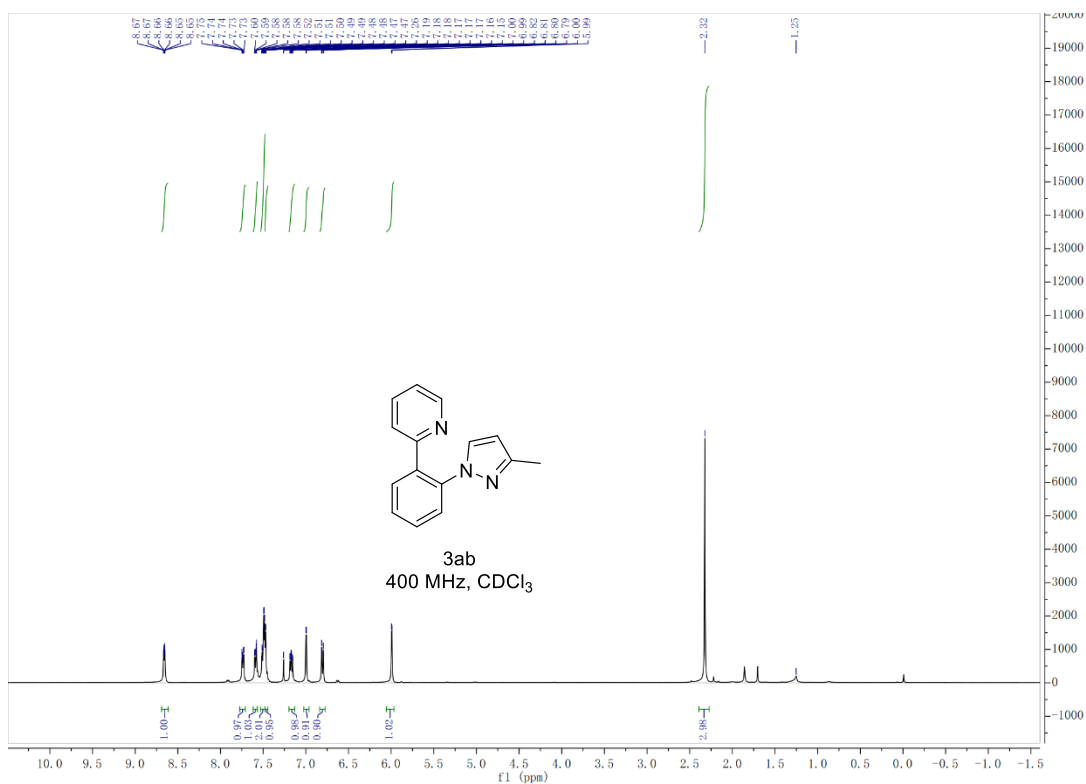

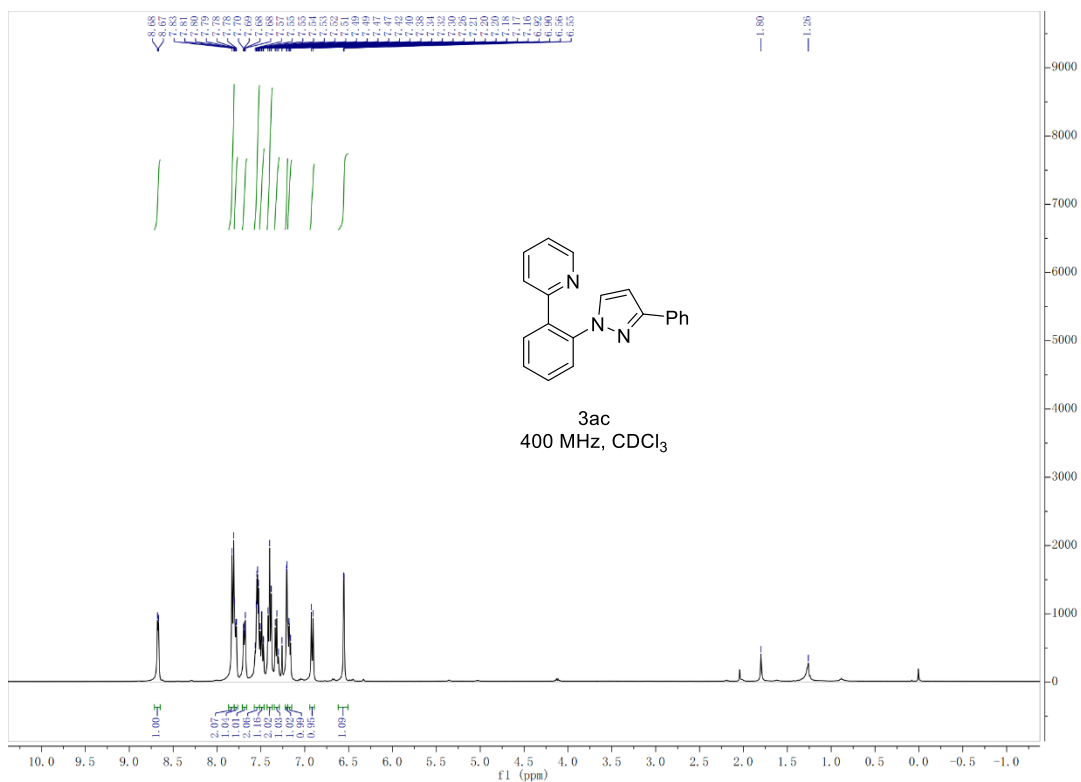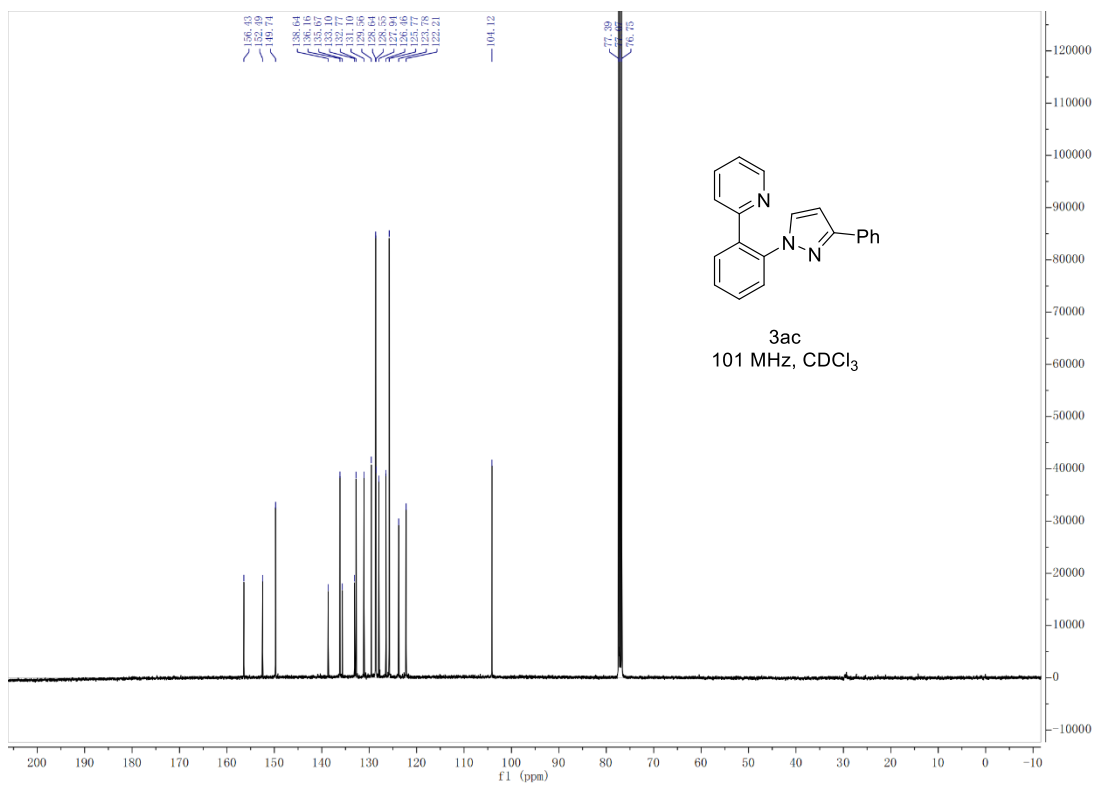

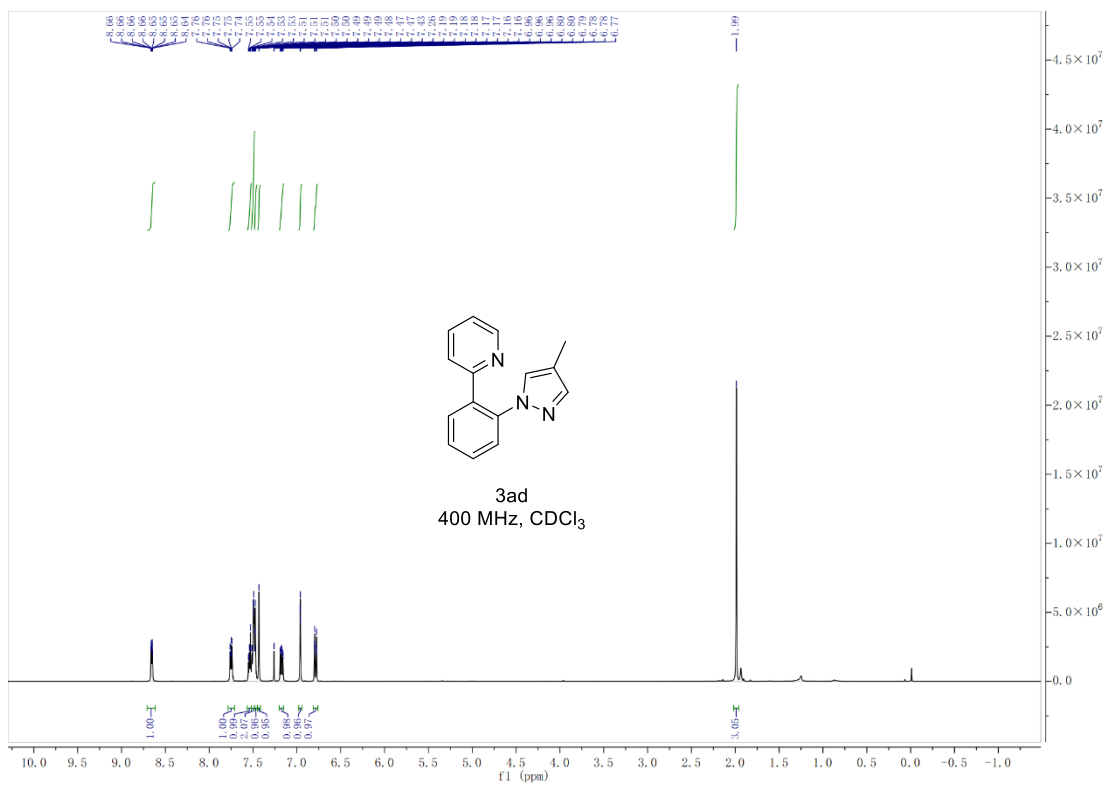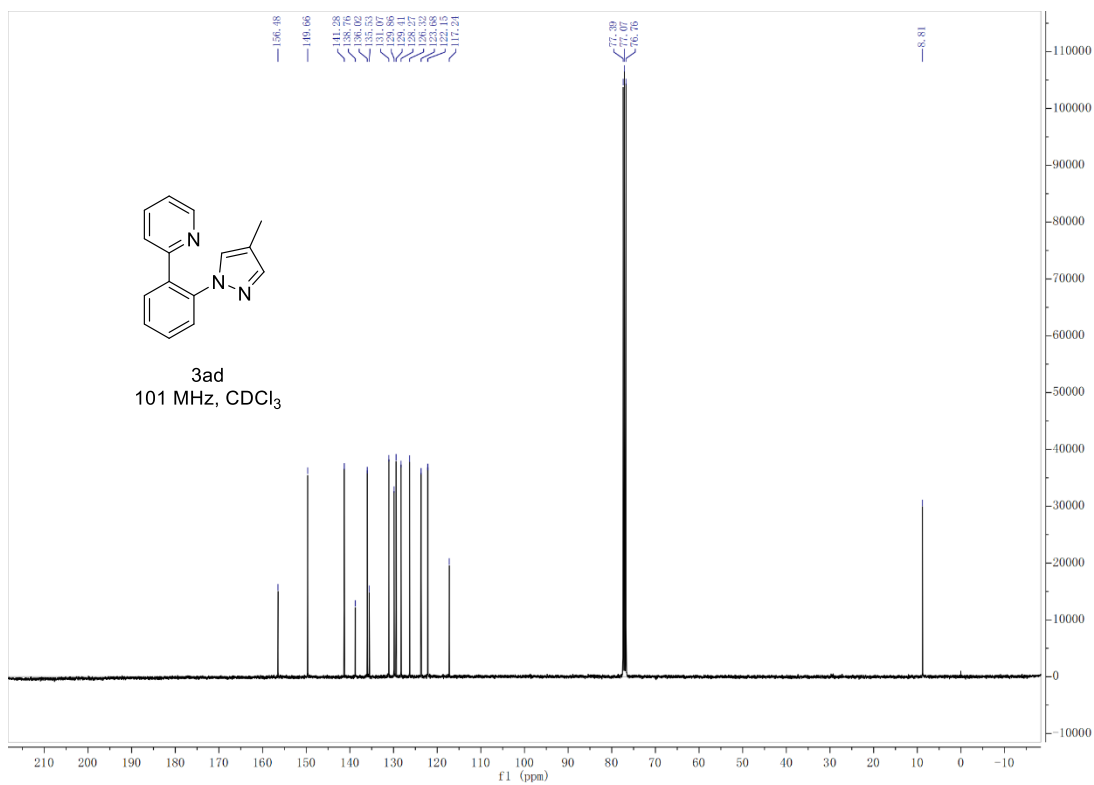



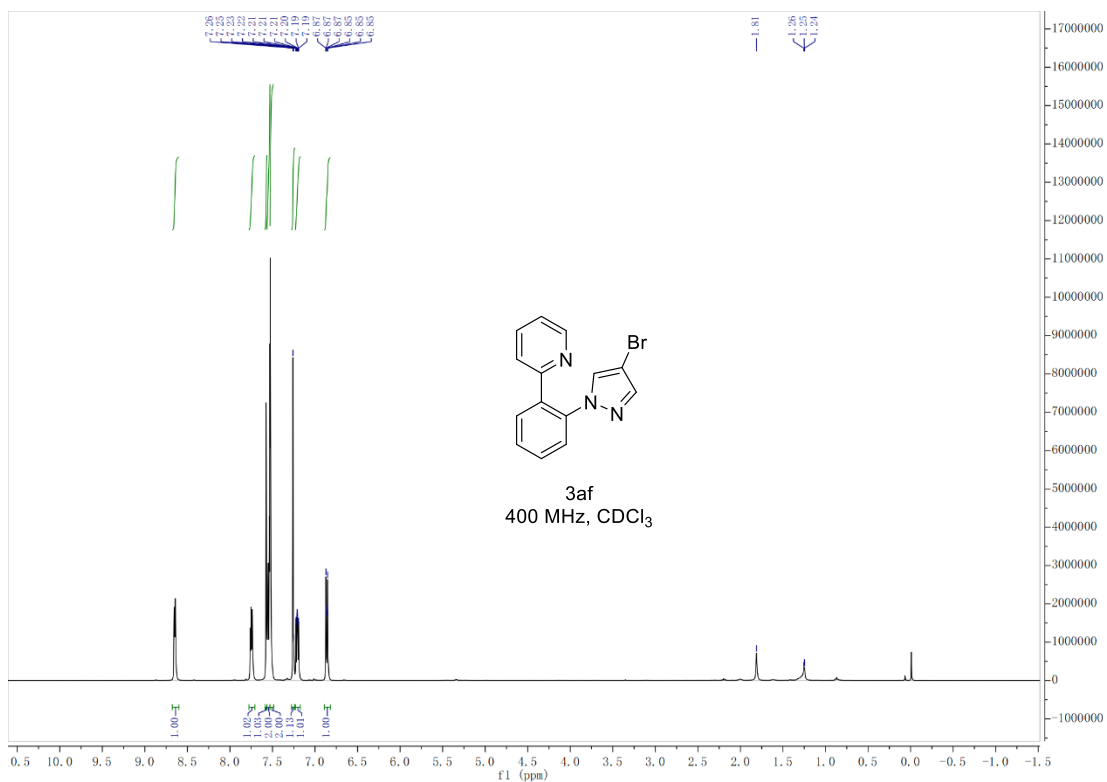



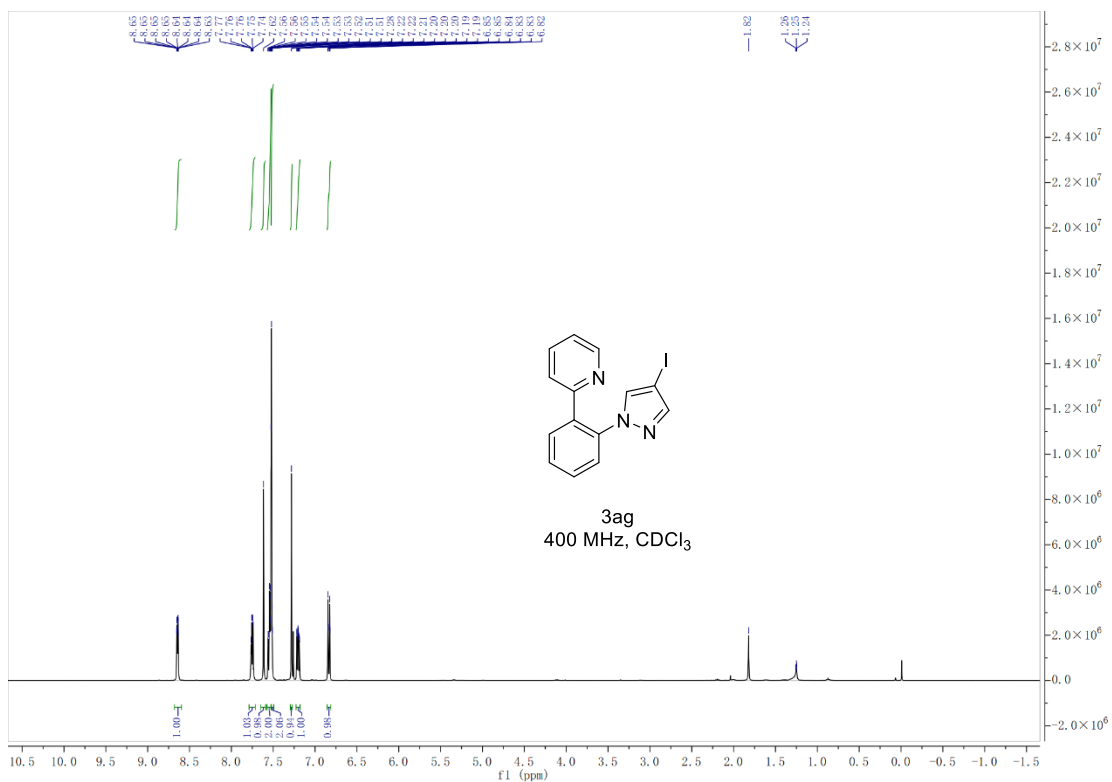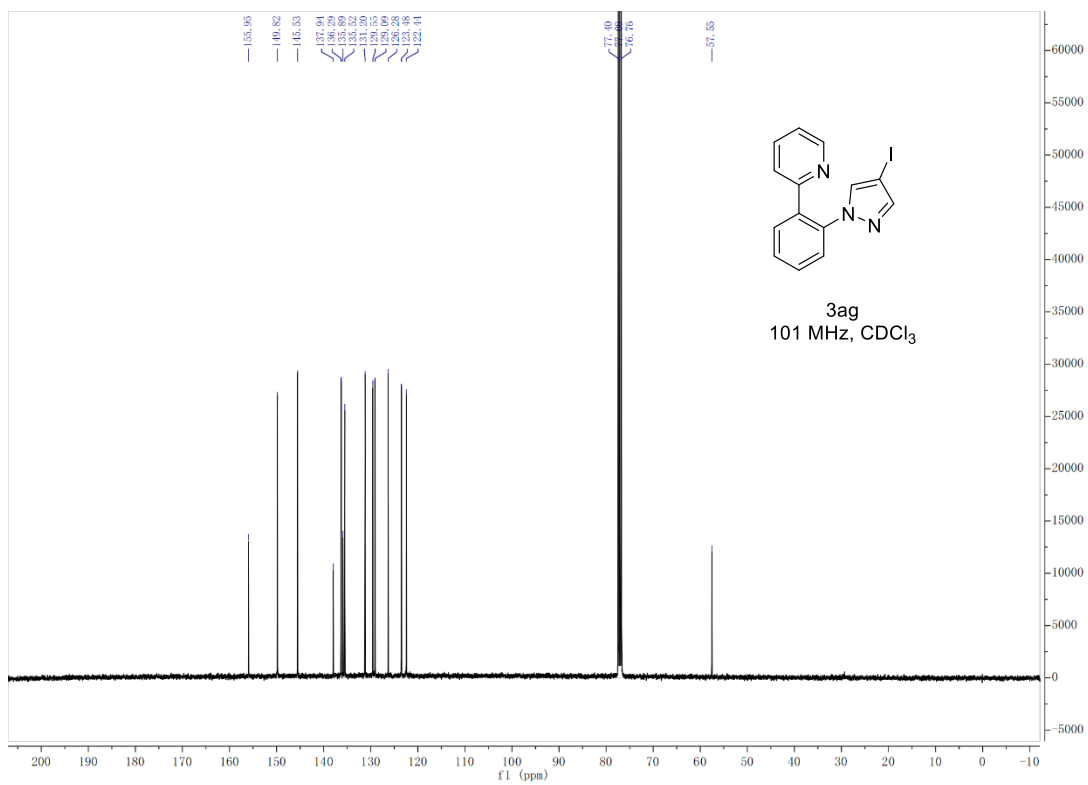







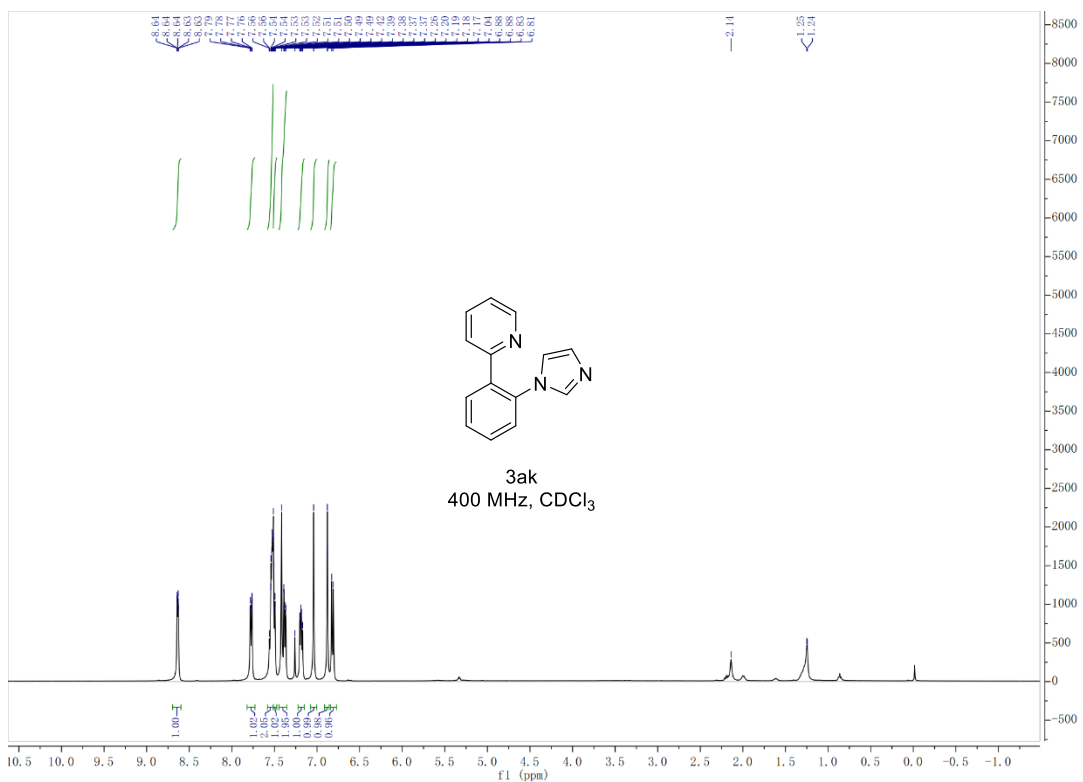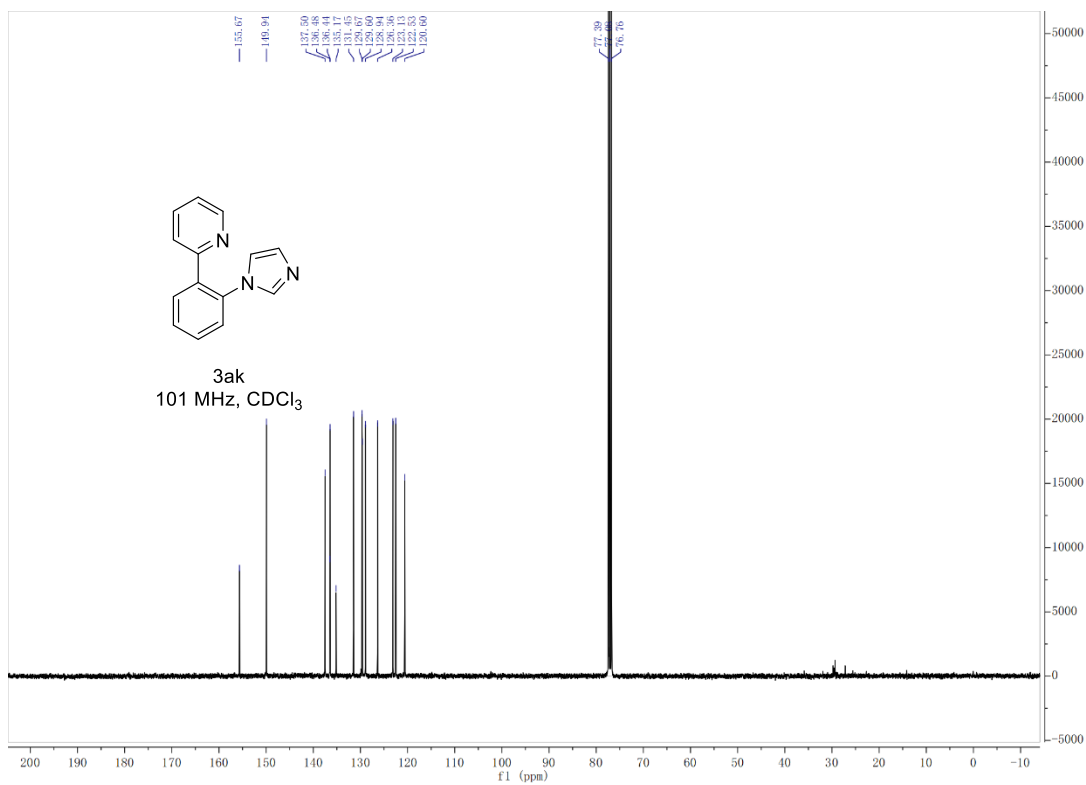



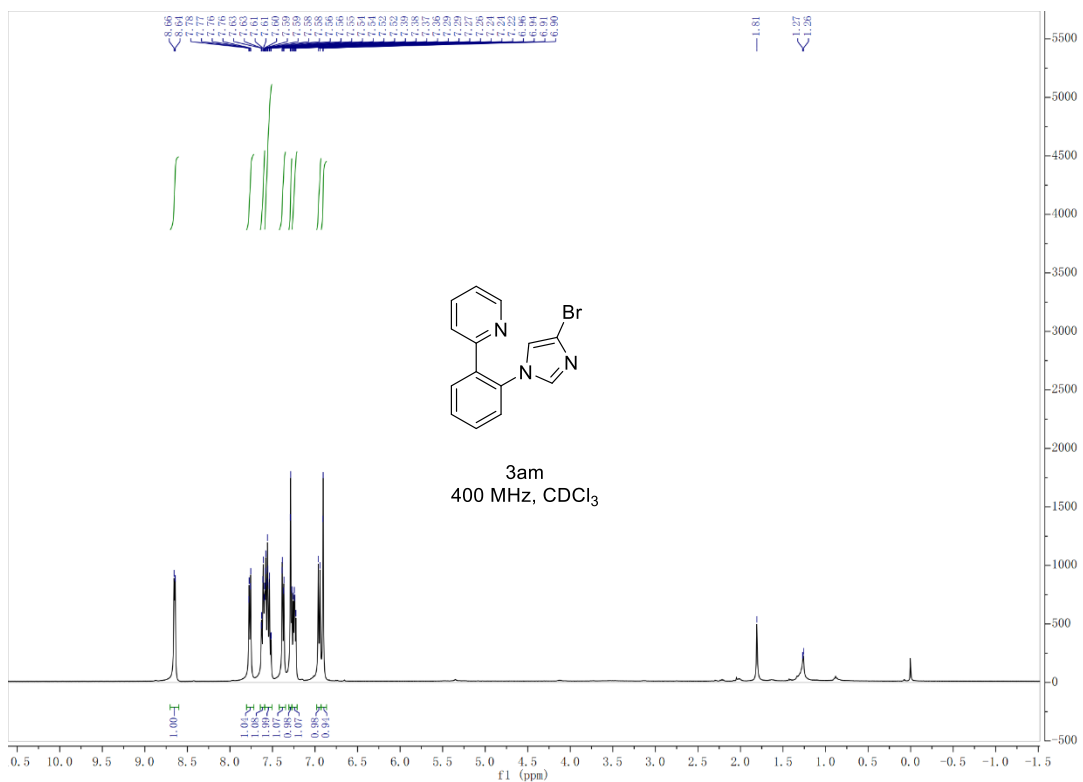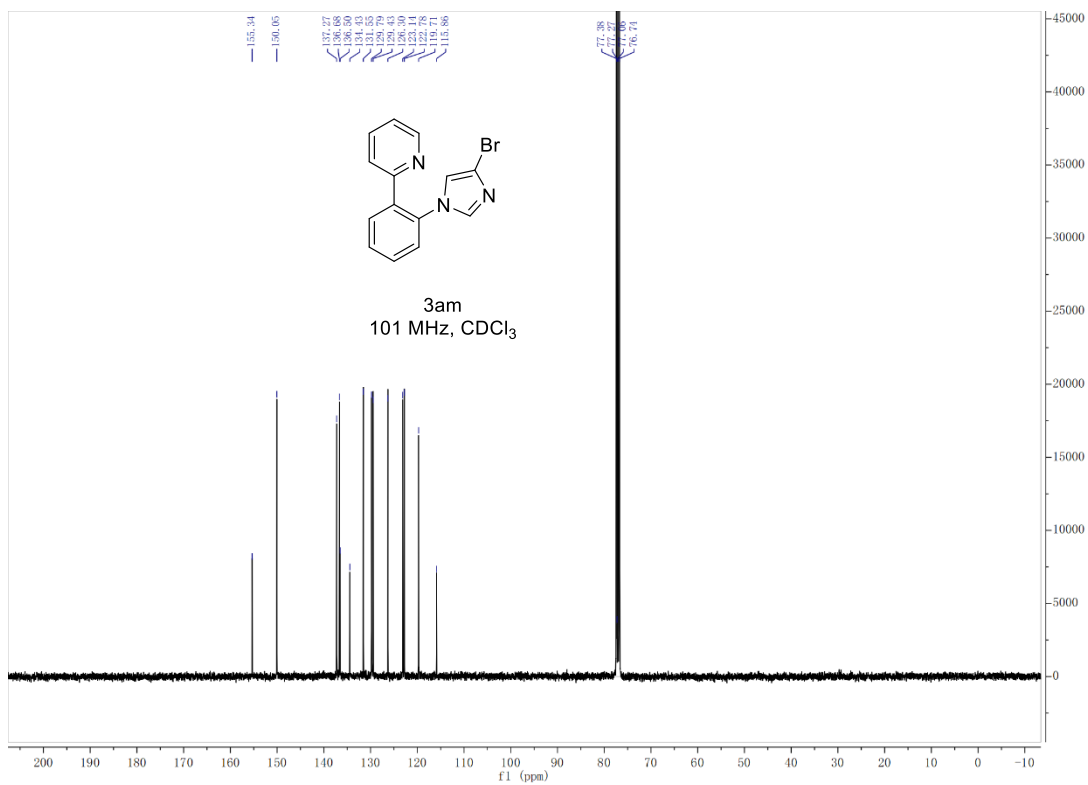







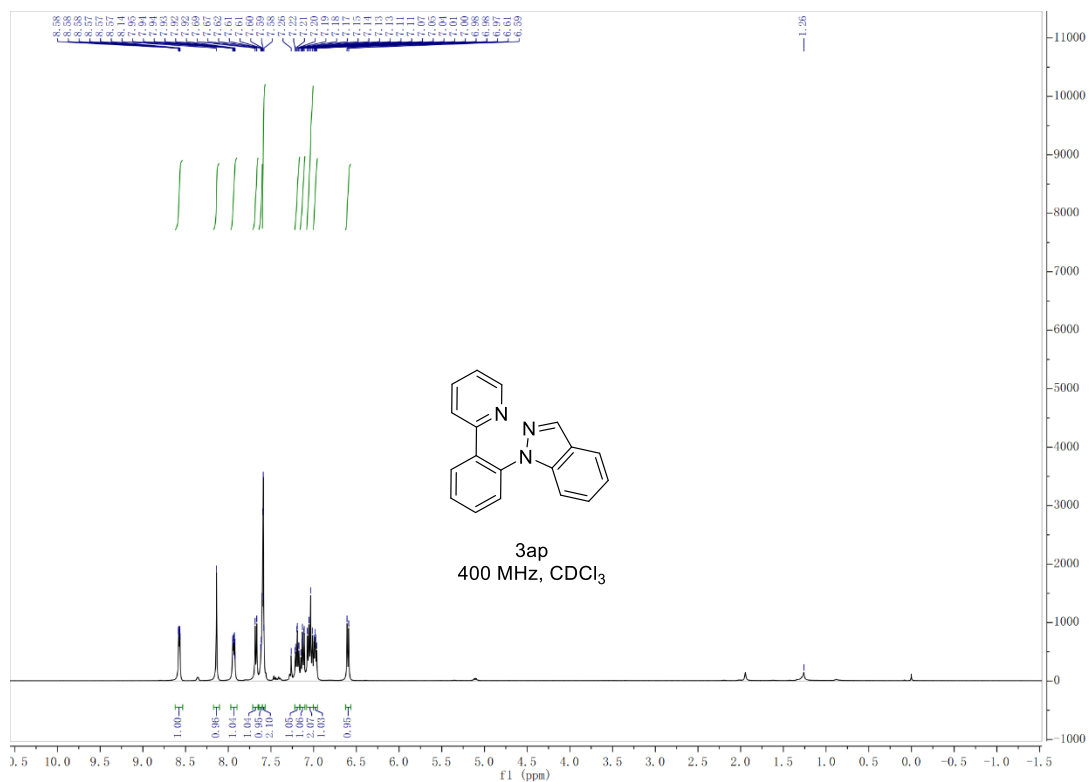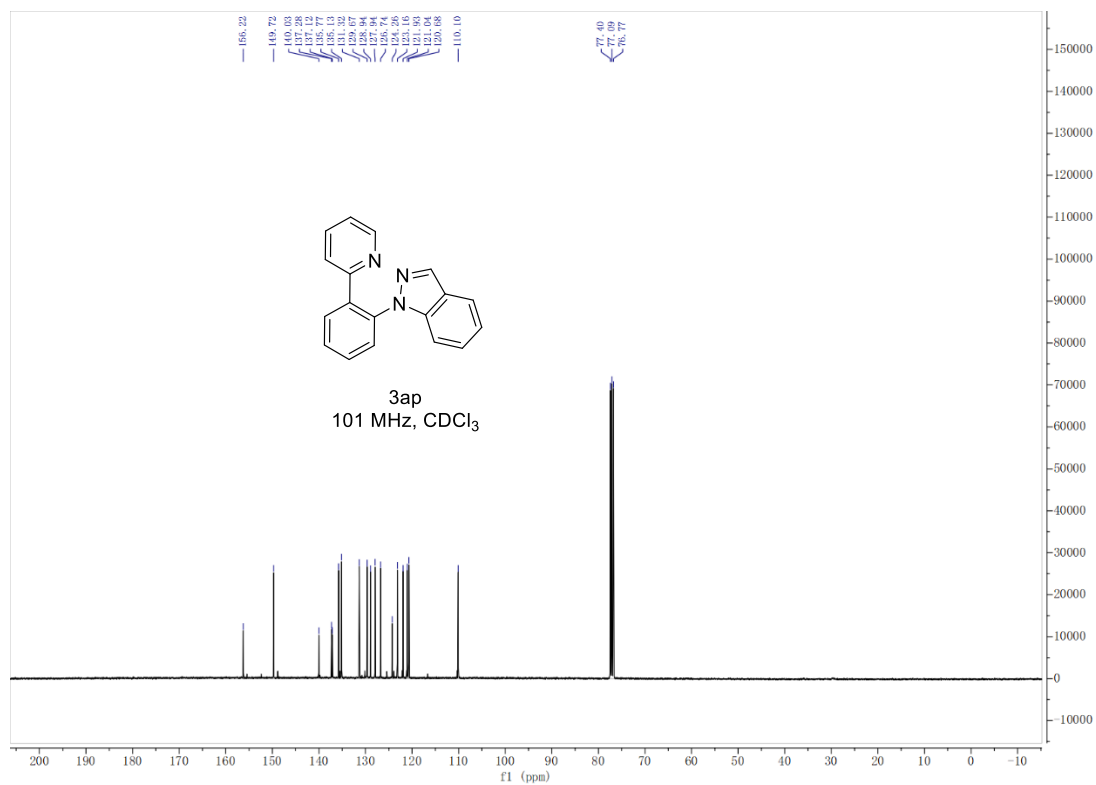



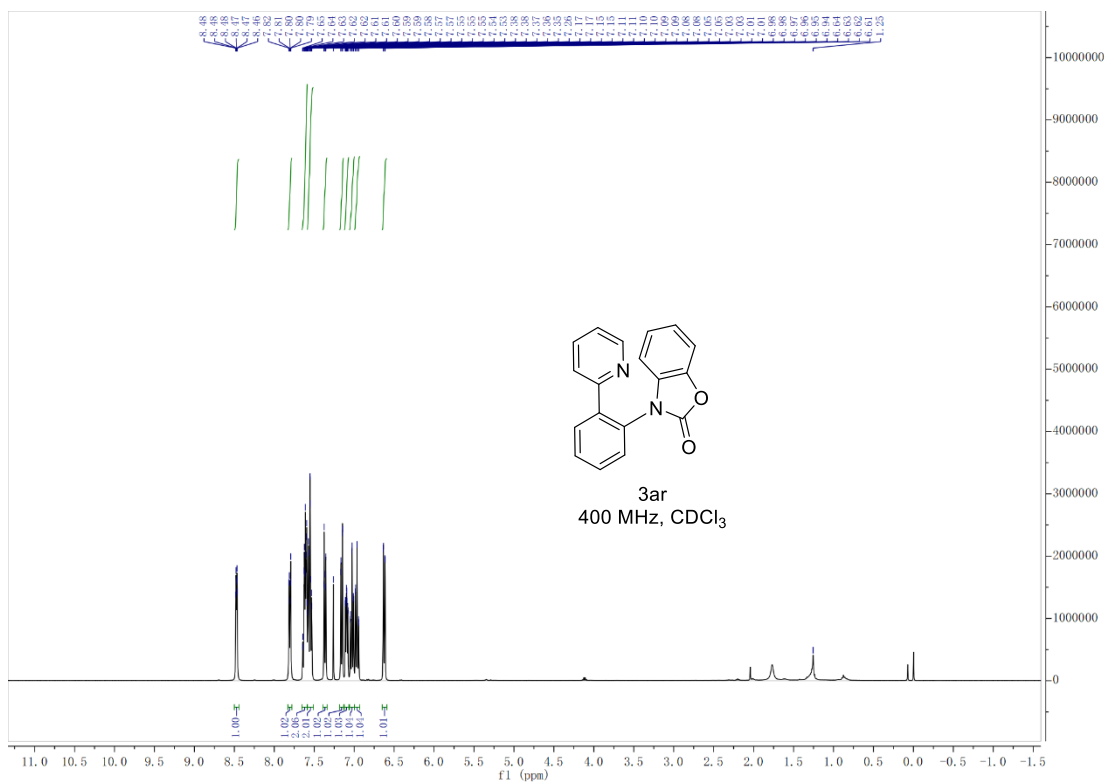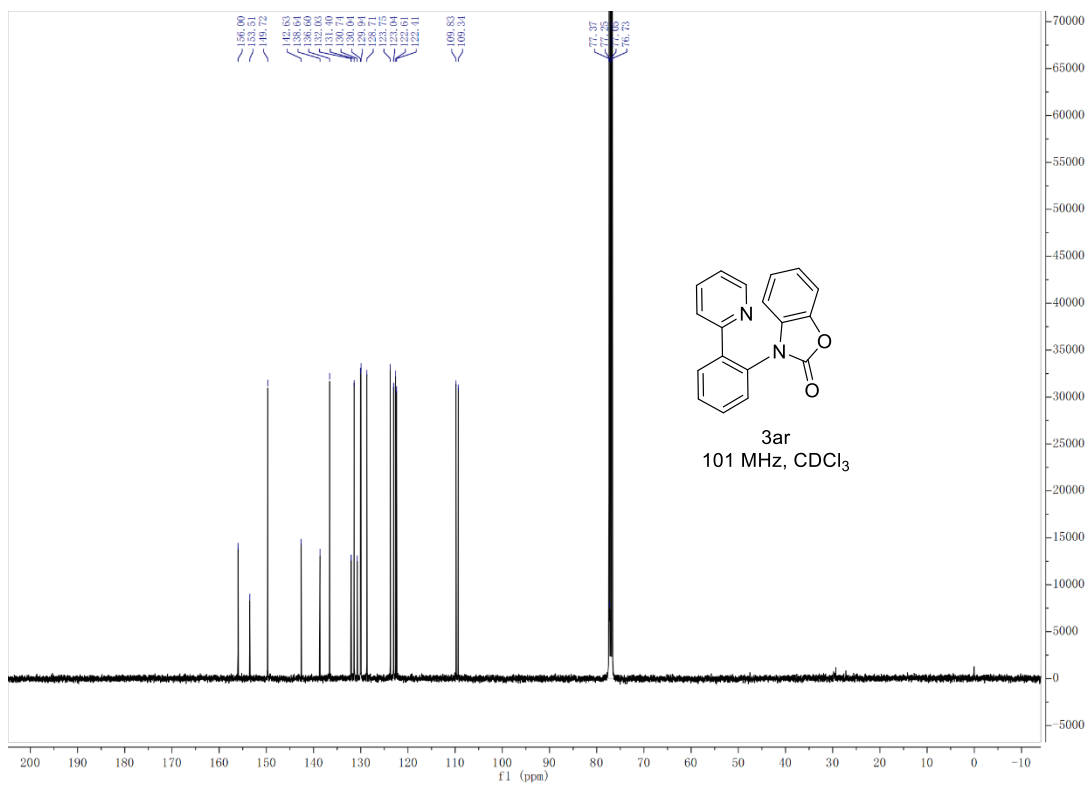

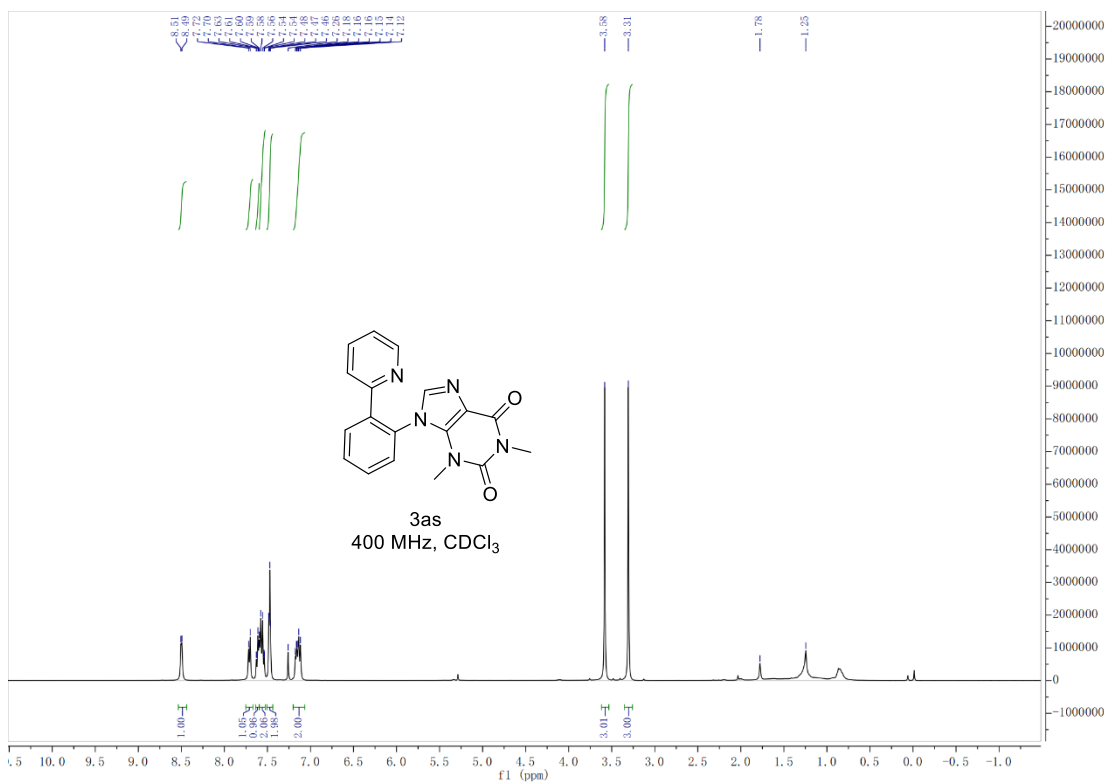

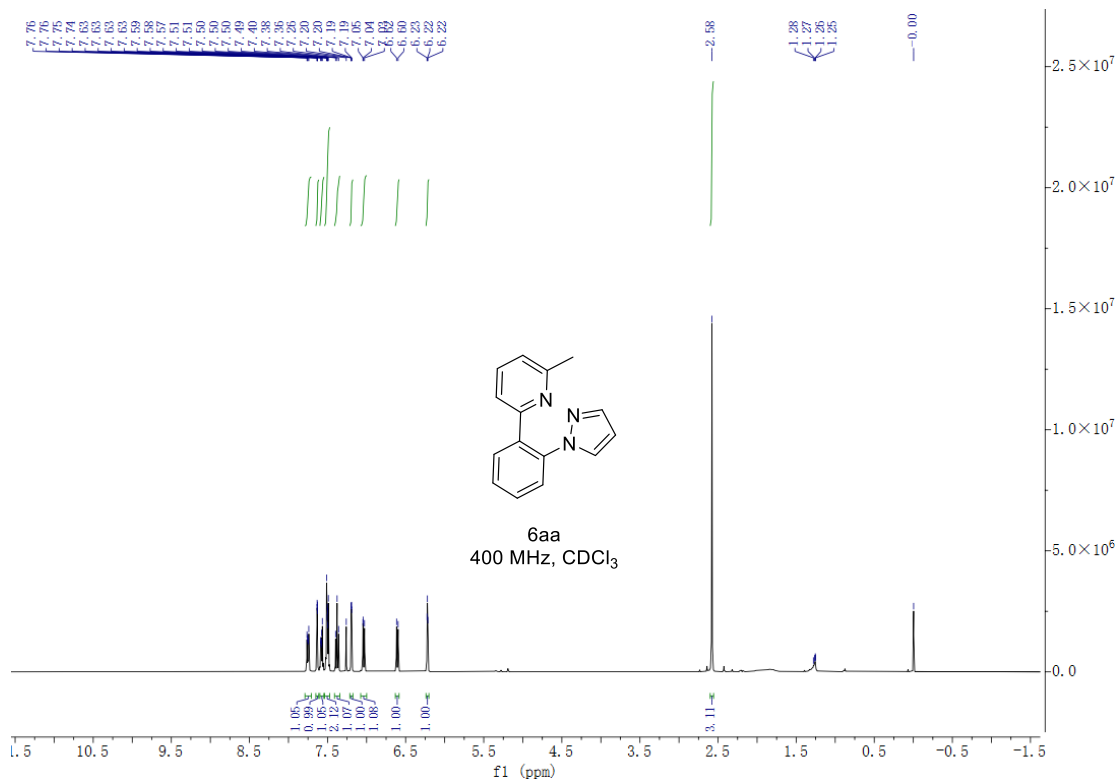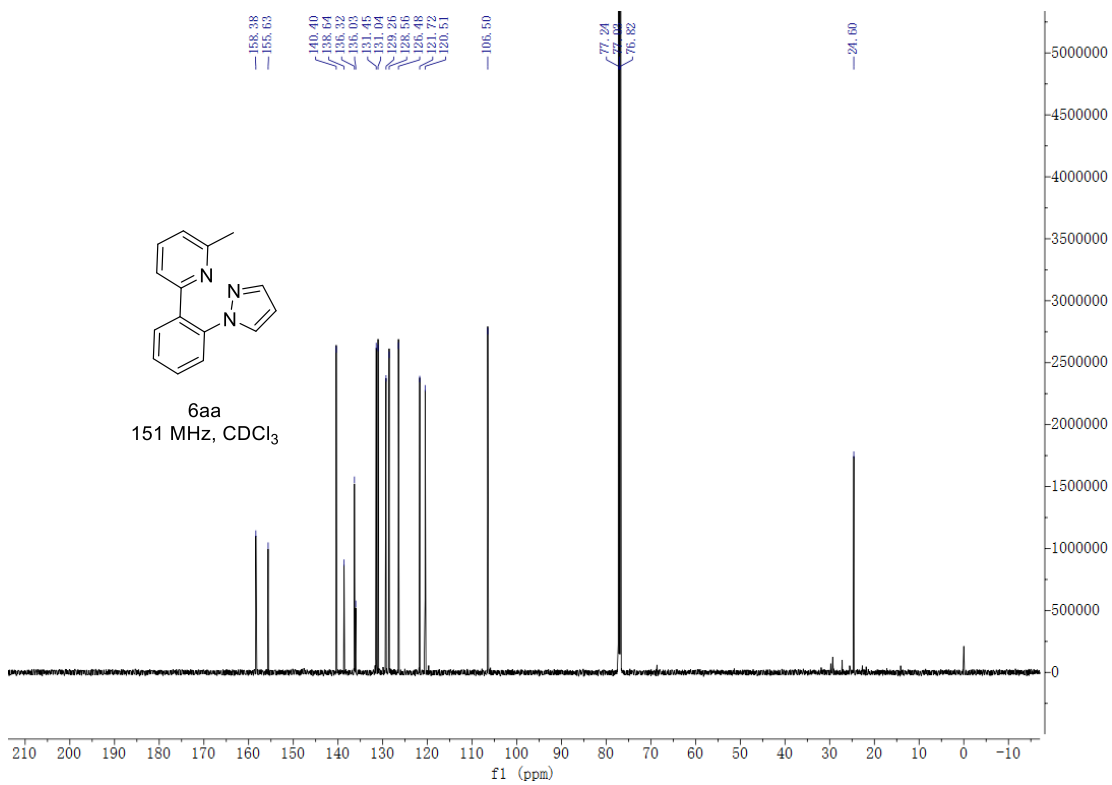

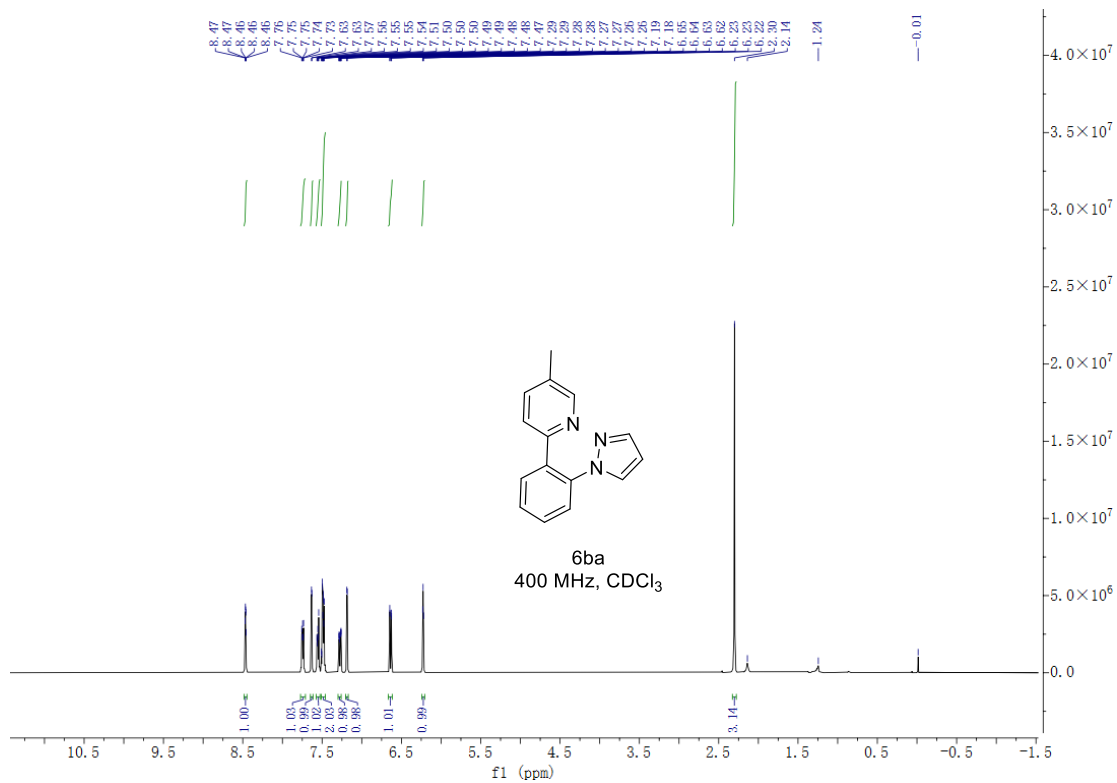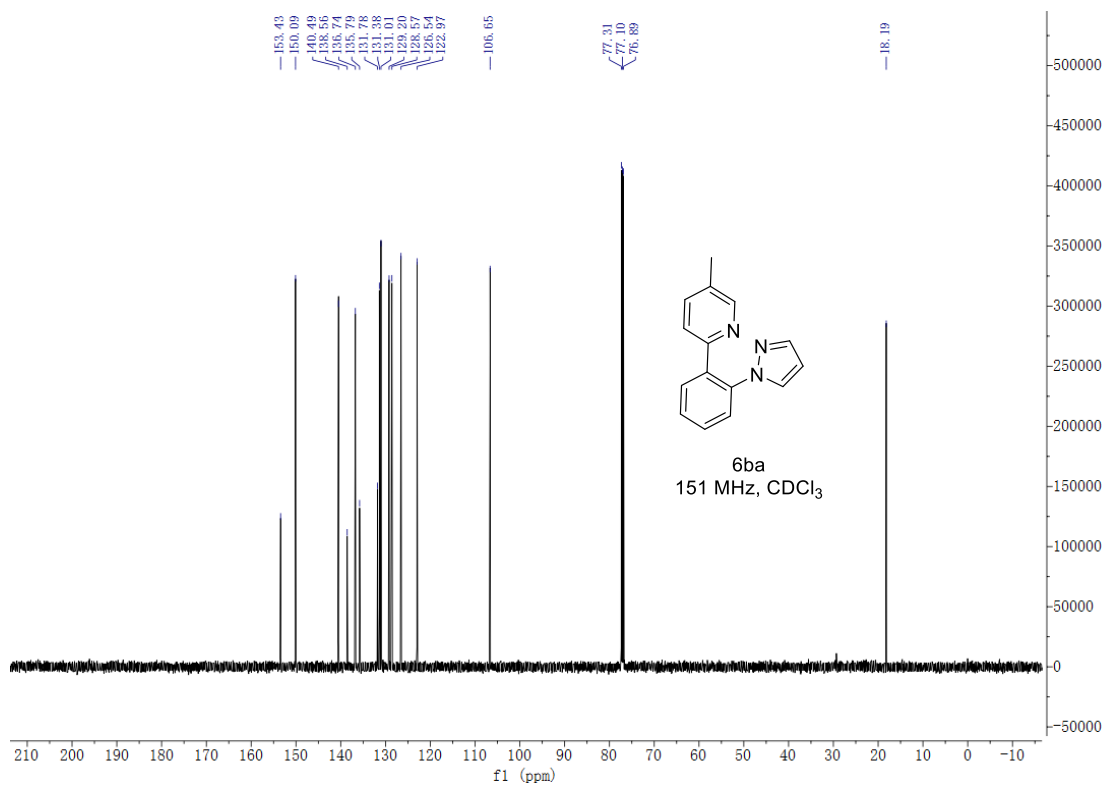





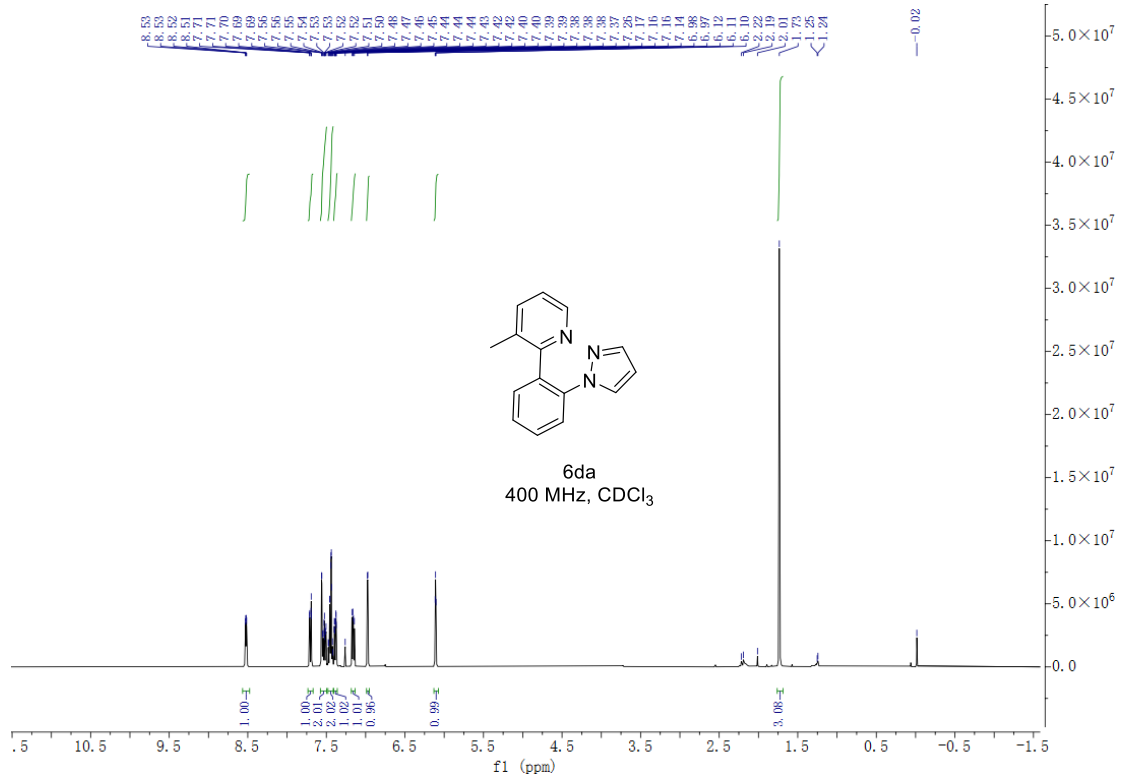

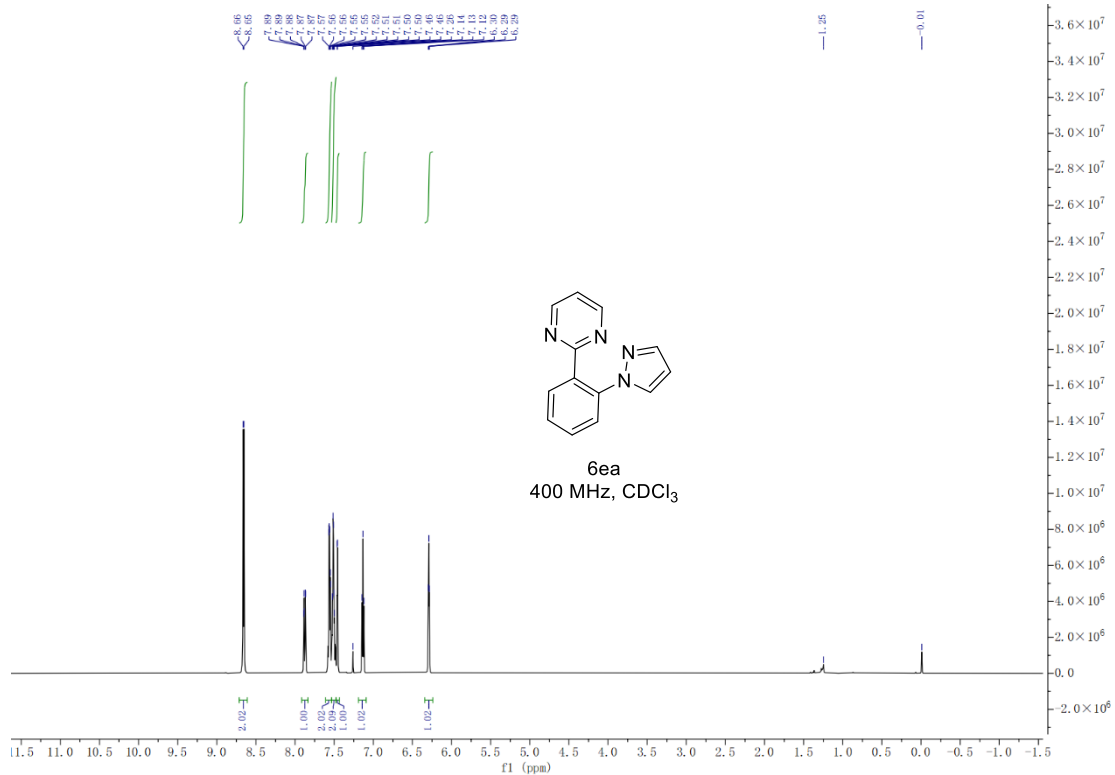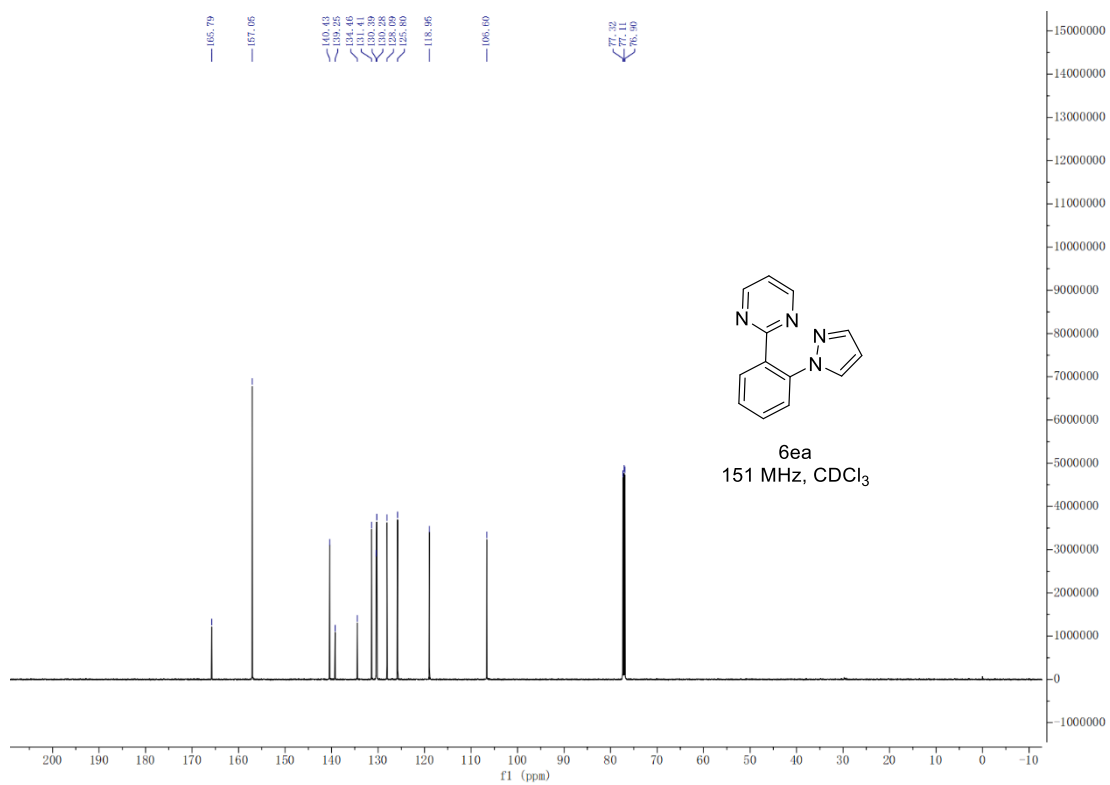





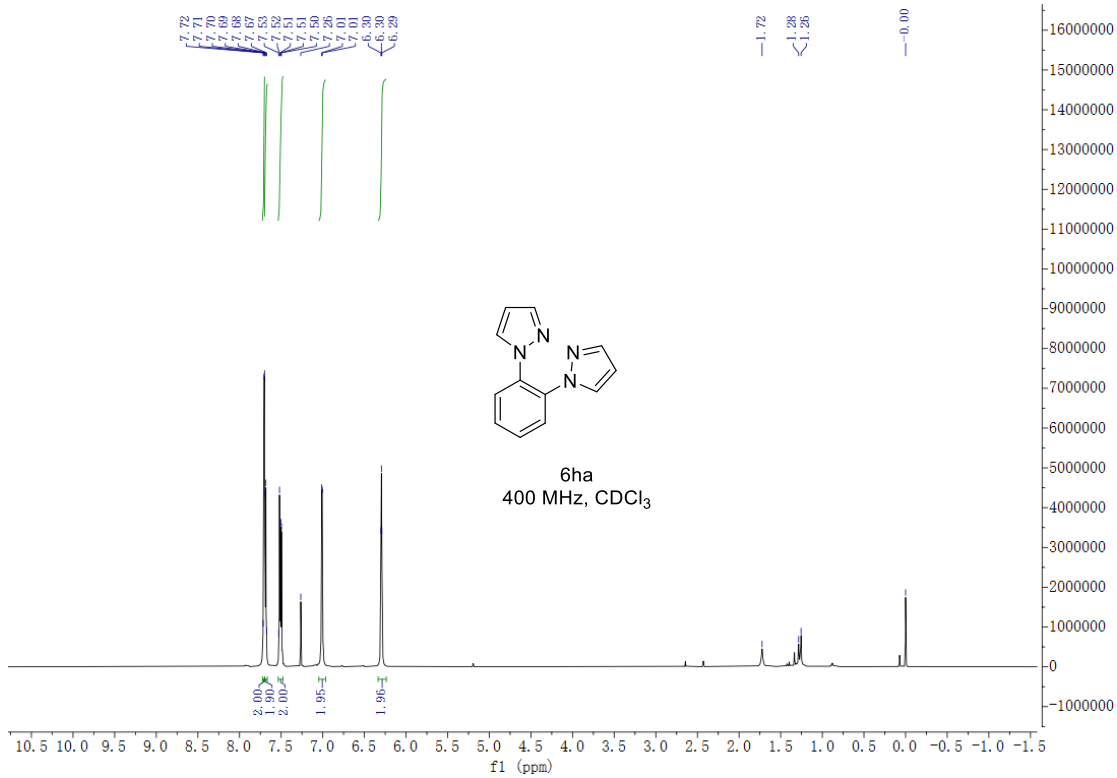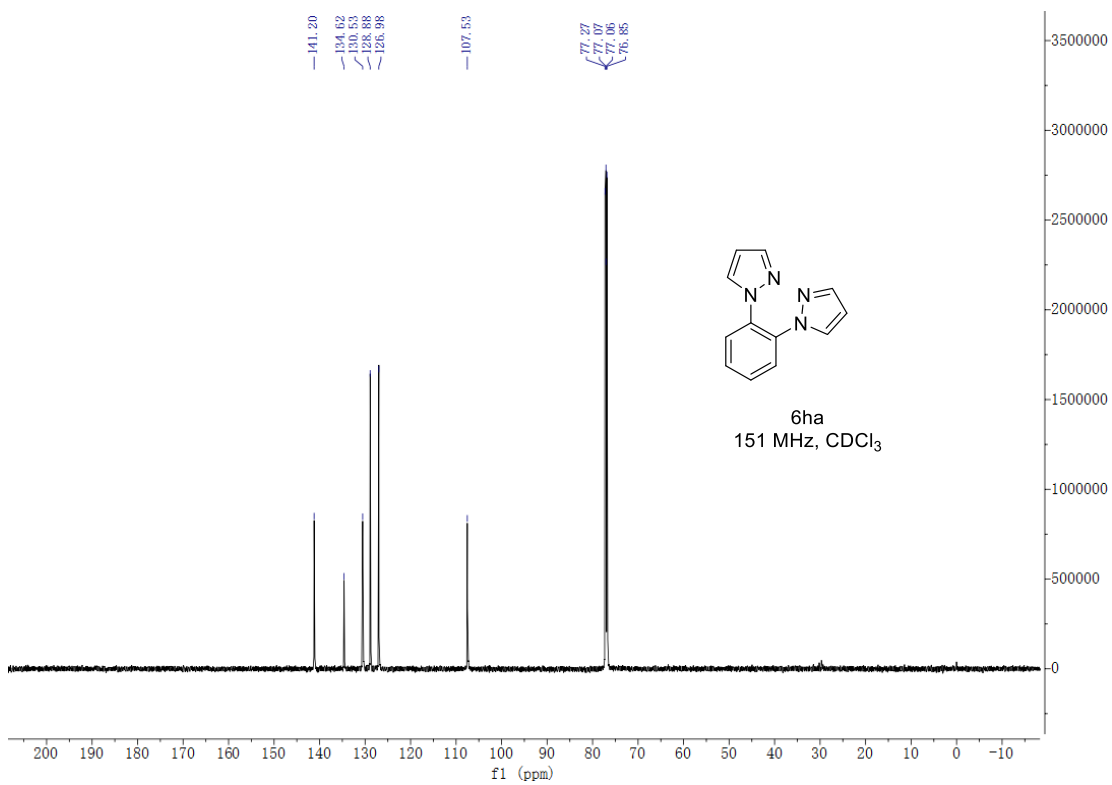









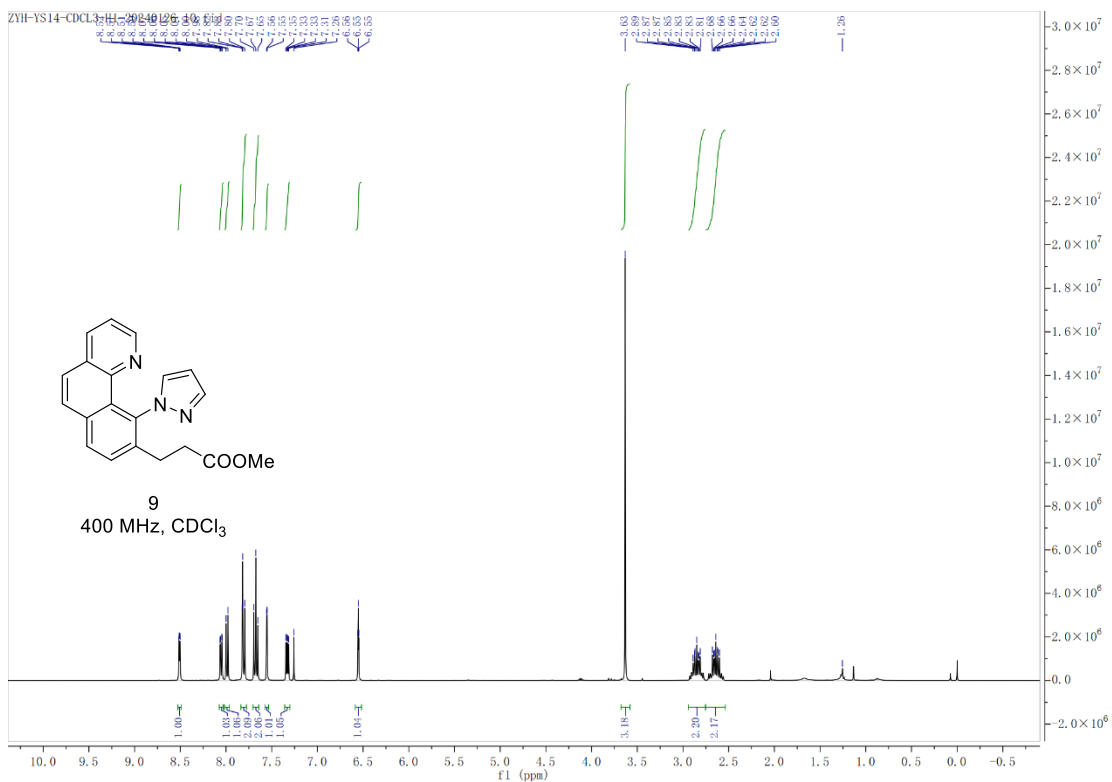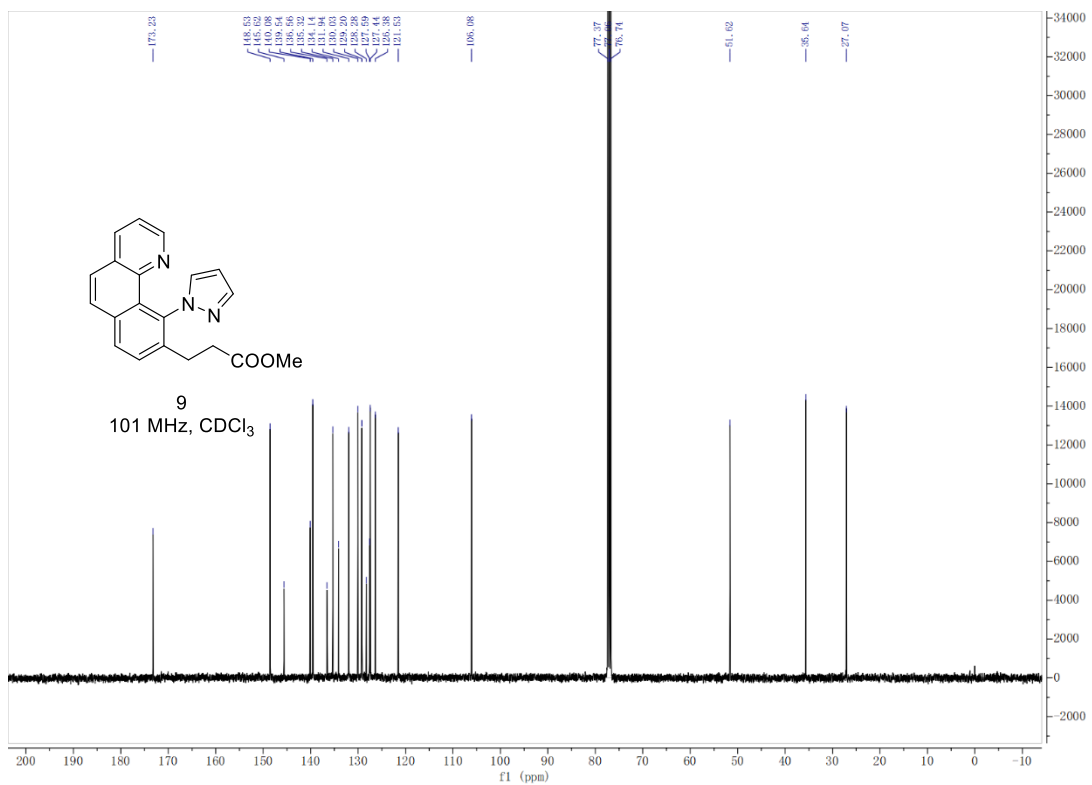

Supplement: d4ob01126k1.pdf [file d4ob01126k1.pdf]
